# Supplementary material for: Lewis acid modulation in phosphorus phenol nickel catalyzed ethylene polymerization and copolymerization
Source: Royal Society of Chemistry journal article supplement (doi:10.1039/d3py00925d), 2023-01-01
Supplement: d3py00925d1.pdf [file d3py00925d1.pdf]

## Supporting Information

### Lewis acids modulation in phosphorus phenol nickel catalyzed ethylene polymerization and copolymerization

Wenbing Wang,<sup>a</sup> Nan Nie,<sup>a</sup> Menghe Xu,<sup>a,\*</sup> Chen Zou<sup>a,\*</sup>

<sup>a</sup> CAS Key Laboratory of Soft Matter Chemistry, Hefei National Laboratory for Physical Sciences at the Microscale, Department of Polymer Science and Engineering, University of Science and Technology of China, Hefei, 230026, China

#### Content

|                                                                                     |           |
|-------------------------------------------------------------------------------------|-----------|
| <b>1. Supplementary Figures and Tables .....</b>                                    | <b>2</b>  |
| <b>2. Experimental Section.....</b>                                                 | <b>5</b>  |
| <b>2.1 General methods.....</b>                                                     | <b>5</b>  |
| <b>2.2 Procedure for polymerization.....</b>                                        | <b>6</b>  |
| <b>2.3 Ligand preparation procedures.....</b>                                       | <b>7</b>  |
| <b>3. <sup>1</sup>H NMR and <sup>13</sup>C NMR of the ligands and catalyst.....</b> | <b>10</b> |
| <b>4. <sup>1</sup>H NMR spectra of the polymer samples.....</b>                     | <b>20</b> |
| <b>5. DSC of polymers.....</b>                                                      | <b>28</b> |
| <b>6. GPC of polymers.....</b>                                                      | <b>41</b> |
| <b>7. X-ray Crystallography.....</b>                                                | <b>59</b> |

## 1. Supplementary Figures and Tables

**Supplementary Table S1** Ethylene homopolymerization.<sup>a</sup>

| Ent. | Cat. | Lewis Acid                  | Yield/g | Act. <sup>b</sup> | T <sub>m</sub> (°C) <sup>c</sup> | M <sub>n</sub> (10 <sup>3</sup> ) <sup>d</sup> | PDI <sup>d</sup> |
|------|------|-----------------------------|---------|-------------------|----------------------------------|------------------------------------------------|------------------|
| 1    | -    | Ni(OAc) <sub>2</sub>        | -       | -                 | -                                | -                                              | -                |
| 2    | -    | Zn(OAc) <sub>2</sub>        | -       | -                 | -                                | -                                              | -                |
| 3    | -    | Zn(TMEDA)(OAc) <sub>2</sub> | -       | -                 | -                                | -                                              | -                |

<sup>a</sup>Conditions: Lewis Acid 1 μmol, ethylene 8 atm, toluene 20 mL, t=15 min. <sup>b</sup> Activity is in unit of 10<sup>6</sup> g mol<sup>-1</sup> h<sup>-1</sup>. <sup>c</sup> Determined by differential scanning calorimetry (DSC; second heating). <sup>d</sup> Determined by GPC in trichlorobenzene at 160 °C with polystyrene standards. M<sub>n</sub> is in unit of kg mol<sup>-1</sup>.

**Supplementary Table S2** Ethylene homopolymerization.<sup>a</sup>

| Ent. | Cat. | Lewis Acid           | Yield/g | Act. <sup>b</sup> | T <sub>m</sub> (°C) <sup>c</sup> | M <sub>n</sub> (10 <sup>3</sup> ) <sup>d</sup> | PDI <sup>d</sup> |
|------|------|----------------------|---------|-------------------|----------------------------------|------------------------------------------------|------------------|
| 1    | Ni1  | Ni(COD) <sub>2</sub> | 1.2     | 4.8               | 119.1                            | 6.8                                            | 2.4              |
| 2    | Ni2  | Ni(COD) <sub>2</sub> | 1.8     | 7.2               | 129.1                            | 12.4                                           | 3.7              |
| 3    | Ni3  | Ni(COD) <sub>2</sub> | 3.3     | 13.2              | 130.5                            | 28.6                                           | 5.3              |

<sup>a</sup>Conditions: Ni catalyst 1 μmol, ethylene 8 atm, toluene 20 mL, Ni(COD)<sub>2</sub> 1 eq, t=15 min. <sup>b</sup> Activity is in unit of 10<sup>6</sup> g mol<sup>-1</sup> h<sup>-1</sup>. <sup>c</sup> Determined by differential scanning calorimetry (DSC; second heating). <sup>d</sup> Determined by GPC in trichlorobenzene at 160 °C with polystyrene standards. M<sub>n</sub> is in unit of kg mol<sup>-1</sup>.

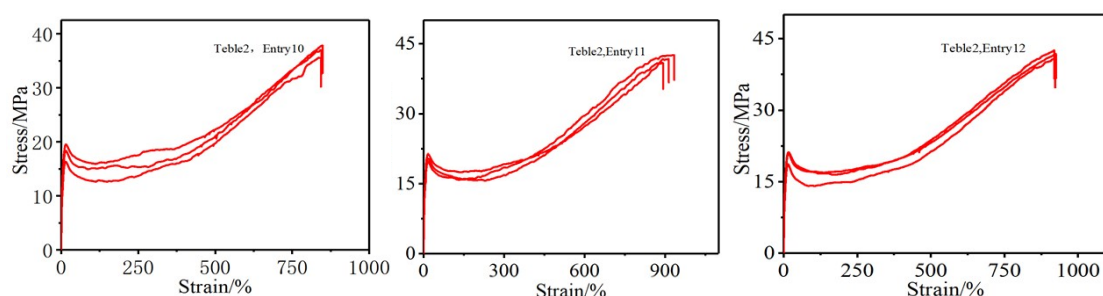

**Figure S1** Stress-strain curves for every copolymer tested three times in Figure 4a.

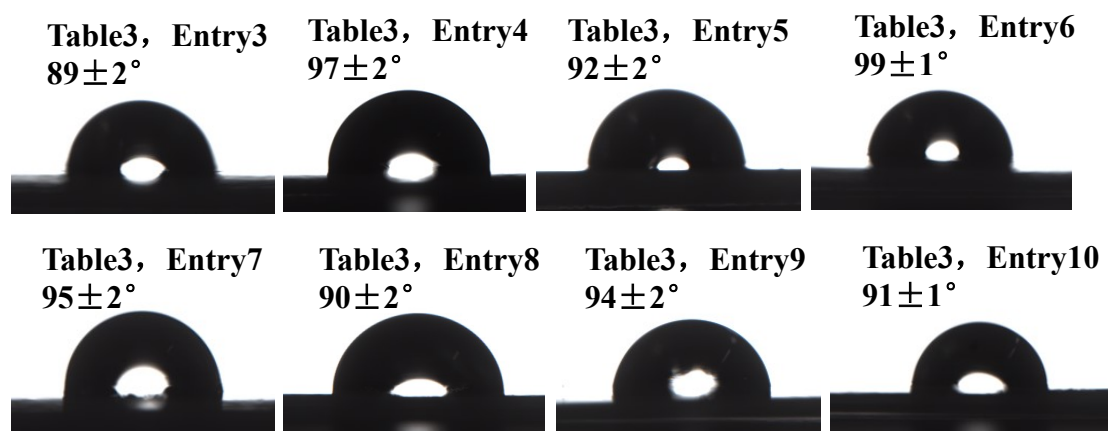

**Figure S2** The values and figures of copolymers' WCAs in Figure 4b.

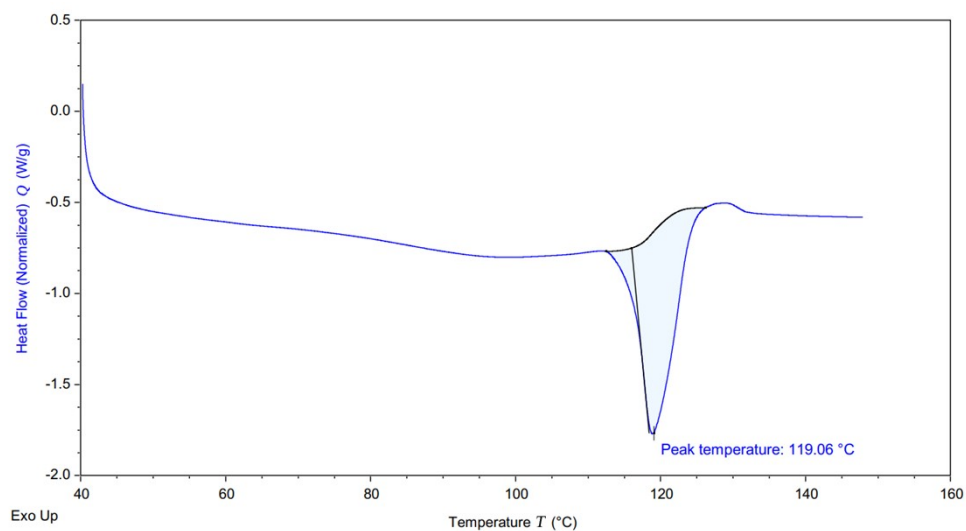

**Figure S3** DSC of the polymer from Table S2, Entry 1.

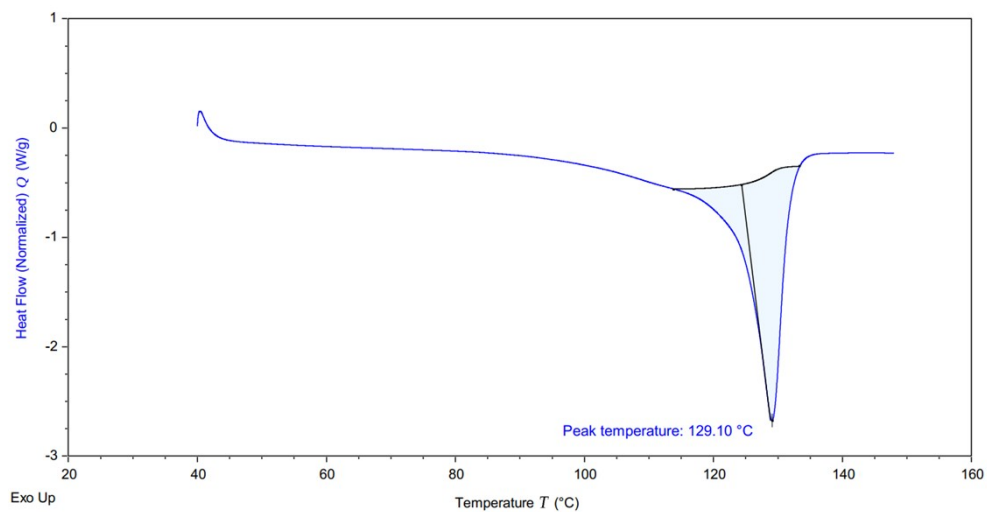

**Figure S4** DSC of the polymer from Table S2, Entry 2.

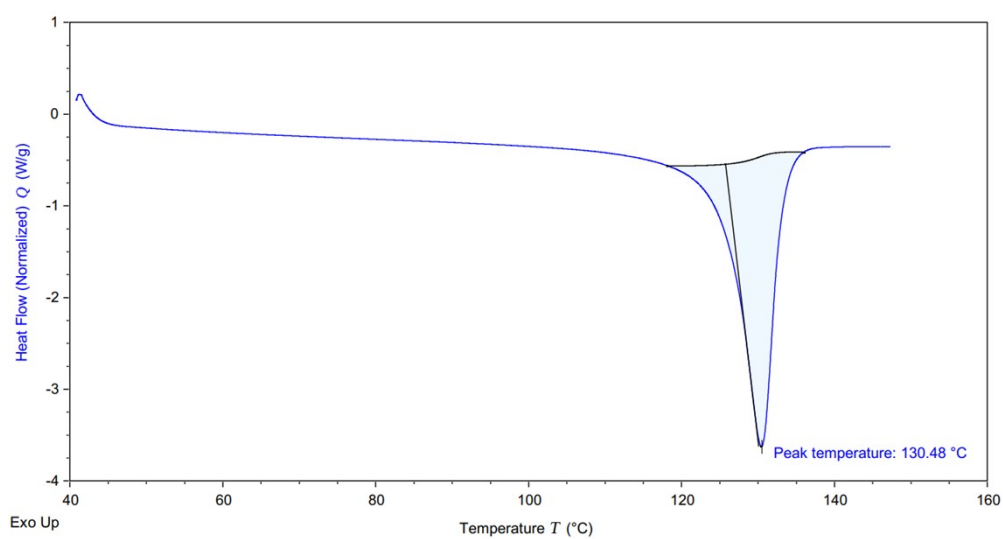

**Figure S5** DSC of the polymer from Table S2, Entry 3.

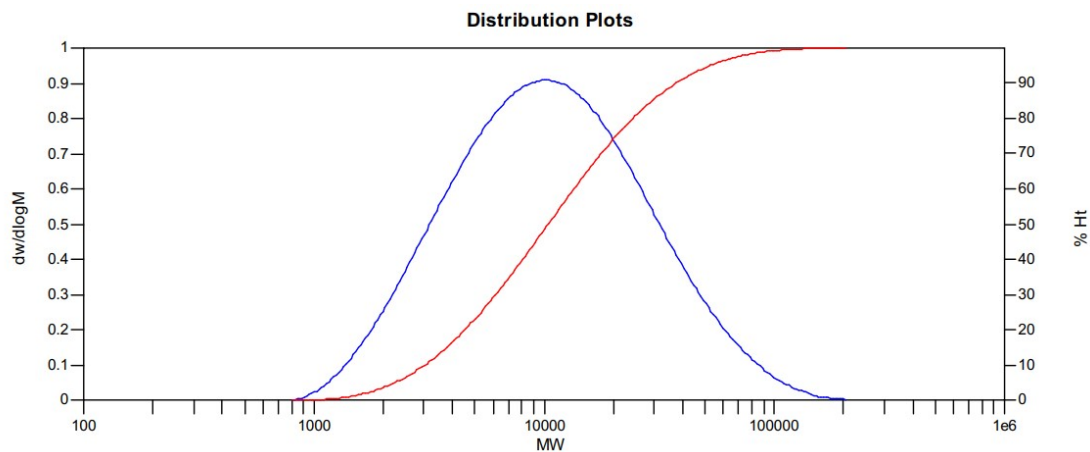

**MW Averages**

| Peak No | Mp    | Mn   | Mw    | Mz    | Mz+1  | Mv    | PD      |
|---------|-------|------|-------|-------|-------|-------|---------|
| 1       | 10027 | 6832 | 16388 | 36397 | 63228 | 14289 | 2.39871 |

**Processed Peaks**

| Peak No | Name | Start RT (mins) | Max RT (mins) | End RT (mins) | Pk Height (mV) | % Height | Area (mV.secs) | % Area |
|---------|------|-----------------|---------------|---------------|----------------|----------|----------------|--------|
| 1       |      | 13.13           | 15.23         | 16.90         | -17.9506       | 0        | 1861.13        | 100    |

**Figure S6** GPC of the polymer from Table S2, Entry 1.

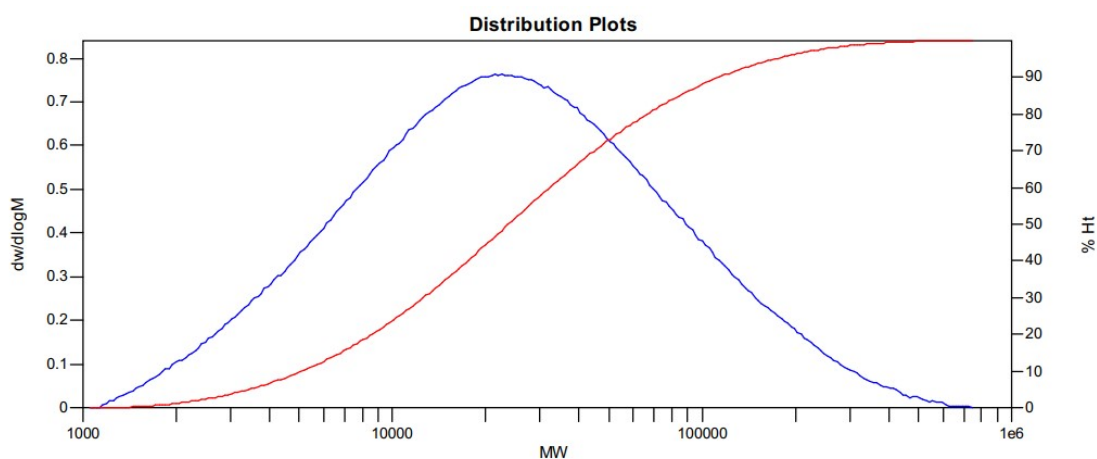

**MW Averages**

| Peak No | Mp    | Mn    | Mw    | Mz     | Mz+1   | Mv    | PD      |
|---------|-------|-------|-------|--------|--------|-------|---------|
| 1       | 22496 | 12449 | 45903 | 134279 | 249239 | 37693 | 3.68728 |

**Processed Peaks**

| Peak No | Name | Start RT (mins) | Max RT (mins) | End RT (mins) | Pk Height (mV) | % Height | Area (mV.secs) | % Area |
|---------|------|-----------------|---------------|---------------|----------------|----------|----------------|--------|
| 1       |      | 12.25           | 14.67         | 16.72         | -6.88011       | 0        | 848.833        | 100    |

**Figure S7** GPC of the polymer from Table S1, Entry 2.

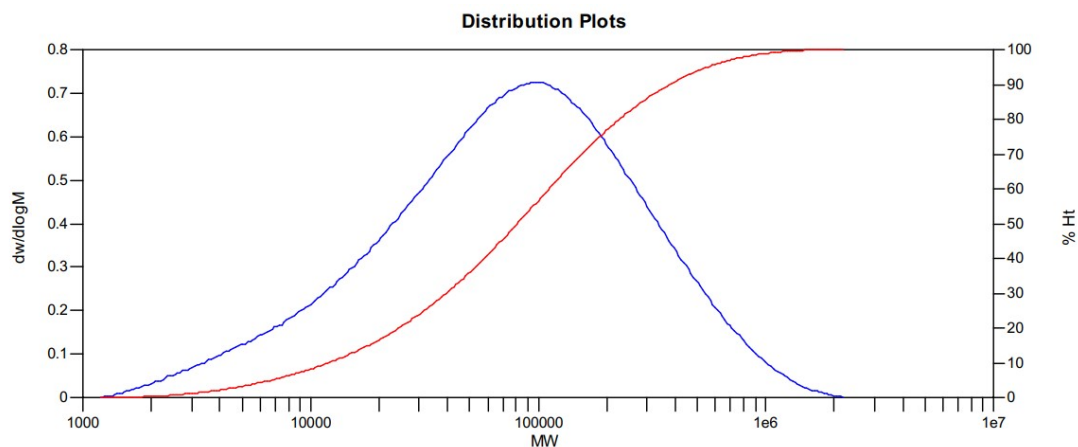

#### MW Averages

| Peak No | Mp     | Mn    | Mw     | Mz     | Mz+1   | Mv     | PD      |
|---------|--------|-------|--------|--------|--------|--------|---------|
| 1       | 100181 | 28619 | 150784 | 421403 | 745770 | 123397 | 5.26867 |

#### Processed Peaks

| Peak No | Name | Start RT (mins) | Max RT (mins) | End RT (mins) | Pk Height (mV) | % Height | Area (mV.secs) | % Area |
|---------|------|-----------------|---------------|---------------|----------------|----------|----------------|--------|
| 1       |      | 11.52           | 13.67         | 16.63         | -8.66449       | 0        | 1124.82        | 100    |

**Figure S8** GPC of the polymer from Table S1, Entry 3.

## 2. Experimental

### 2.1 General consideration

All manipulations of air- and water-sensitive compounds were carried out using standard Schlenk, high-vacuum, and glovebox techniques. Deuterated solvents used for NMR were dried and distilled prior to use.  $^1\text{H}$  NMR spectra was recorded by a Bruker Ascend Tm 400 spectrometer at ambient temperature unless otherwise stated. The chemical shifts of the  $^1\text{H}$  NMR spectra were referenced to the residual solvent; Coupling constants are in Hz. Molecular weight and molecular weight distribution of the polymer were determined by gel permeation chromatography (GPC) with a PL-220 equipped with two Agilent PLgel Olexis columns at 160 °C using trichlorobenzene as a solvent, and the calibration was made using polystyrene standard and are corrected for linear polyethylene by universal calibration using the Mark-Houwink parameters of Rudin:  $K = 1.75 \times 10^{-2} \text{ cm}^3/\text{g}$  and  $R = 0.67$  for polystyrene and  $K = 5.90 \times 10^{-2} \text{ cm}^3/\text{g}$  and  $R = 0.69$  for polyethylene. DSC measurements were performed on a TA Instruments DSC250. Samples (ca. 5 mg) were annealed by heating to 150 °C at 10 °C /min, cooled to 40 °C at 10 °C /min, and

then analyzed while being heated to 150 °C at 10 °C /min.

The water contact angles on polymer films were measured with a Contact Angle Meter SL200B (Solon Tech. Co., Ltd.) using the dynamic sessile drop method. Samples for water contact angle measurements were prepared via evaporation of 3 to 5 % (w/w) solutions in toluene onto glass slides under ambient conditions. The solvent was evaporated on top of a glass slide for 10 minutes, and a second layer of the polymer solution was then applied to increase thickness. The water contact angles of the polymer thin films were measured using a contact angle goniometer at 25 °C with an accuracy of  $\pm 3^\circ$ . The reported values are the average of at least six measurements made at different positions of the film.

A standard test method, ASTM 638, was followed to measure the tensile properties of the polyethylene samples. Polymers were melt-pressed at 30 to 35°C above their melting point to obtain the dog-bone-shaped tensile-test specimens. The test specimens showed 25-mm gauge length, 2-mm width, and thickness of 0.4 mm. Stress/strain experiments were performed at 10 m/min using a Universal Test Machine (UTM2502) at room temperature. At least three specimens of each copolymer were tested.

## **2.2 Ethylene polymerization procedure.**

For the polymerization reaction of ethylene at 8 atm pressures, a 350 mL glass thick-walled pressure vessel was charged with toluene, a desired amount of comonomer, and a magnetic stir bar in the glovebox. The pressure vessel was connected to a high-pressure line, and the solution was degassed. The vessel was warmed to the desired temperature using an oil bath and allowed to equilibrate for 5 min. The metal catalyst Ni<sub>1</sub>-Ni<sub>3</sub> in toluene was injected into the polymerization system via syringe. With rapid stirring, the reactor was pressurized, maintained at a desired ethylene pressure, and stirred continuously for a desired period. The pressure vessel was vented, the polymerization was quenched via the addition of MeOH (5 mL), and the polymer was precipitated using excess MeOH. After filtration, the polymer sample was obtained and dried at 80 °C for 24 h under vacuum. The polar

monomer incorporation (mol%) was calculated from NMR analysis. In particular, 30 atm ethylene polymerization takes place in a closed mechanical stirring kettle.

### 2.3 Ligand preparation procedures.

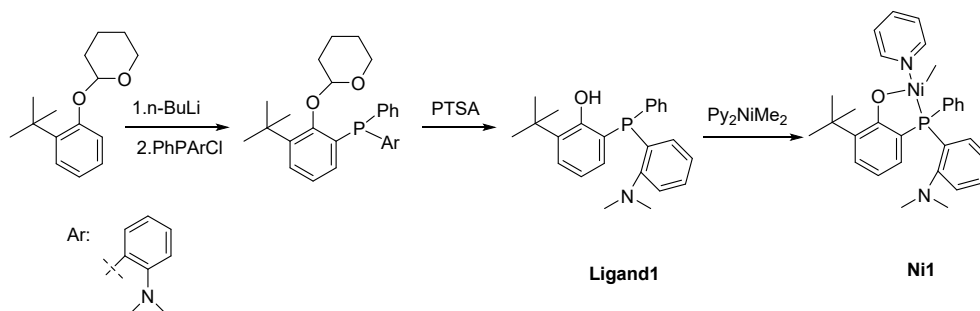

**Ni 1:** Under nitrogen, 2-(2-(*tert*-butyl)phenoxy)tetrahydro-2*H*-pyran (2.34g, 10 mmol) was dissolved in 50 mL of dried THF. *n*-BuLi (4.6 mL, 2.4 M in hexane, 11 mmol, 1.1 equiv) was added dropwise and the reaction mixture was stirred for 2 h at 0 °C. The flask was transferred to a -78 °C bath, and the THF solution of PhPArCl (10 mmol, 1.0 equiv) was added dropwise. The mixture was stirred for 1 hour, and warmed to room temperature to react for 12 hours. After quenching, the suspension was transferred to a round bottom flask and the THF was evaporated on a rotary evaporator. The crude material was then extracted with DCM (3 x 200 mL), washed with H<sub>2</sub>O (3 x 100 mL), and then collect the organic phase and dried with Na<sub>2</sub>SO<sub>4</sub>. After filtration and concentration, the crude product of the protected ligand can be obtained, which can be directly used for the next reaction without further purification. Then, the protected ligand was dissolved in methanol under nitrogen, 3.0 eq of *p*-toluenesulfonic acid was added to react for 6 hours. Then, the reaction solution was evaporated with a rotary evaporator to evaporate methanol, the crude material was then extracted with DCM (3 x 200 mL), washed with H<sub>2</sub>O (3 x 100 mL), and then collect the organic phase and dried with Na<sub>2</sub>SO<sub>4</sub>. After filtration and concentration, the pure ligand 1 was obtained by column chromatography as a white solid (1.80 g, 48%). Under nitrogen, a toluene solution of 1 mmol (377 mg) of the ligand and 1.2 eq Py<sub>2</sub>NiMe<sub>2</sub> was stirred for 1 hour at room temperature. After concentrating, adding *n*hexane for recrystallization resulted in the formation of **Ni 1** (428 mg, 81%) as a yellow solid.

**Ligand 1:**  $^1\text{H}$  NMR (400 MHz,  $\text{CDCl}_3$ )  $\delta$  7.68 (s, 1H), 7.43 – 7.28 (m, 6H), 7.23 – 7.15 (m, 1H), 7.11 (s, 2H), 6.91 (s, 1H), 6.76 (t,  $J = 7.5$  Hz, 1H), 2.54 (s, 6H), 1.42 (s, 9H).  $^{31}\text{P}$  NMR (162 MHz,  $\text{CDCl}_3$ )  $\delta$  -41.48.  $^{13}\text{C}$  NMR (101 MHz,  $\text{CDCl}_3$ )  $\delta$  157.61, 157.40, 132.15, 131.98, 128.97, 127.29, 127.22, 127.18, 127.04, 121.19, 120.40, 120.37, 118.90, 118.89, 76.30, 75.98, 75.67, 44.34, 44.31. ESI-MS ( $m/z$ ):  $[\text{M}+\text{H}]^+$  Calcd for  $\text{C}_{24}\text{H}_{29}\text{ONP}$ , 378.19813; Found: 378.19809.

**Ni 1:**  $^1\text{H}$  NMR (400 MHz,  $\text{C}_6\text{D}_6$ )  $\delta$  8.50 (s, 2H), 7.58 (t,  $J = 7.7$  Hz, 2H), 7.19 - 7.01 (m, 2H), 6.79 (s, 5H), 6.54 (s, 2H), 6.24 (d,  $J = 5.8$  Hz, 3H), 2.44 (s, 6H), 1.32 (s, 9H), -0.78 (d,  $J = 4.6$  Hz, 3H).  $^{31}\text{P}$  NMR (162 MHz,  $\text{C}_6\text{D}_6$ )  $\delta$  13.36.  $^{13}\text{C}$  NMR (101 MHz,  $\text{C}_6\text{D}_6$ )  $\delta$  173.98, 173.77, 157.25, 157.14, 137.11, 137.02, 132.60, 131.84, 131.75, 130.10, 129.48, 126.88, 126.64, 126.39, 123.62, 123.54, 122.11, 122.05, 118.69, 118.17, 112.08, 112.01, 44.72, 33.87, 28.30, -17.19 (d,  $J = 38.5$  Hz, Ni-Me). Anal. Calcd for  $\text{C}_{30}\text{H}_{36}\text{N}_2\text{NiOP}$ : C, 67.95; H, 6.84; N, 5.28. Found: C, 67.76; H, 6.87; N, 5.33.

**Ni 2:** A procedure similar to the **Ni 1**;

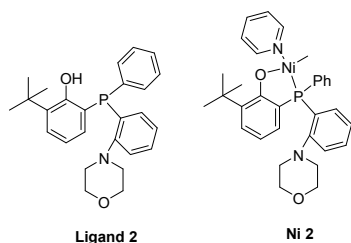

**Ligand 2** (10mmol, 1.90g, 46%):  $^1\text{H}$  NMR (400 MHz,  $\text{CDCl}_3$ )  $\delta$  7.47 - 7.34 (m, 7H), 7.31 (dd,  $J = 7.5, 1.8$  Hz, 1H), 7.22 (m,  $J = 7.8, 4.7, 0.9$  Hz, 1H), 7.12 (t,  $J = 7.5$  Hz, 1H), 6.94 (m,  $J = 7.6, 4.7, 1.5$  Hz, 1H), 6.87 - 6.75 (m, 2H), 3.59 (t,  $J = 4.4$  Hz, 4H), 2.97 - 2.84 (m, 2H), 2.63 (d,  $J = 10.5$  Hz, 2H), 1.46 (s, 9H).  $^{31}\text{P}$  NMR (162 MHz,  $\text{CDCl}_3$ )  $\delta$  -41.83.  $^{13}\text{C}$  NMR (101 MHz,  $\text{CDCl}_3$ )  $\delta$  158.27, 158.06, 155.19, 155.03, 135.95, 133.85, 133.66, 133.06, 132.46, 130.18, 128.77, 128.60, 128.53, 125.98, 125.96, 122.43, 122.41, 120.14, 120.11, 77.40, 77.08, 76.76, 67.19, 52.82, 34.98, 34.96, 29.62. ESI-MS ( $m/z$ ):  $[\text{M}+\text{H}]^+$  Calcd for  $\text{C}_{26}\text{H}_{31}\text{O}_2\text{NP}$ , 420.20869; Found: 420.20844.

**Ni 2** (1mmol, 468 mg, 82%):  $^1\text{H}$  NMR (400 MHz,  $\text{C}_6\text{D}_6$ )  $\delta$  8.49 (s, 2H), 7.66 (dd,  $J =$



8.3, 4.8 Hz, 2H), 7.08 - 6.94 (m, 2H), 6.89 - 6.75 (m, 7H), 6.63 (s, 1H), 6.51 (s, 2H), 6.26 - 6.12 (m, 3H), 4.19 - 3.68 (m, 4H), 2.84 (s, 2H), 2.45 (s, 2H), 1.29 (s, 9H), -0.78 (d,  $J = 4.9$  Hz, 3H).  $^{31}\text{P}$  NMR (162 MHz,  $\text{C}_6\text{D}_6$ )  $\delta$  18.72.  $^{13}\text{C}$  NMR (101 MHz,  $\text{C}_6\text{D}_6$ )  $\delta$  156.64, 156.55, 138.26, 138.17, 134.64, 134.61, 133.26, 133.17, 131.60, 131.54, 131.53, 129.92, 129.25, 129.23, 129.00, 128.49, 128.40, 127.95, 127.83, 127.71, 127.59, 127.46, 125.25, 125.17, 124.05, 123.99, 121.13, 113.15, 113.08, 67.34, 53.97, 34.89, 34.87, 29.44, -15.82 (d,  $J = 39.2$  Hz, Ni-Me). Anal. Calcd for  $\text{C}_{32}\text{H}_{38}\text{N}_2\text{NiO}_2\text{P}$ : C, 67.16; H, 6.69; N, 4.89. Found: C, 67.02; H, 6.77; N, 4.92.

**Ni 3:** A procedure similar to the Ni 1;

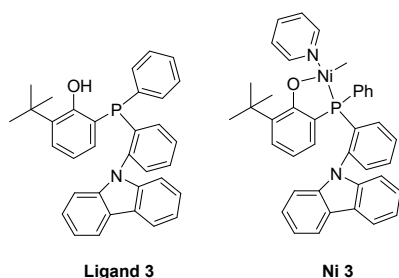

**Ligand 3** (10mmol, 2.25g, 45%):  $^1\text{H}$  NMR (400 MHz,  $\text{CDCl}_3$ )  $\delta$  8.03 (dd,  $J = 17.7, 7.5$  Hz, 2H), 7.57 (d,  $J = 7.5$  Hz, 1H), 7.50 (s, 1H), 7.38 (d,  $J = 16.1$  Hz, 2H), 7.31 (s, 1H), 7.26 - 7.20 (m, 4H), 7.20 - 7.10 (m, 5H), 7.04 (d,  $J = 8.1$  Hz, 1H), 6.88 (dd,  $J = 6.8, 5.7$  Hz, 1H), 6.73 (t,  $J = 7.6$  Hz, 1H), 6.64 (d,  $J = 8.0$  Hz, 1H), 1.19 (s, 9H).  $^{31}\text{P}$  NMR (162 MHz,  $\text{CDCl}_3$ )  $\delta$  -44.19.  $^{13}\text{C}$  NMR (101 MHz,  $\text{CDCl}_3$ )  $\delta$  158.54, 158.32, 133.63, 133.44, 128.50, 128.43, 125.46, 120.17, 119.95, 119.67, 119.64, 77.35, 77.24, 77.04, 76.72, 34.68, 34.66, 29.35. ESI-MS ( $m/z$ ):  $[\text{M}+\text{H}]^+$  Calcd for  $\text{C}_{34}\text{H}_{30}\text{NOP}$ , 500.21378; Found: 500.21375.

**Ni 3** (1mmol, 527 mg, 81%):  $^1\text{H}$  NMR (400 MHz,  $\text{C}_6\text{D}_6$ )  $\delta$  8.06 - 7.97 (m, 2H), 7.75 (dd,  $J = 23.7, 13.9$  Hz, 6H), 7.43 - 7.22 (m, 4H), 7.03 (m,  $J = 40.8, 21.5, 5.6$  Hz, 8H), 6.77 - 6.56 (m, 4H), 6.33 (s, 2H), 1.30 (d,  $J = 3.4$  Hz, 9H), -0.83 (t,  $J = 4.4$  Hz, 3H).  $^{31}\text{P}$  NMR (162 MHz,  $\text{C}_6\text{D}_6$ )  $\delta$  -18.94.  $^{13}\text{C}$  NMR (101 MHz,  $\text{C}_6\text{D}_6$ )  $\delta$  149.09, 143.00, 142.61, 137.59, 134.83, 134.10, 133.08, 131.79, 131.70, 130.80, 128.95, 128.26, 127.56, 127.46, 127.09, 126.85, 126.61, 125.13, 124.24, 123.84, 122.95, 121.55, 119.02, 118.79, 118.43, 116.82, 112.59, 111.71, 110.76, 33.77, 28.43, -14.59 (d,  $J =$

36.3 Hz, Ni-Me). Anal. Calcd for C<sub>40</sub>H<sub>38</sub>N<sub>2</sub>NiOP: C, 73.64; H, 5.87; N, 4.29. Found: C, 73.52; H, 5.78; N, 4.22.

### 3. <sup>1</sup>H NMR and <sup>13</sup>C NMR of the ligands and catalyst

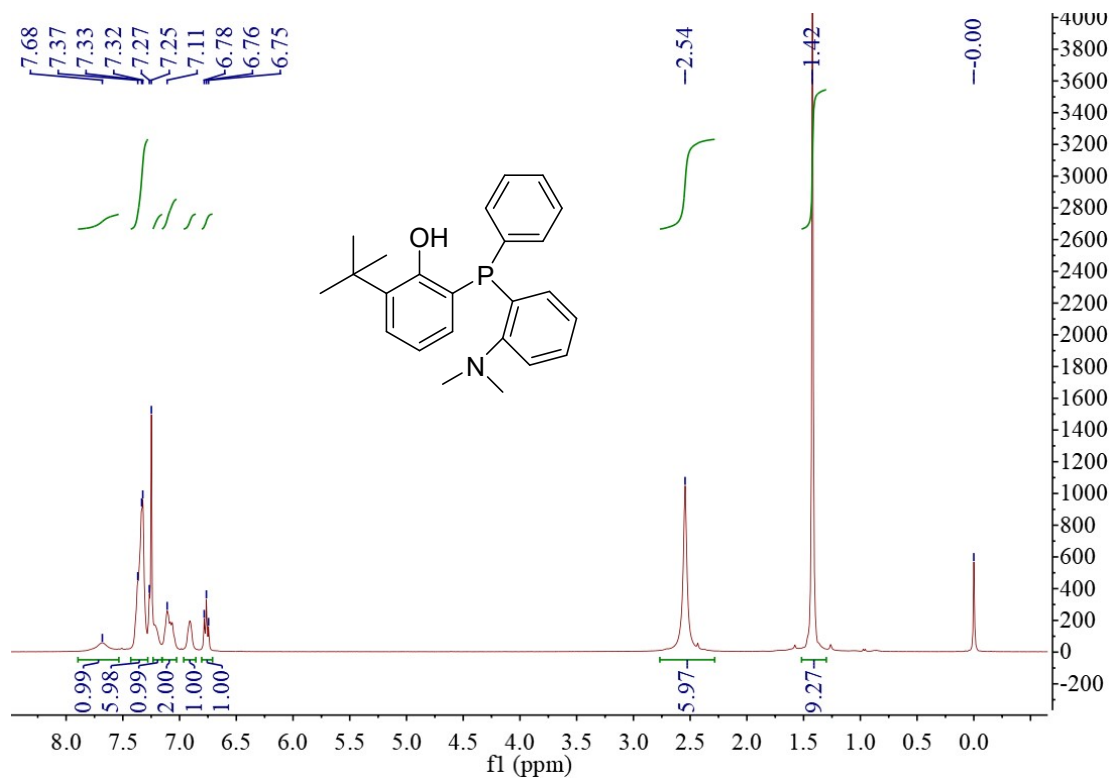

Figure S9 <sup>1</sup>H NMR spectrum of L1. (400 MHz, CDCl<sub>3</sub>).

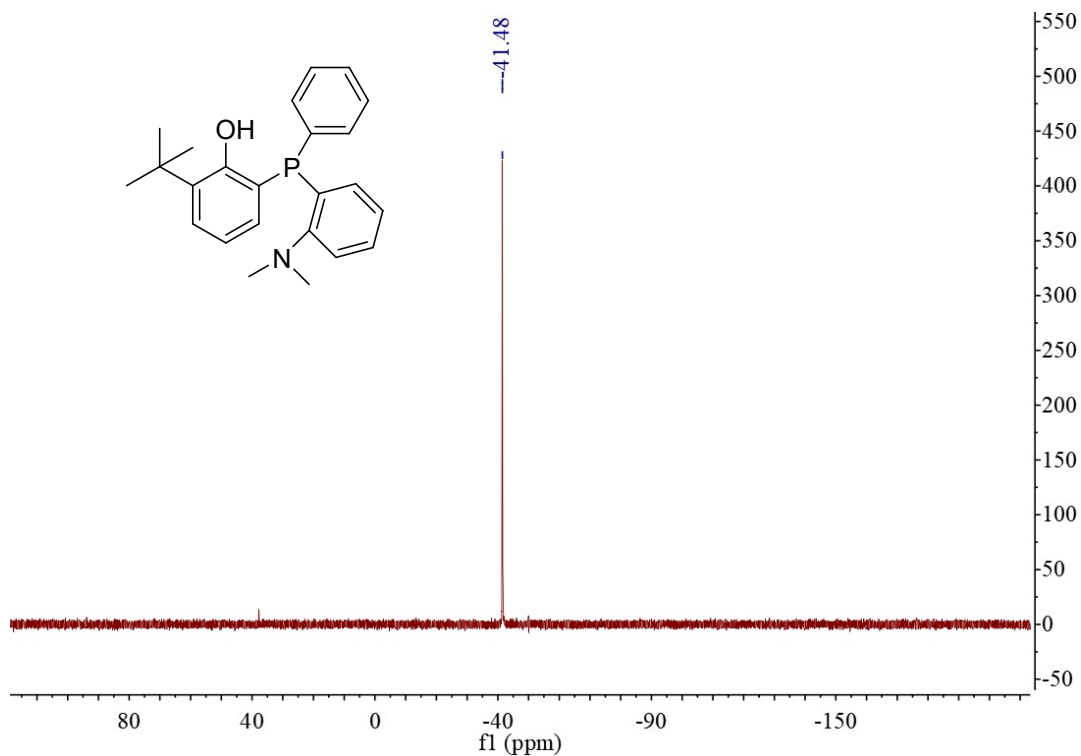

Figure S10 <sup>31</sup>P NMR spectrum of L1. (162 MHz, CDCl<sub>3</sub>).

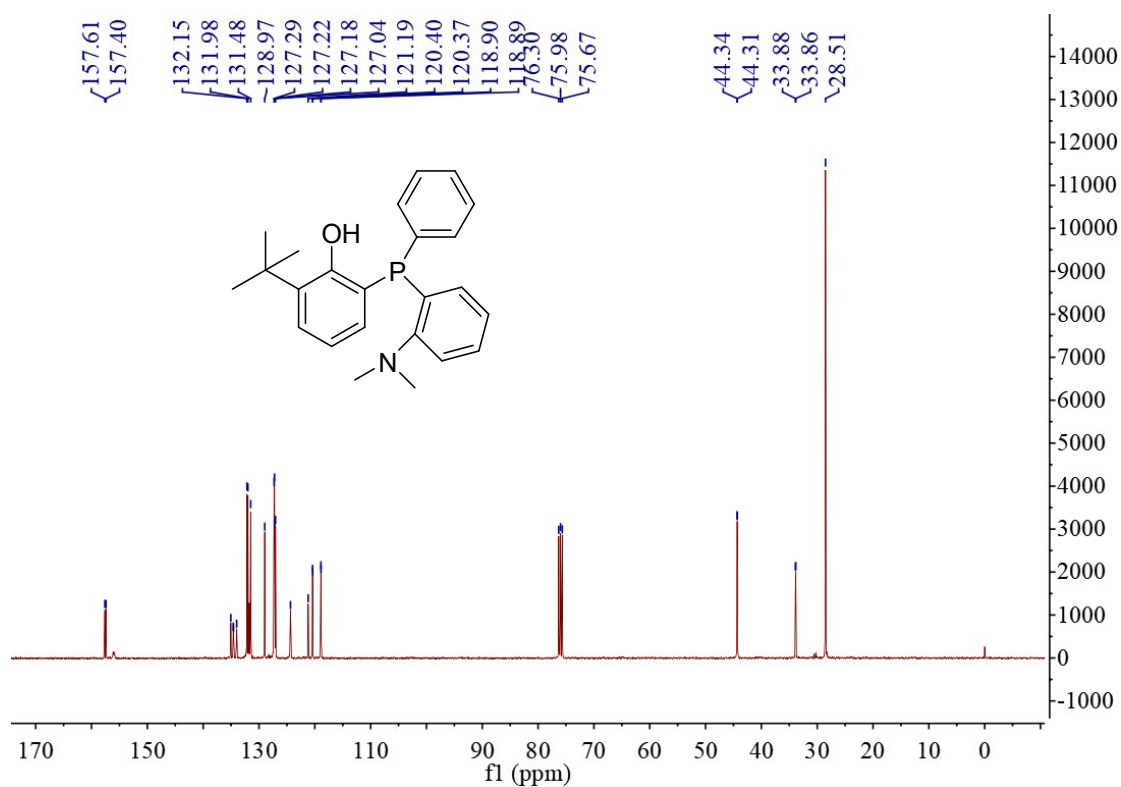

Figure S11 <sup>13</sup>C NMR spectrum of L1. (101 MHz, CDCl<sub>3</sub>).

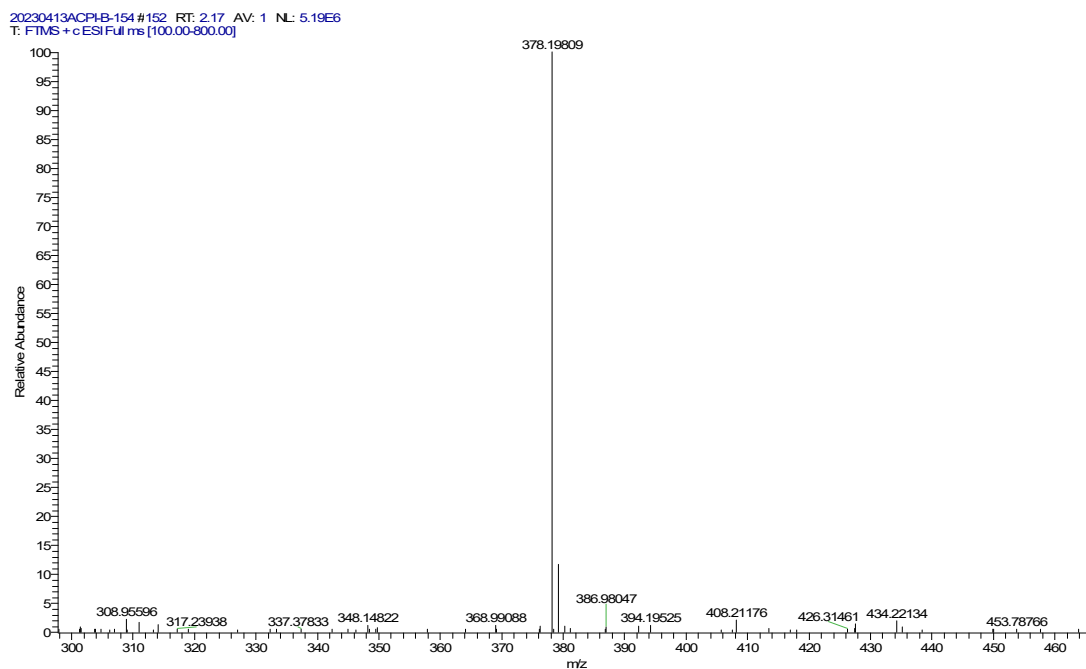

Figure S12 ESI-MS spectrum of L1.

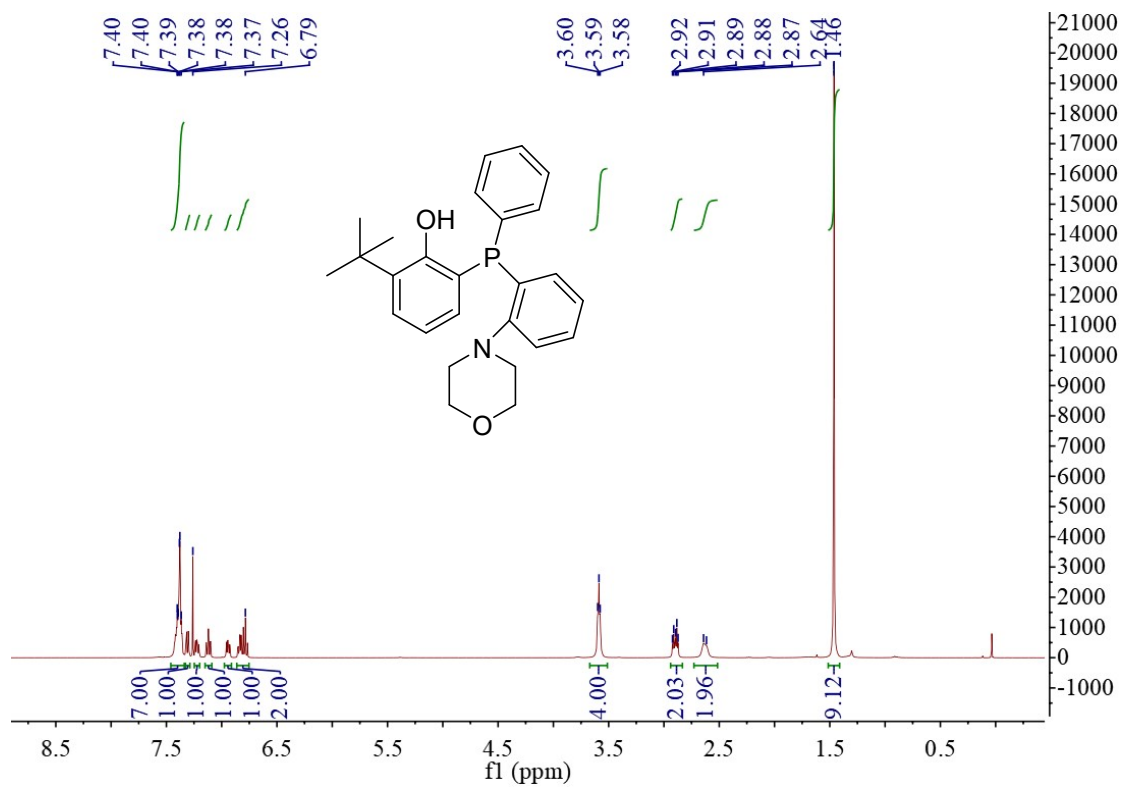

**Figure S13** <sup>1</sup>H NMR spectrum of **L2**. (400 MHz, CDCl<sub>3</sub>).

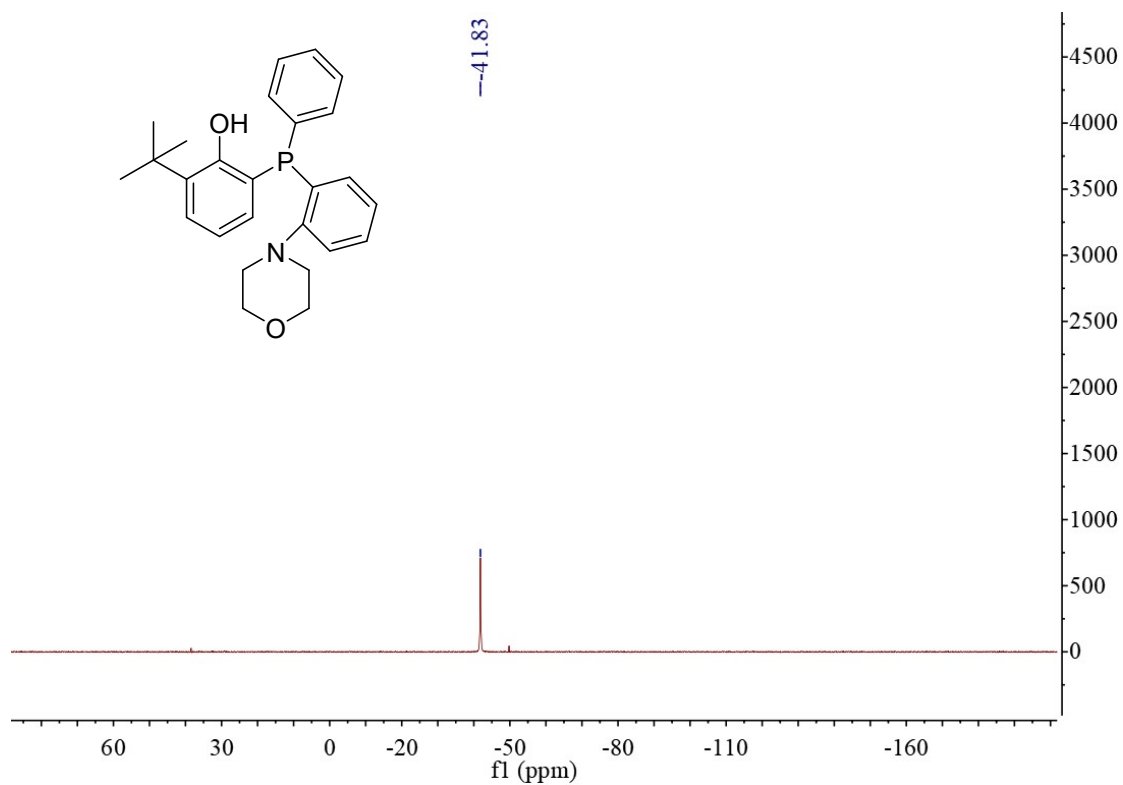

**Figure S14** <sup>31</sup>P NMR spectrum of **L2**. (162 MHz, CDCl<sub>3</sub>).

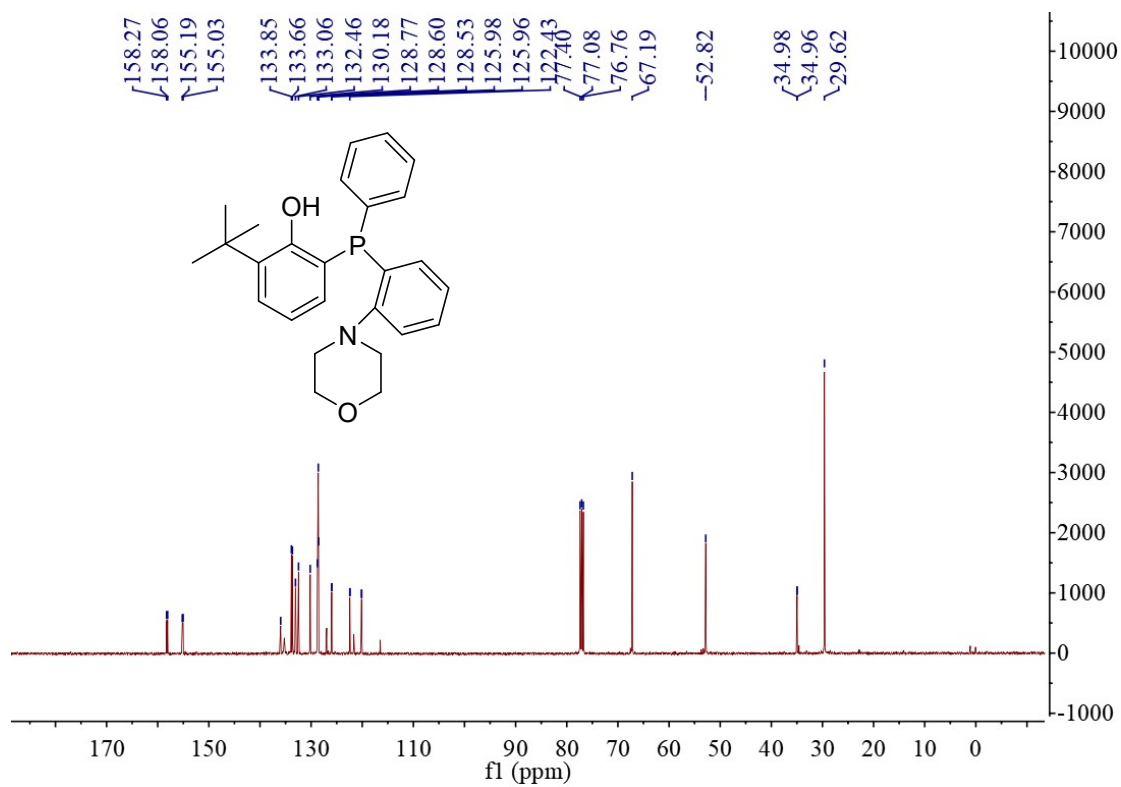

**Figure S15** <sup>13</sup>C NMR spectrum of **L2**. (101 MHz, CDCl<sub>3</sub>).

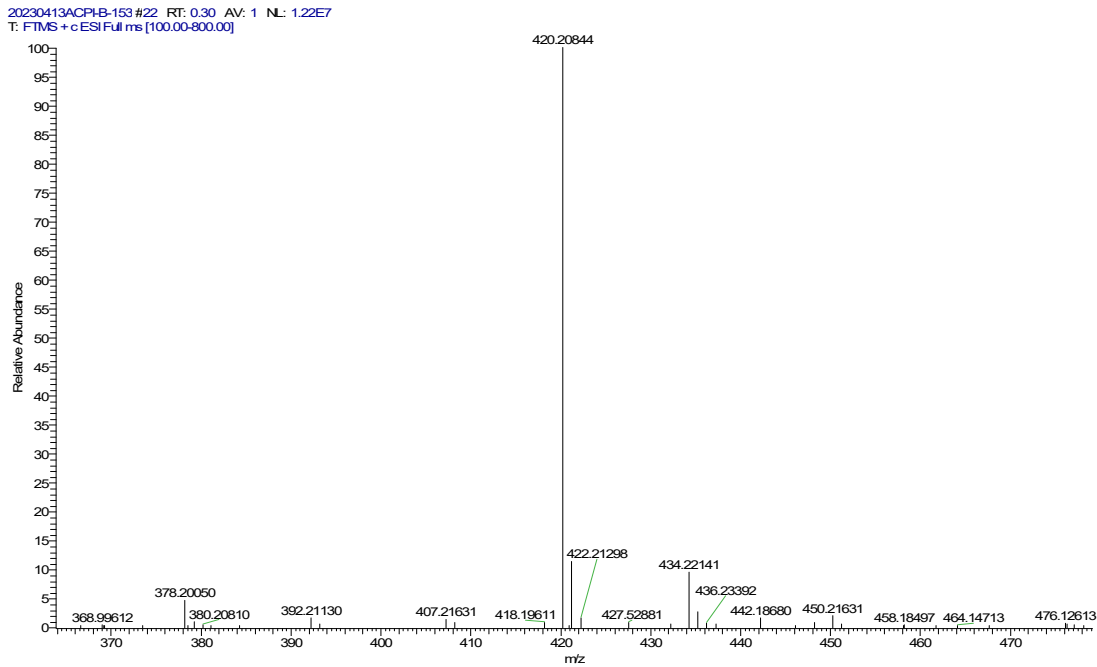

**Figure S16** ESI-MS spectrum of **L2**.

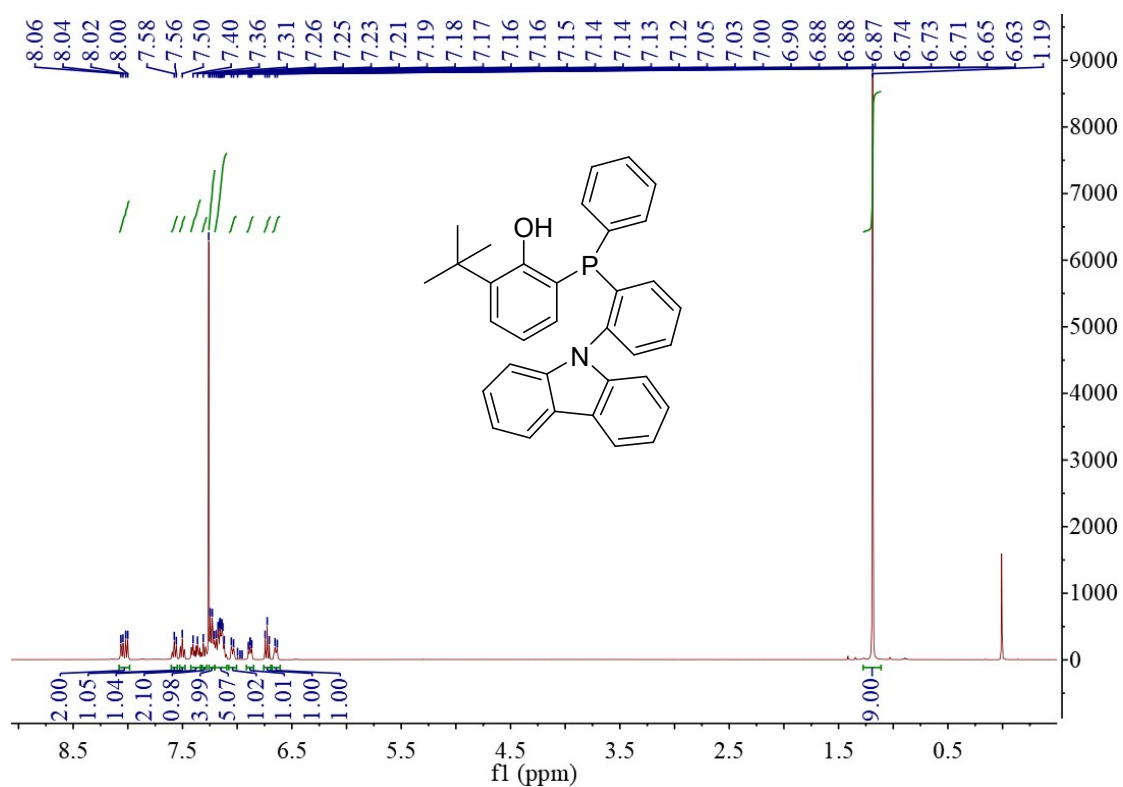

Figure S17  $^1\text{H}$  NMR spectrum of L3. (400 MHz,  $\text{CDCl}_3$ ).

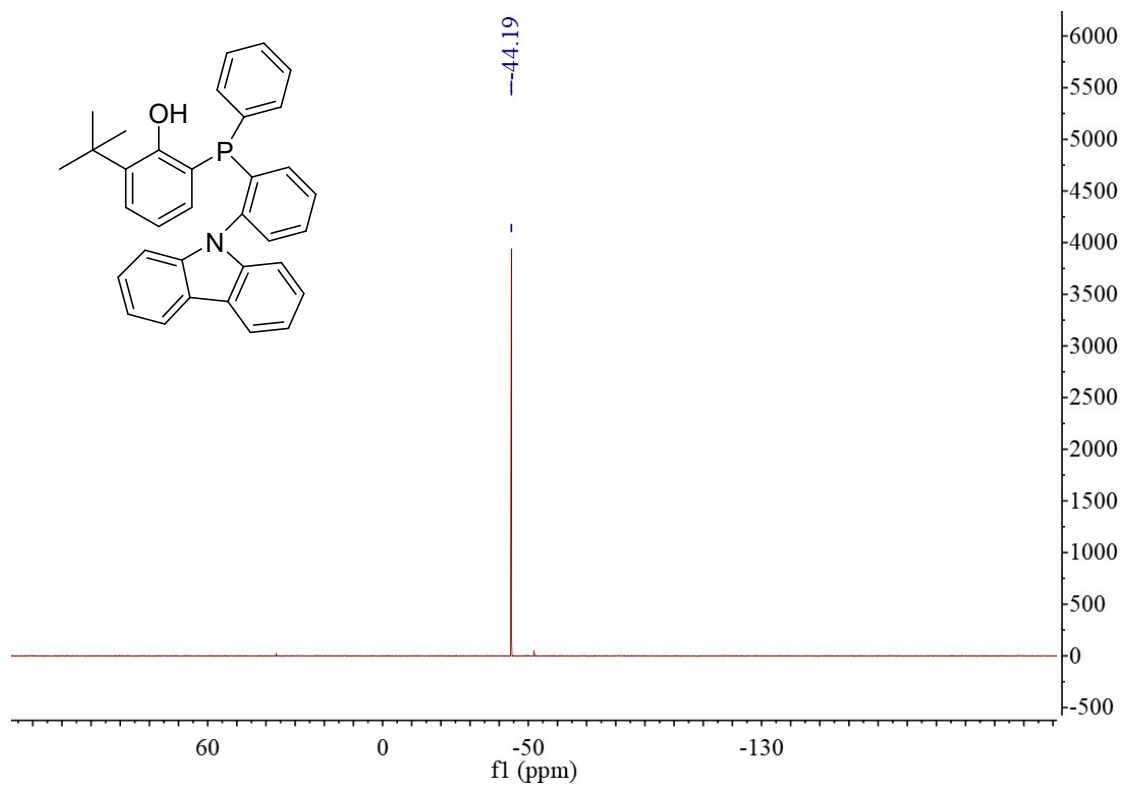

Figure S18  $^{31}\text{P}$  NMR spectrum of L3. (162 MHz,  $\text{CDCl}_3$ ).

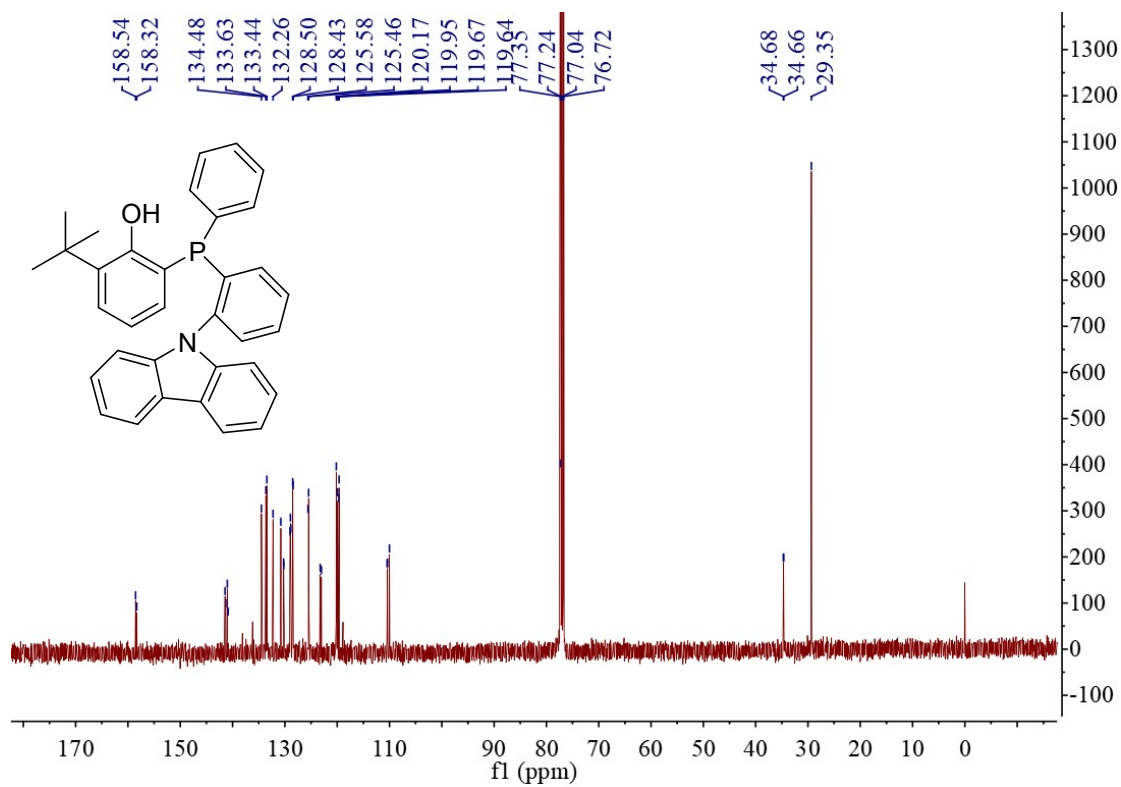

**Figure S19**  $^{13}\text{C}$  NMR spectrum of **L3**. (101 MHz,  $\text{CDCl}_3$ ).

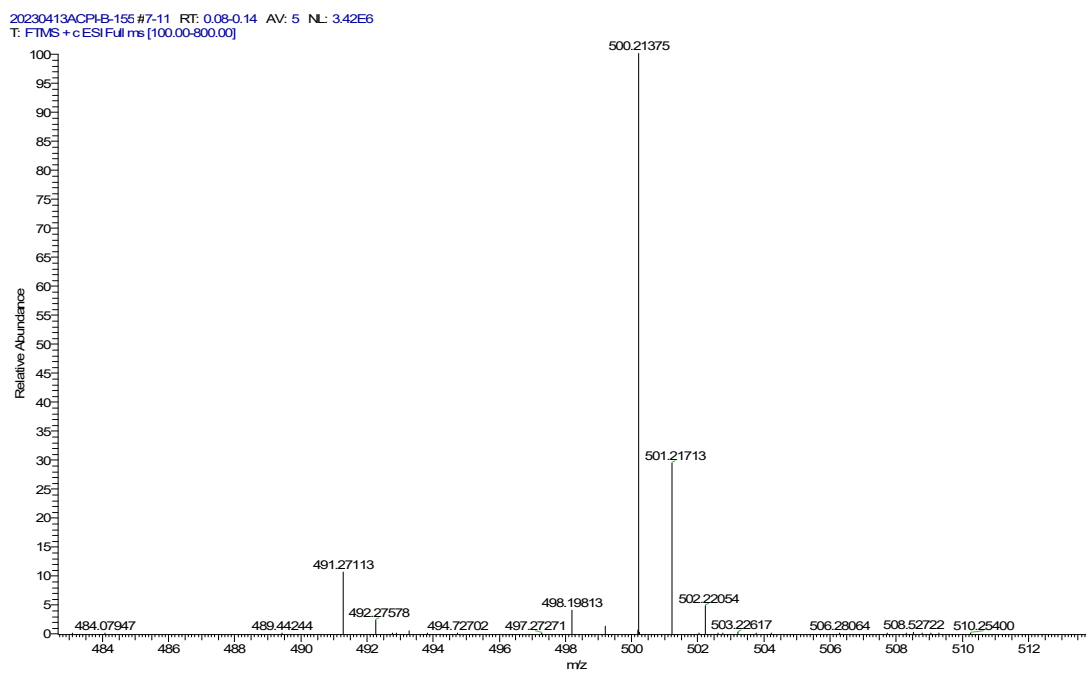

**Figure S20** ESI-MS spectrum of **L3**.

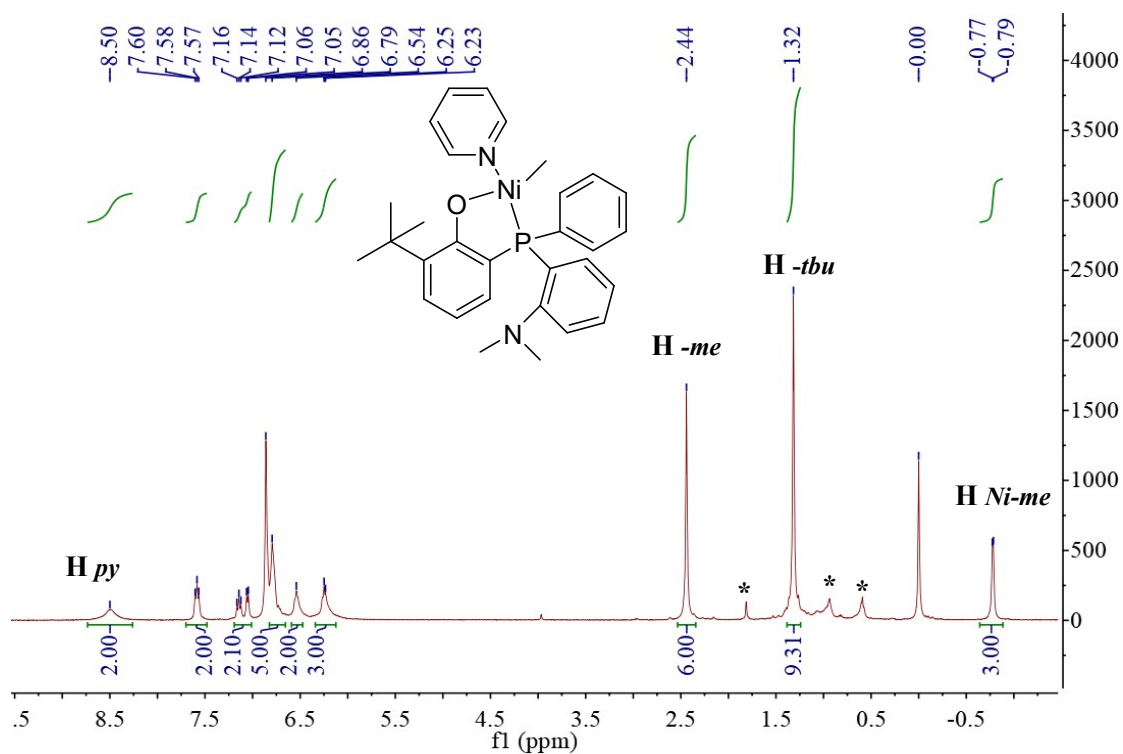

Figure S21  $^1\text{H}$  NMR spectrum of Ni1. (400 MHz,  $\text{C}_6\text{D}_6$ ). (\*solution)

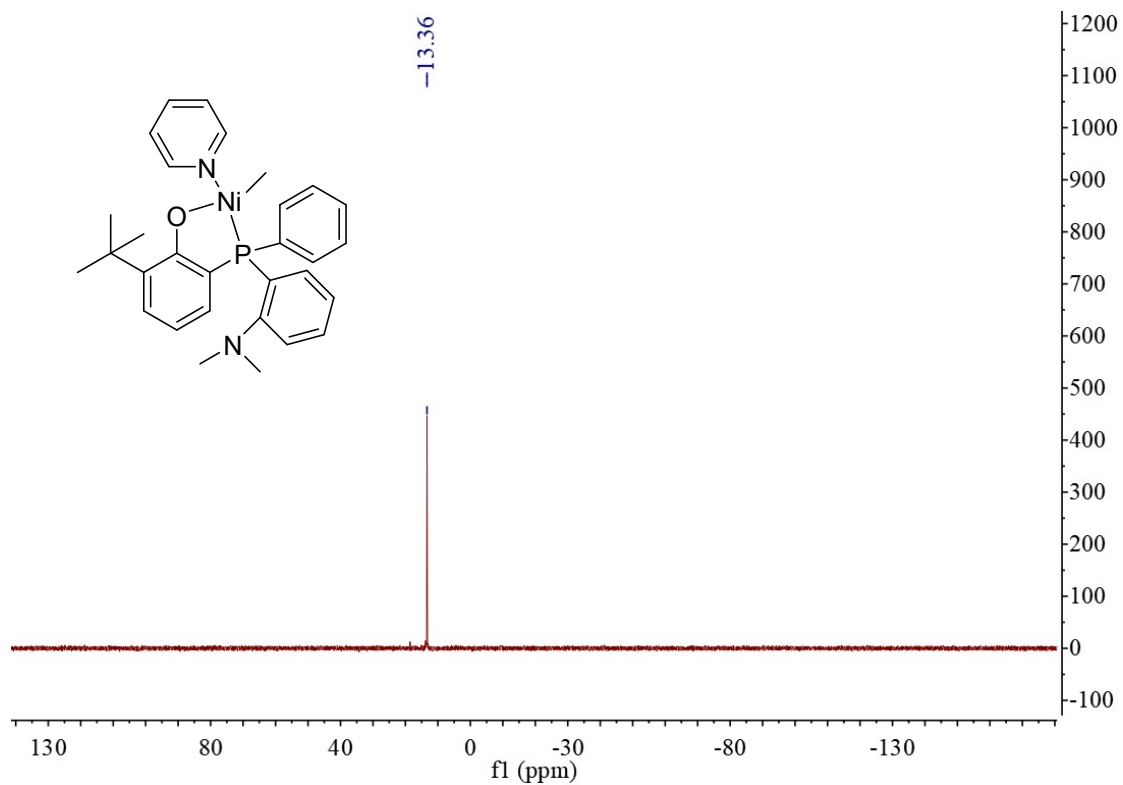

Figure S22  $^{31}\text{P}$  NMR spectrum of Ni1. (162 MHz,  $\text{C}_6\text{D}_6$ ).



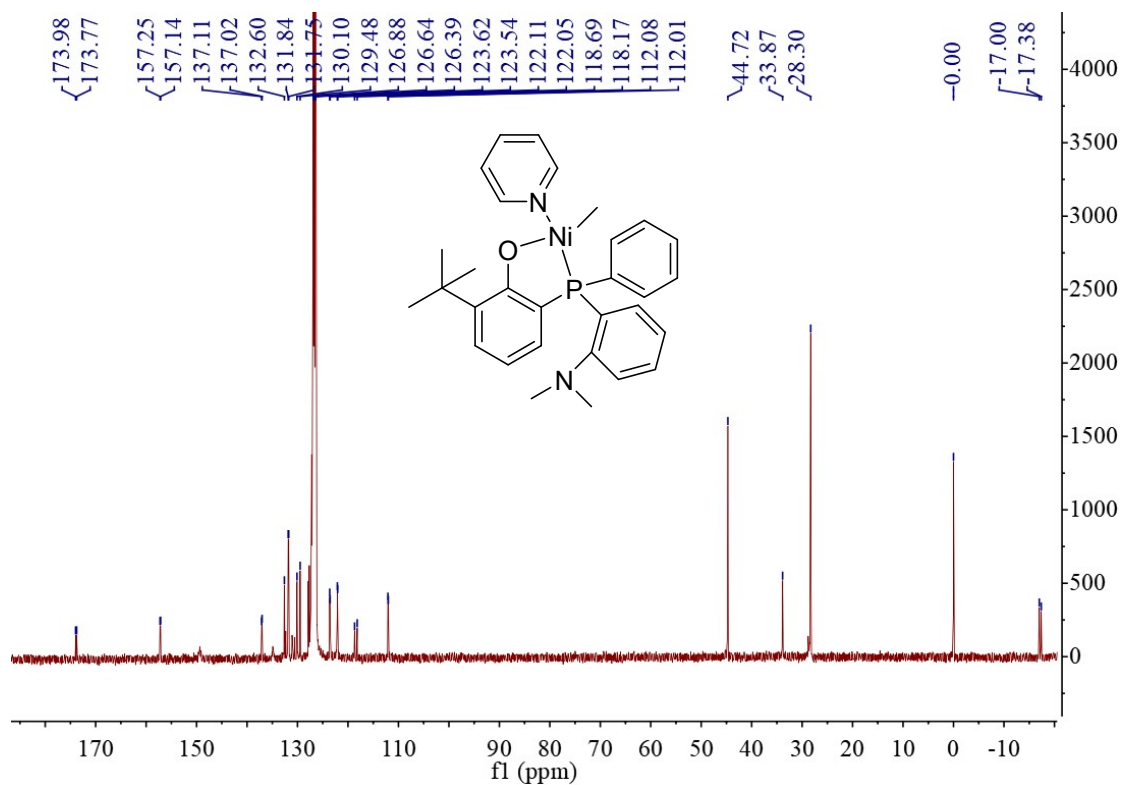

Figure S23  $^{13}\text{C}$  NMR spectrum of Ni1. (101 MHz,  $\text{C}_6\text{D}_6$ ).

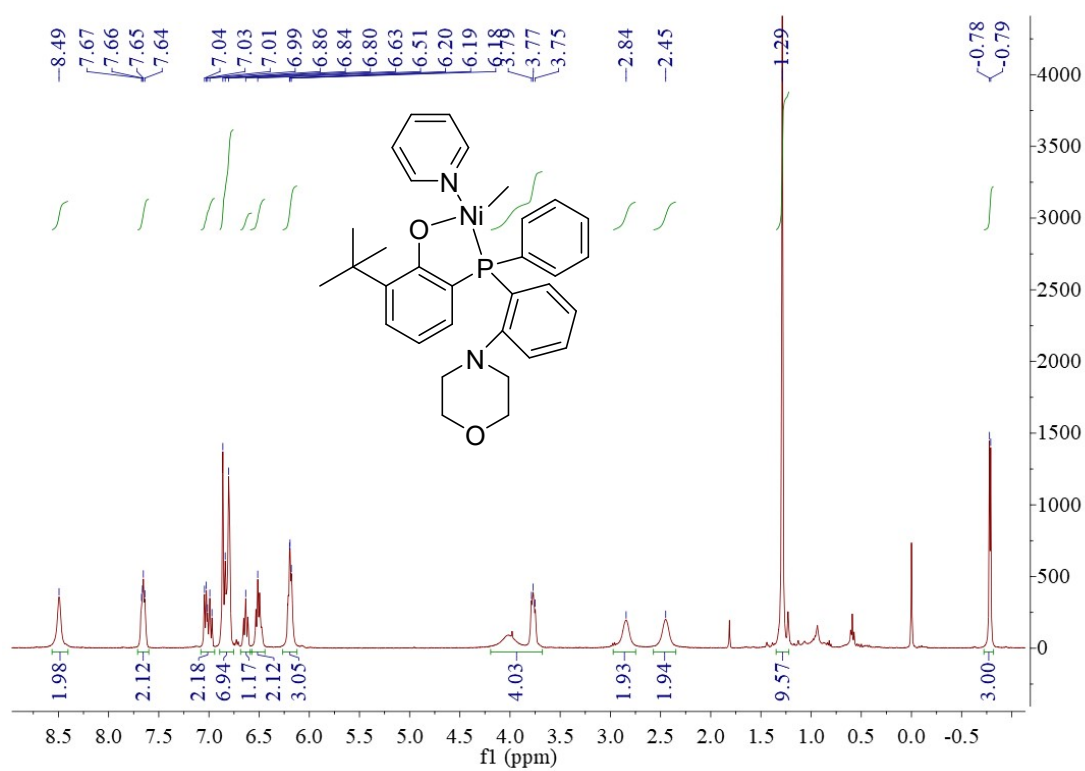

Figure S24  $^1\text{H}$  NMR spectrum of Ni2. (400 MHz,  $\text{C}_6\text{D}_6$ ). (\*solution)

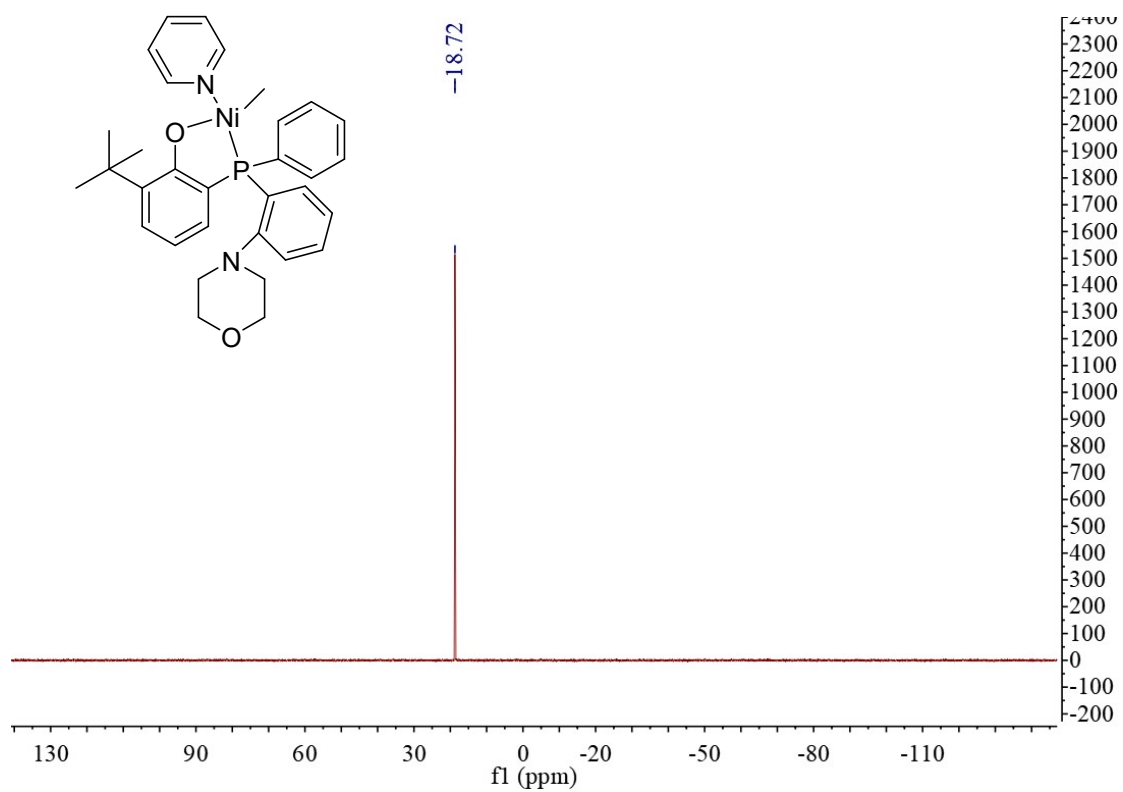

Figure S25 <sup>31</sup>P NMR spectrum of Ni2. (162 MHz, C<sub>6</sub>D<sub>6</sub>).

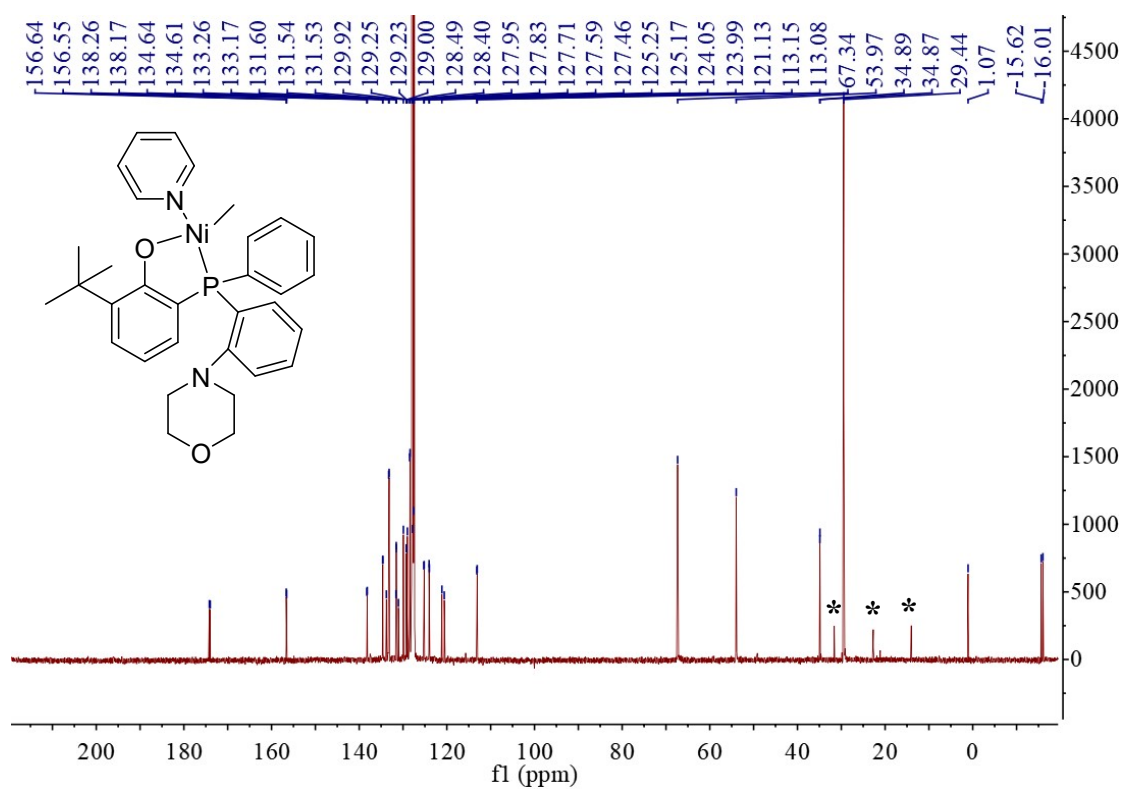

Figure S26 <sup>13</sup>C NMR spectrum of Ni2. (101 MHz, C<sub>6</sub>D<sub>6</sub>). (\*Hex)

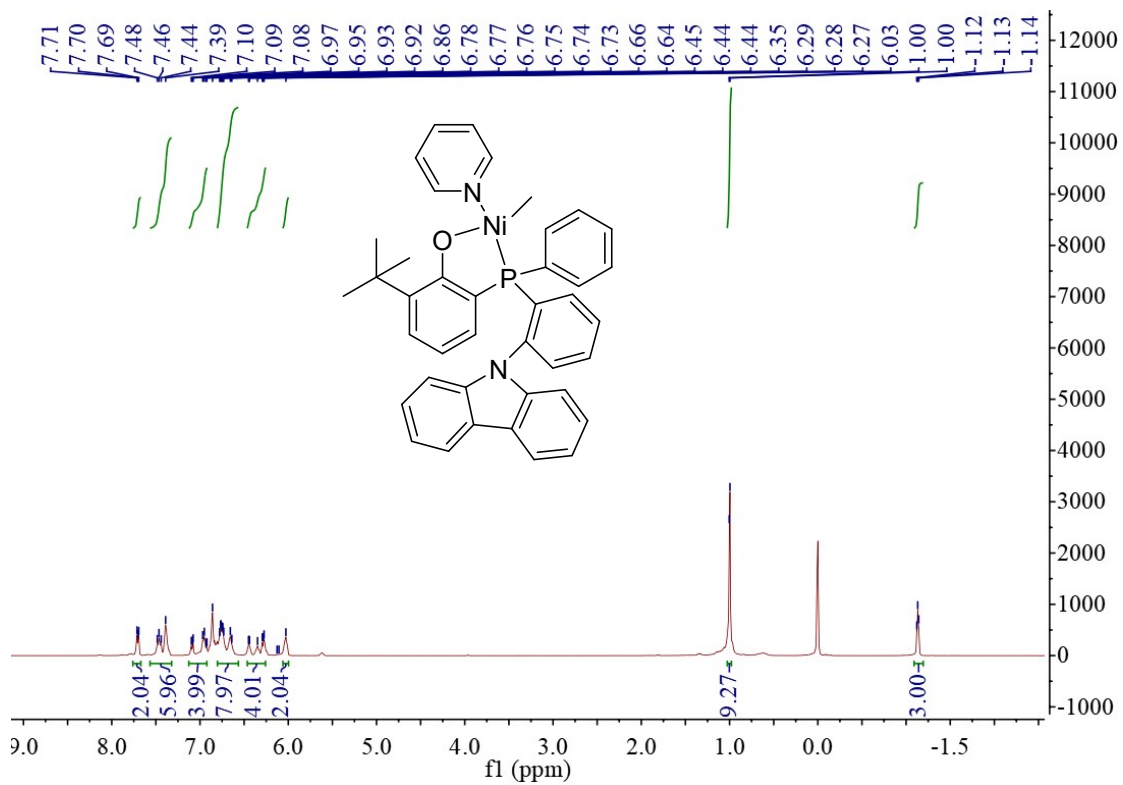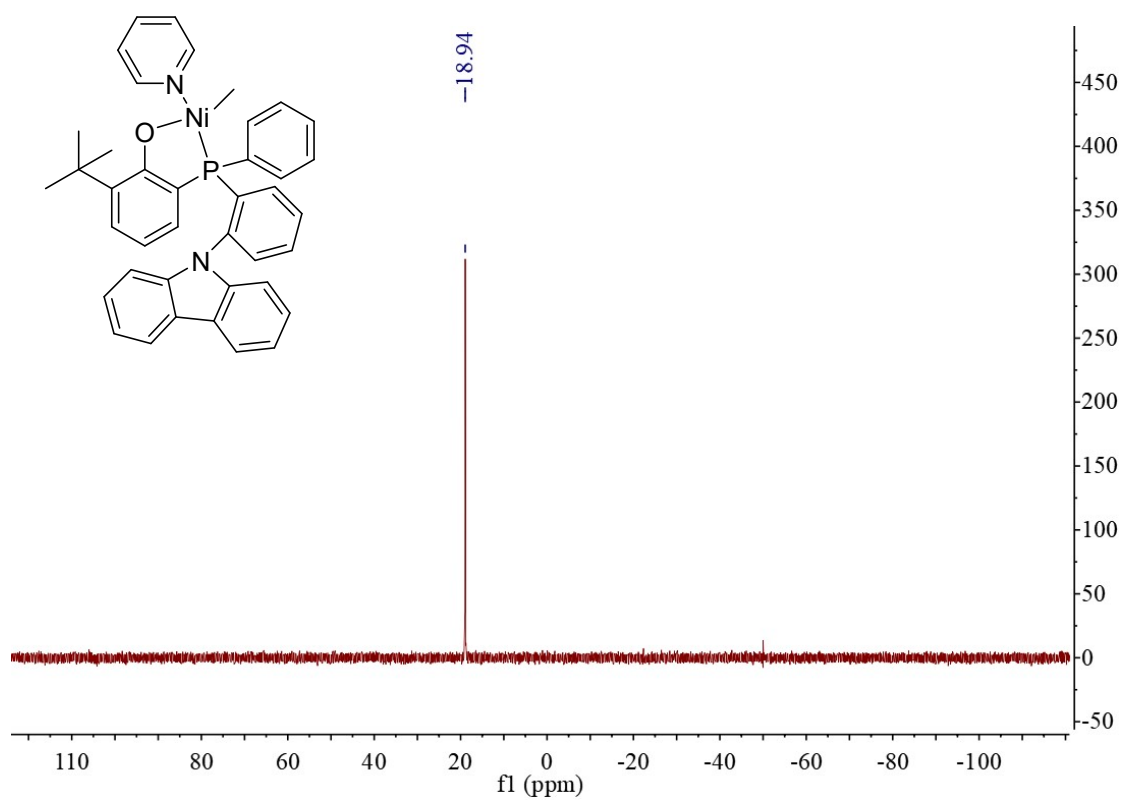

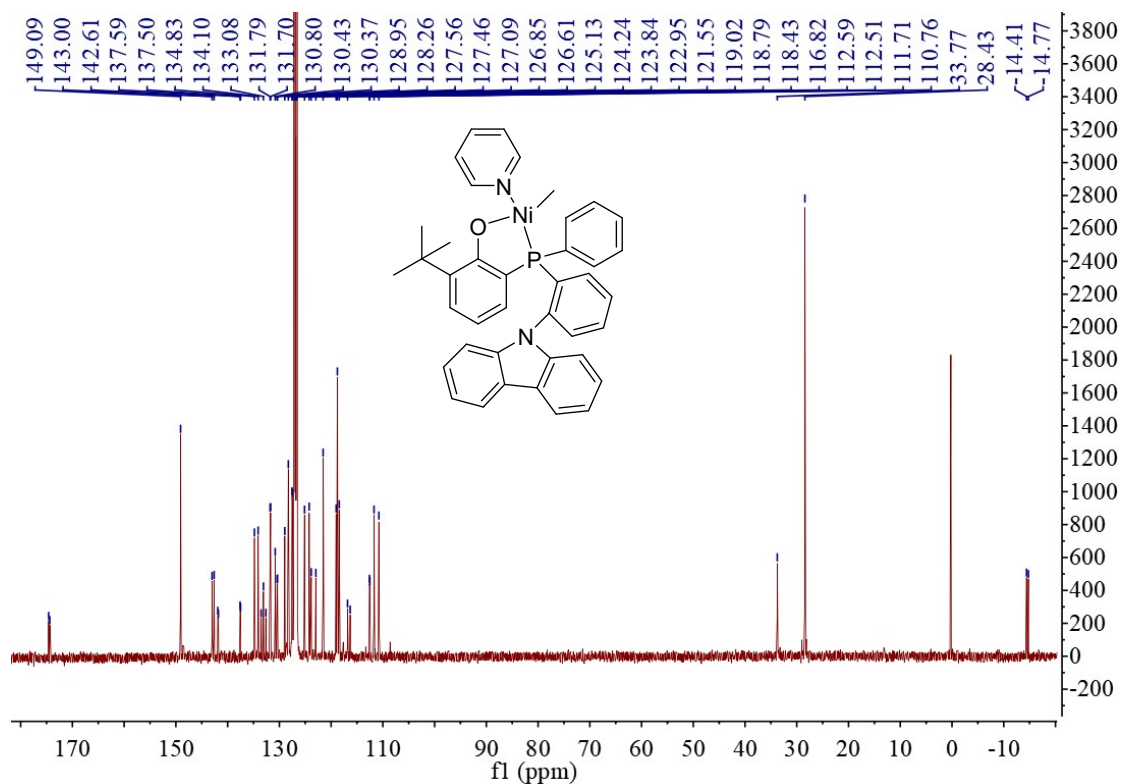

Figure S29  $^{13}\text{C}$  NMR spectrum of Ni3. (101 MHz,  $\text{C}_6\text{D}_6$ ).

#### 4. $^1\text{H}$ NMR of the polymers

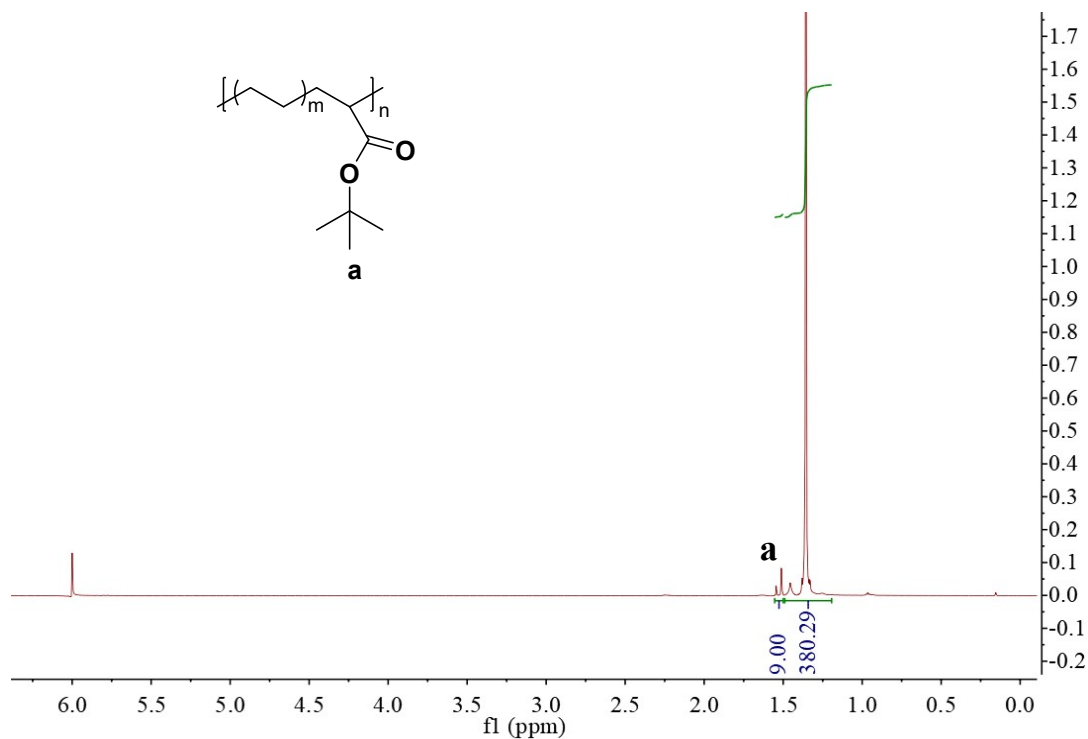

Figure S30  $^1\text{H}$  NMR of the polymer from Table 3, Entry 1. ( $\text{C}_2\text{D}_2\text{Cl}_4$ , 120  $^\circ\text{C}$ )

$$\text{Incorporation (\%)} = \frac{I(a)/9}{\frac{I(a)}{9} + \frac{I(\text{CH}_2) - 3}{4}} * 100\% = 1.0\%$$

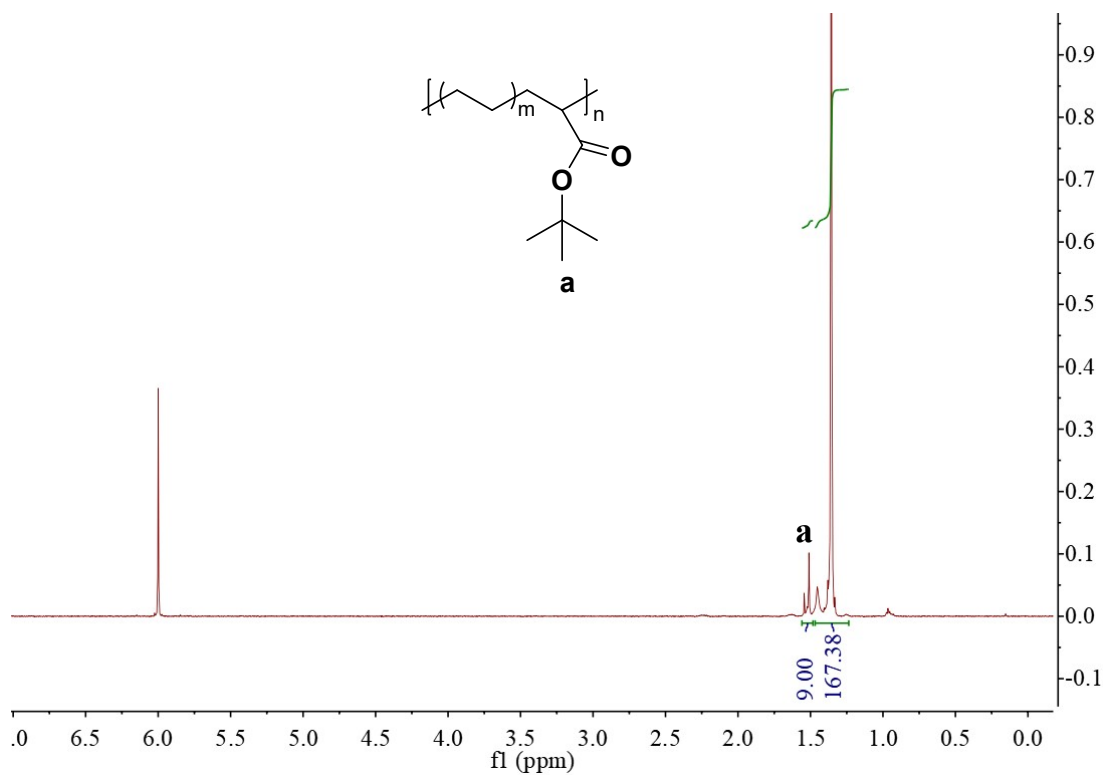

**Figure S31** <sup>1</sup>H NMR of the polymer from Table 3, Entry 2. (C<sub>2</sub>D<sub>2</sub>Cl<sub>4</sub>, 120 °C)

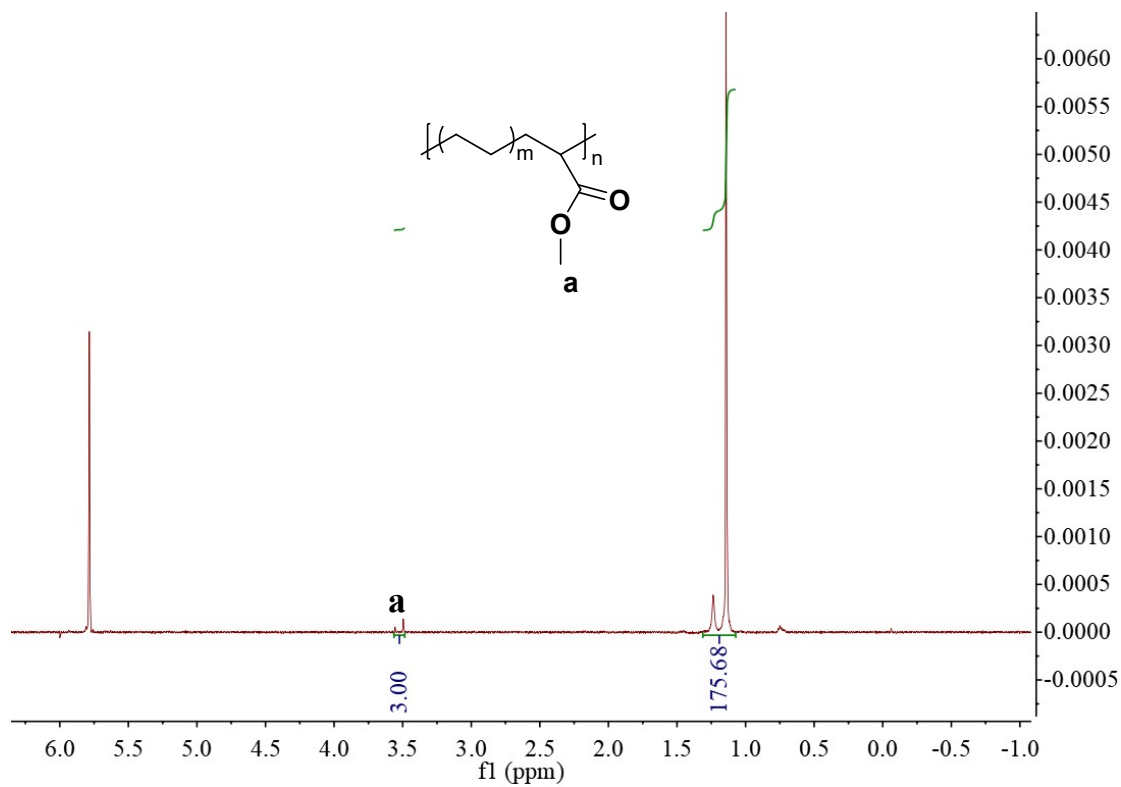

**Figure S32** <sup>1</sup>H NMR of the polymer from Table 3, Entry 3. (C<sub>2</sub>D<sub>2</sub>Cl<sub>4</sub>, 120 °C)

$$\text{Incorporation (\%)} = \frac{\frac{I(a)/3}{\frac{I(a)}{3} + \frac{I(\text{CH}_2) - 3}{4}}} * 100\% = 2.3\%$$

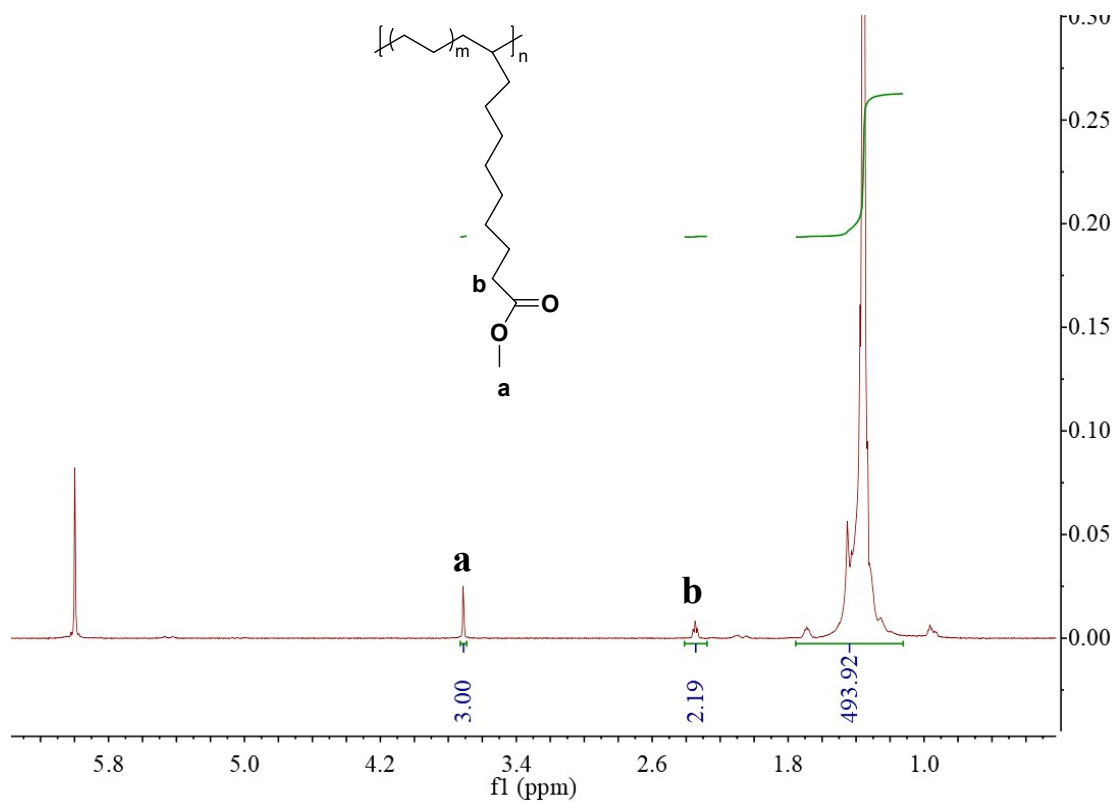

**Figure S33** <sup>1</sup>H NMR of the polymer from Table 3, Entry 4. (C<sub>2</sub>D<sub>2</sub>Cl<sub>4</sub>, 120 °C)

$$\text{Incorporation (\%)} = \frac{\frac{I(a)/3}{\frac{I(a)}{3} + \frac{I(\text{CH}_2) - 17}{4}}} * 100\% = 0.8\%$$

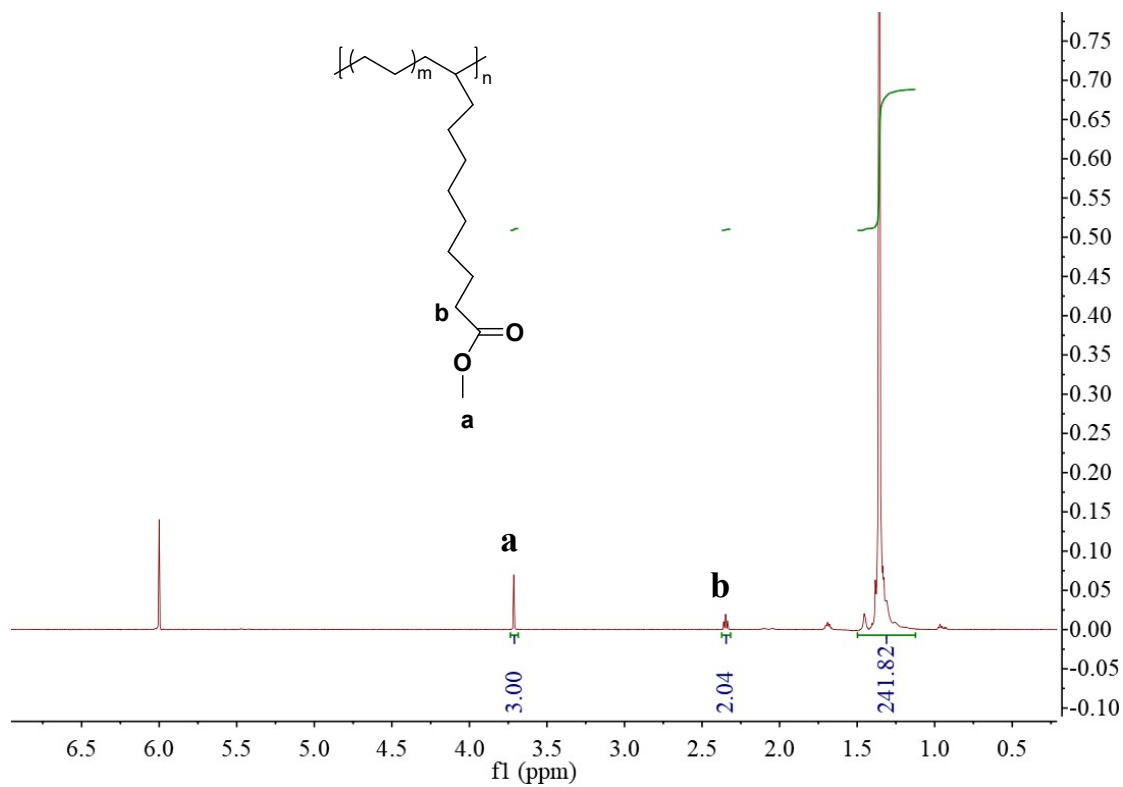

**Figure S34** <sup>1</sup>H NMR of the polymer from Table 3, Entry 5. (C<sub>2</sub>D<sub>2</sub>Cl<sub>4</sub>, 120 °C)

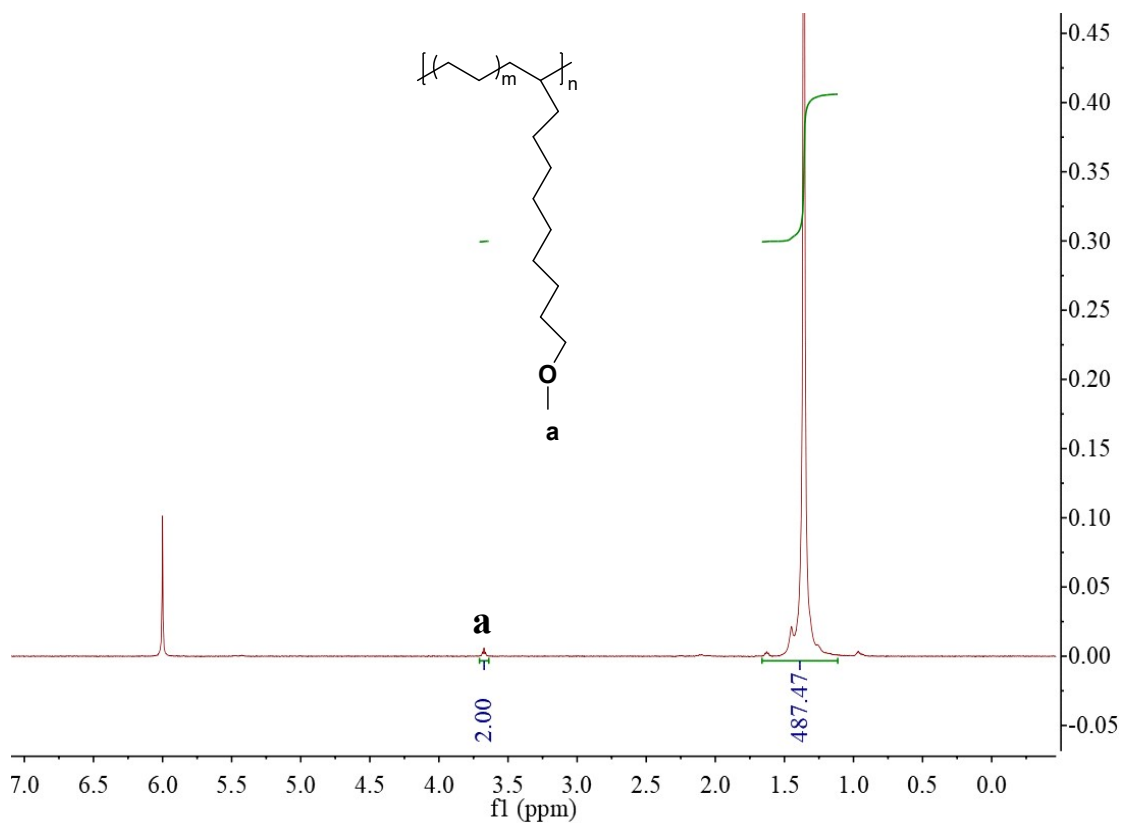

**Figure S35** <sup>1</sup>H NMR of the polymer from Table 3, Entry 7. (C<sub>2</sub>D<sub>2</sub>Cl<sub>4</sub>, 120 °C)

$$\text{Incorporation (\%)} = \frac{\frac{I(a)/2}{\frac{I(a)}{2} + \frac{I(\text{CH}_2) - 17}{4}}}{2} * 100\% = 0.8\%$$

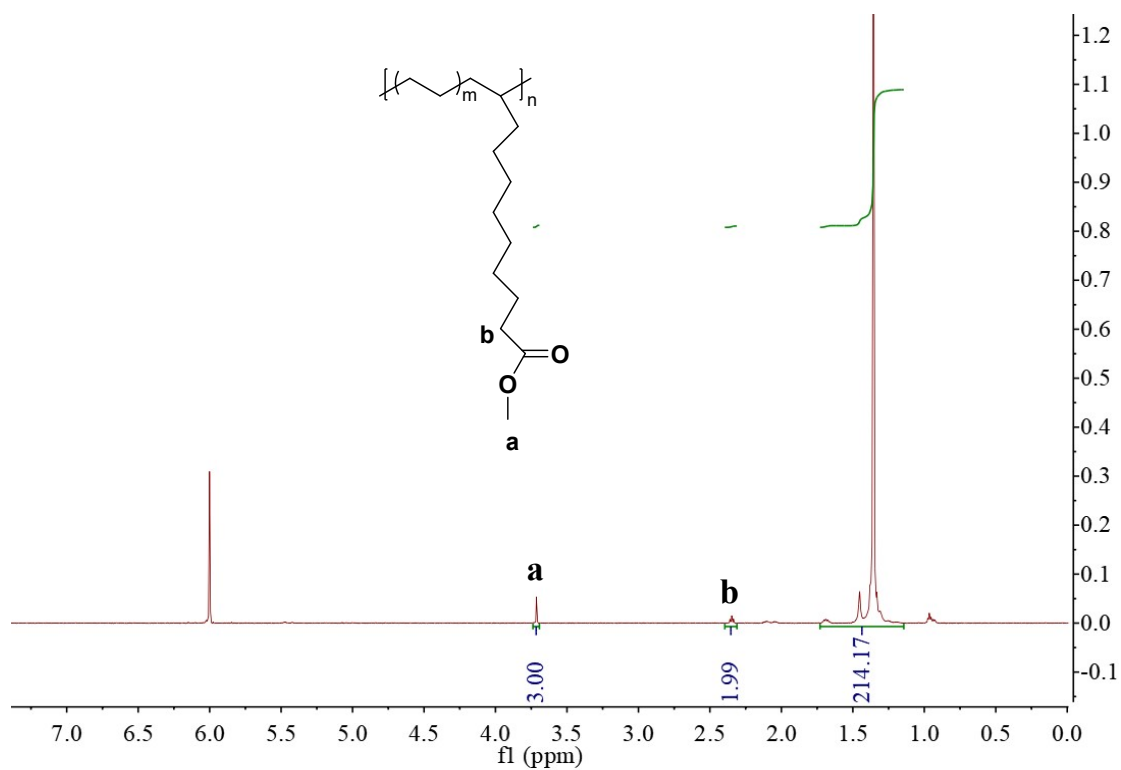

**Figure S36** <sup>1</sup>H NMR of the polymer from Table 3, Entry 8. (C<sub>2</sub>D<sub>2</sub>Cl<sub>4</sub>, 120 °C)



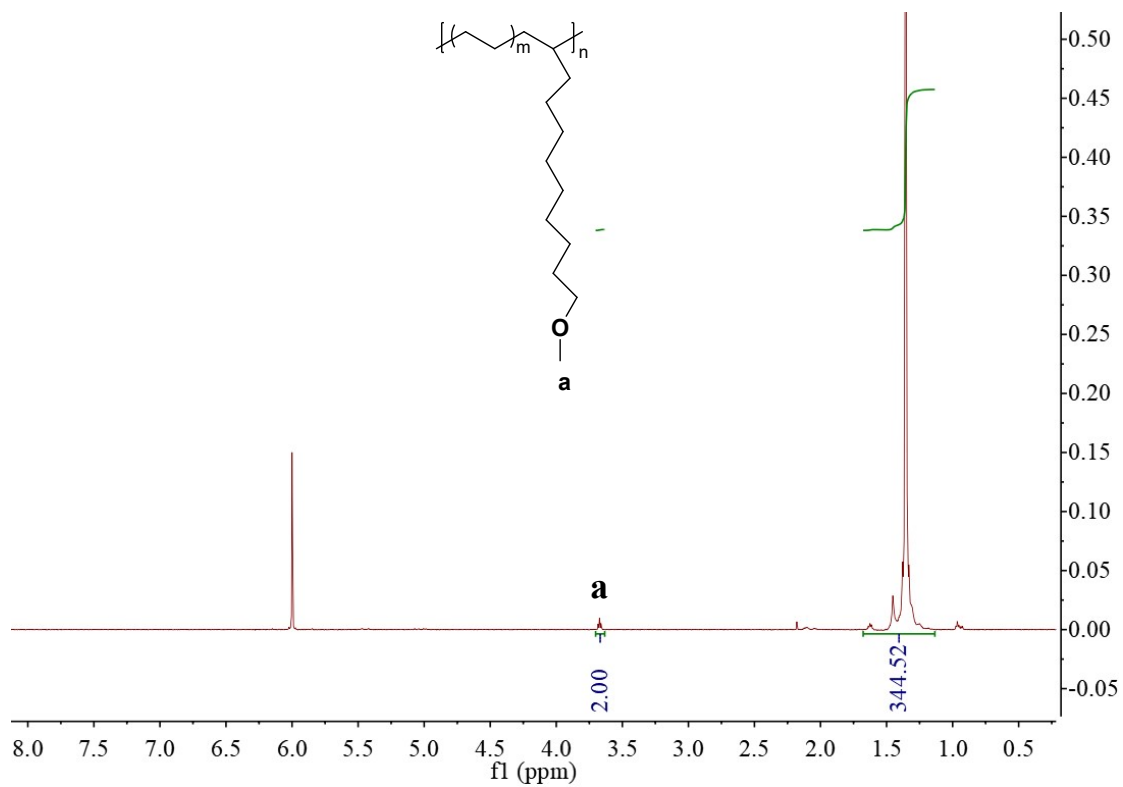

**Figure S37**  $^1\text{H}$  NMR of the polymer from Table 3, Entry 9. ( $\text{C}_2\text{D}_2\text{Cl}_4$ , 120 °C)

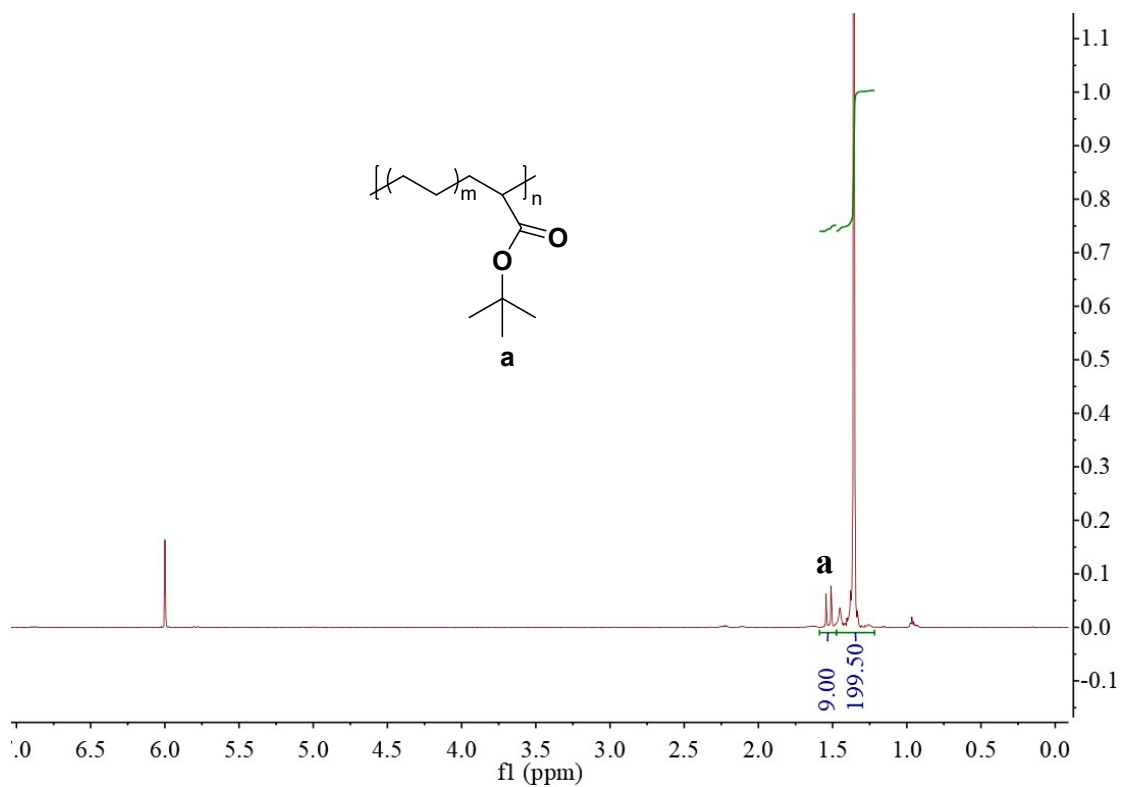

**Figure S38**  $^1\text{H}$  NMR of the polymer from Table 3, Entry 10. ( $\text{C}_2\text{D}_2\text{Cl}_4$ , 120 °C)

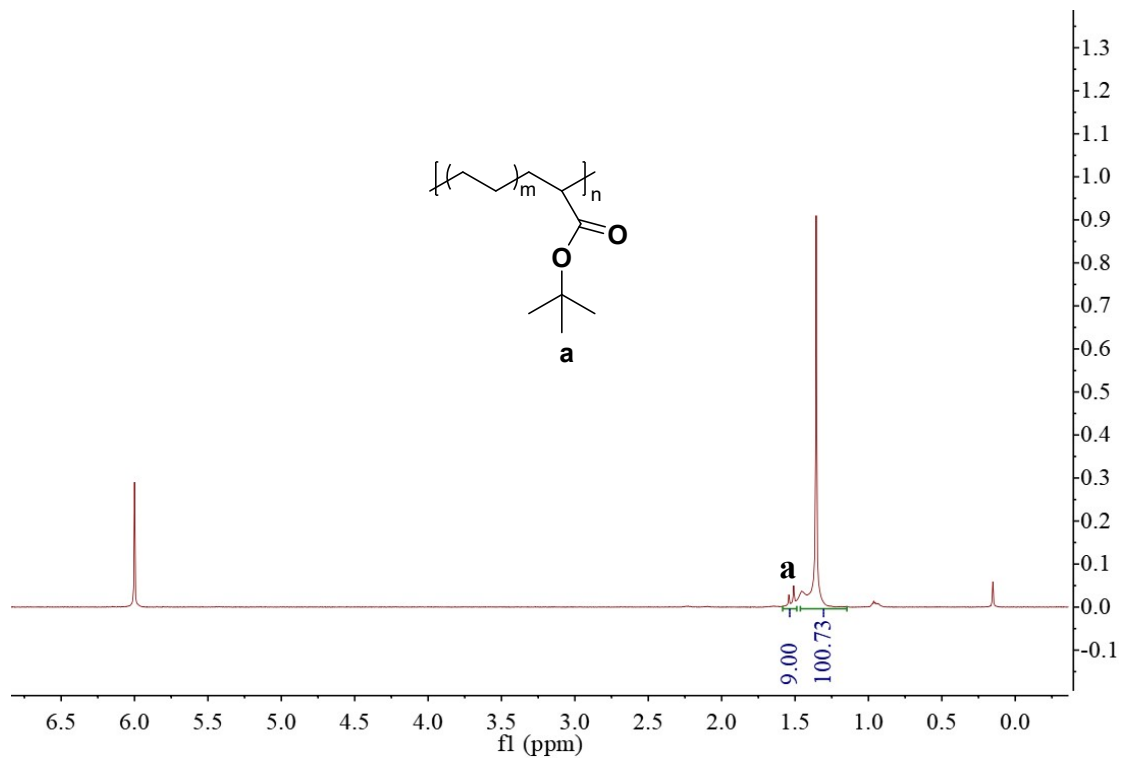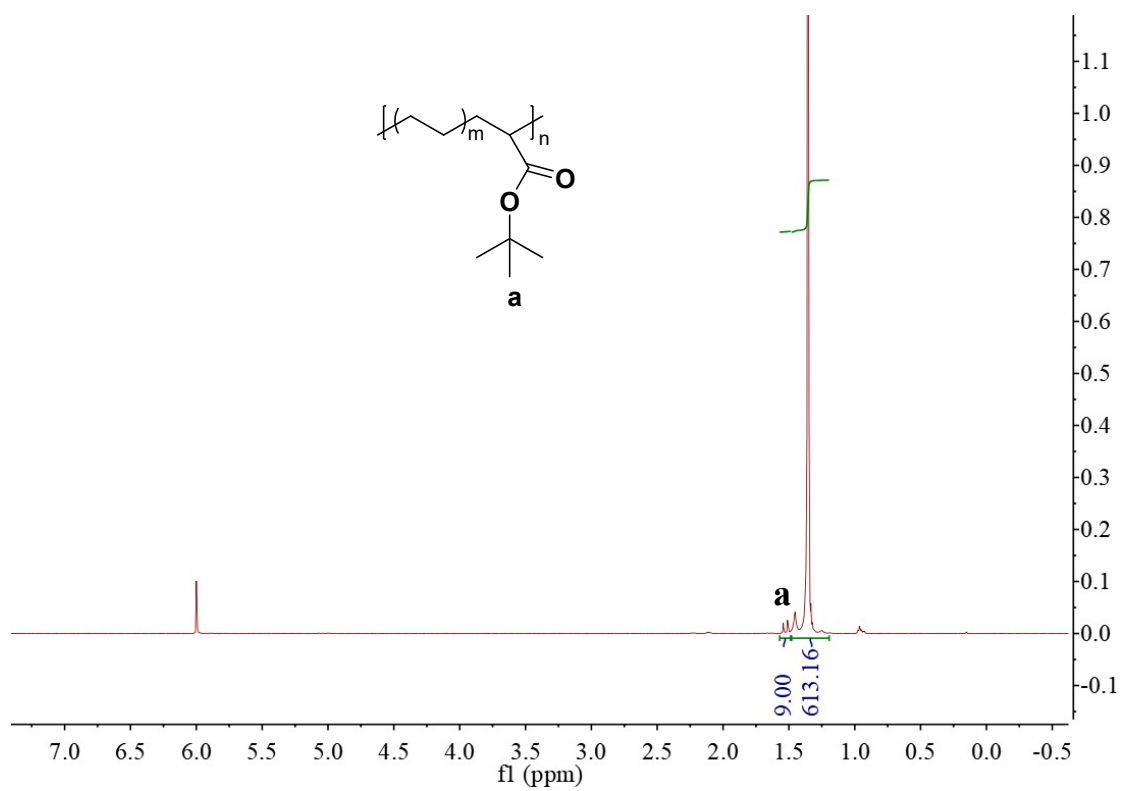

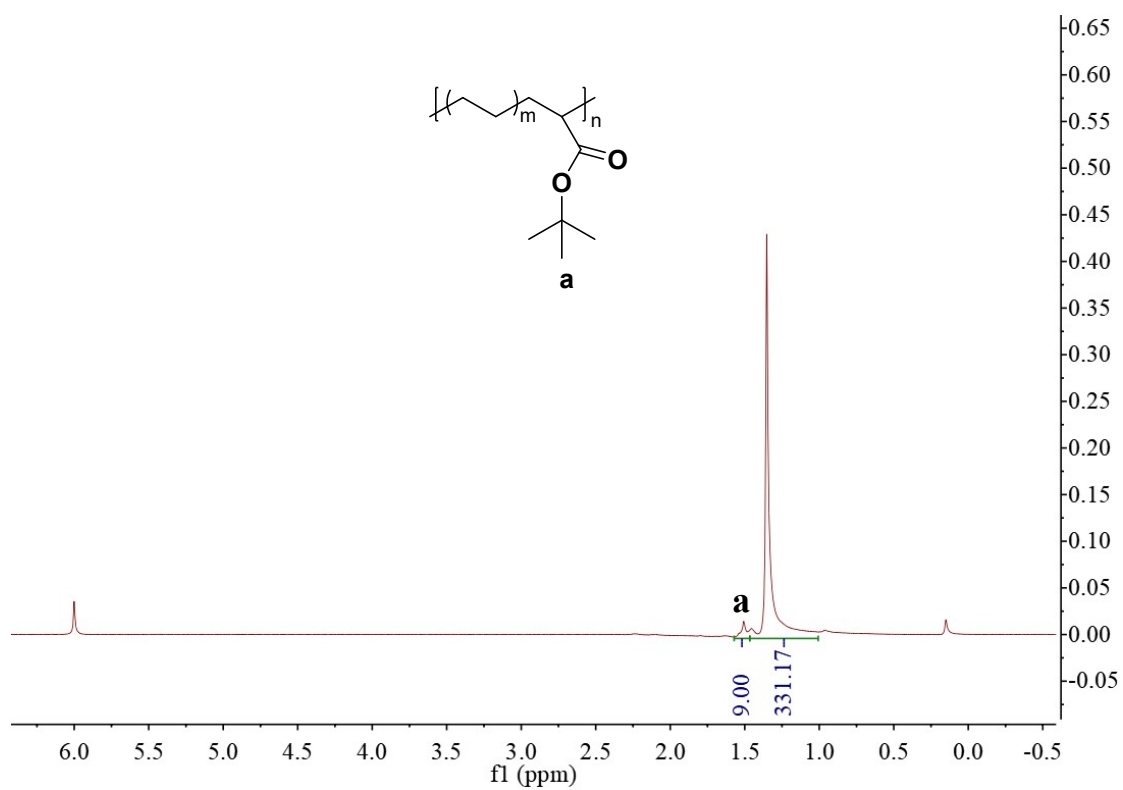

**Figure S41**  $^1\text{H}$  NMR of the polymer from Table 3, Entry 13. ( $\text{C}_2\text{D}_2\text{Cl}_4$ ,  $120\text{ }^\circ\text{C}$ )

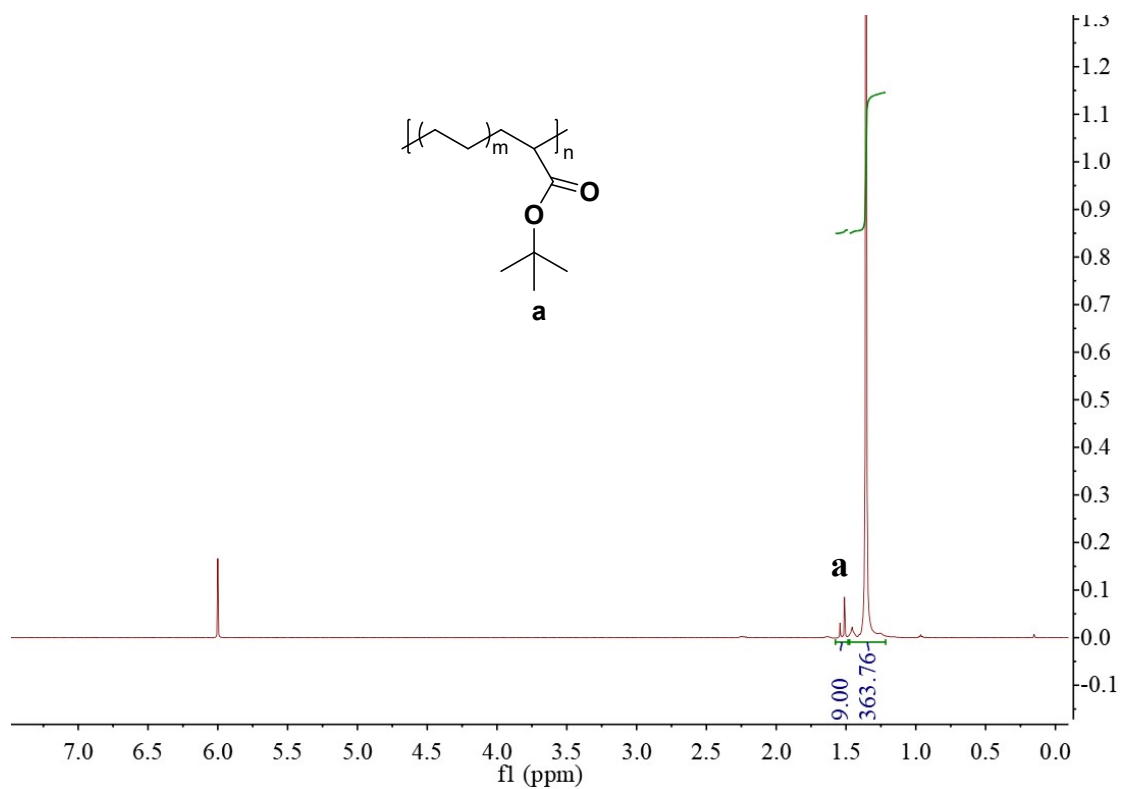

**Figure S42**  $^1\text{H}$  NMR of the polymer from Table 3, Entry 14. ( $\text{C}_2\text{D}_2\text{Cl}_4$ ,  $120\text{ }^\circ\text{C}$ )

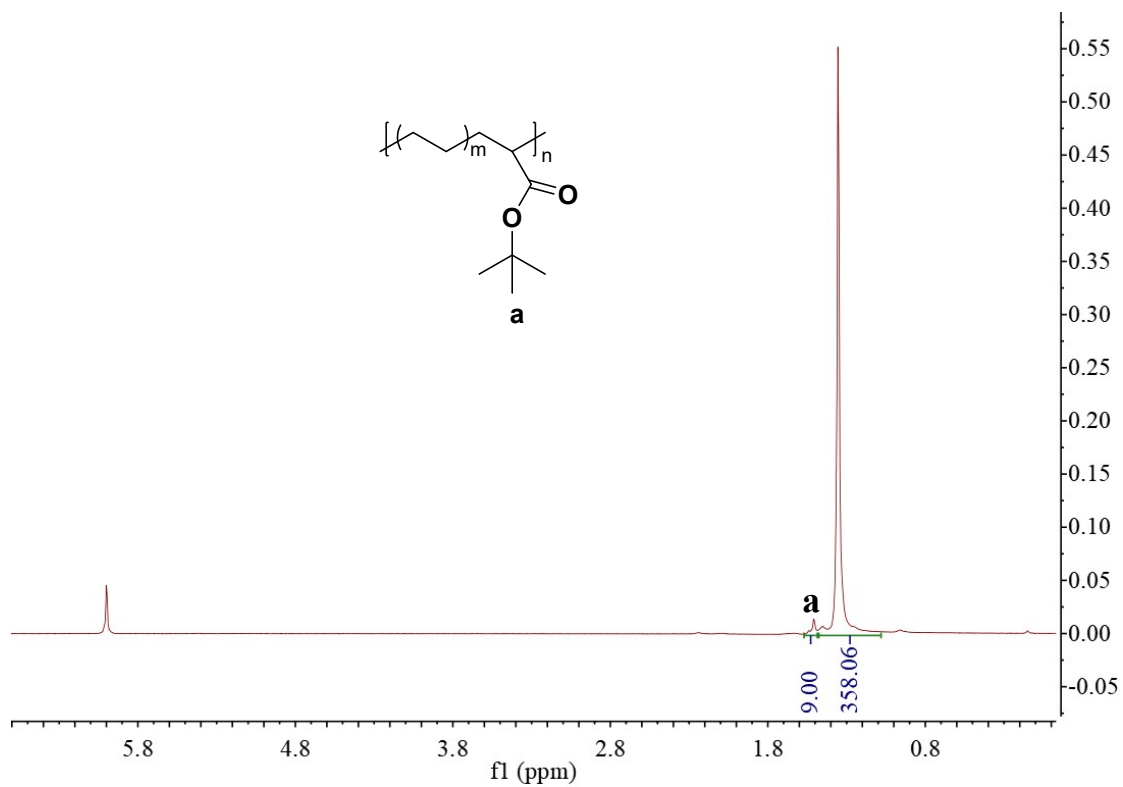

**Figure S43**  $^1\text{H NMR}$  of the polymer from Table 3, Entry 15. ( $\text{C}_2\text{D}_2\text{Cl}_4$ ,  $120\text{ }^\circ\text{C}$ )

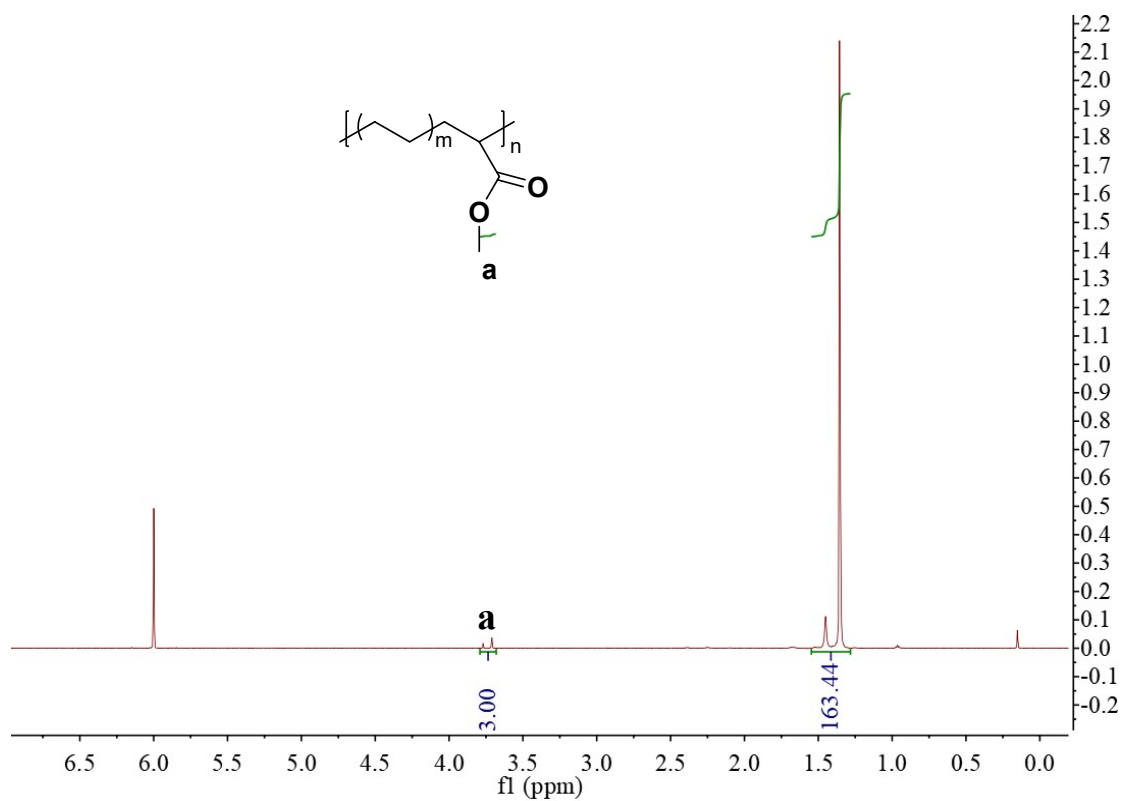

**Figure S44**  $^1\text{H NMR}$  of the polymer from Table 3, Entry 16. ( $\text{C}_2\text{D}_2\text{Cl}_4$ ,  $120\text{ }^\circ\text{C}$ )

## 5. DSC of polymers

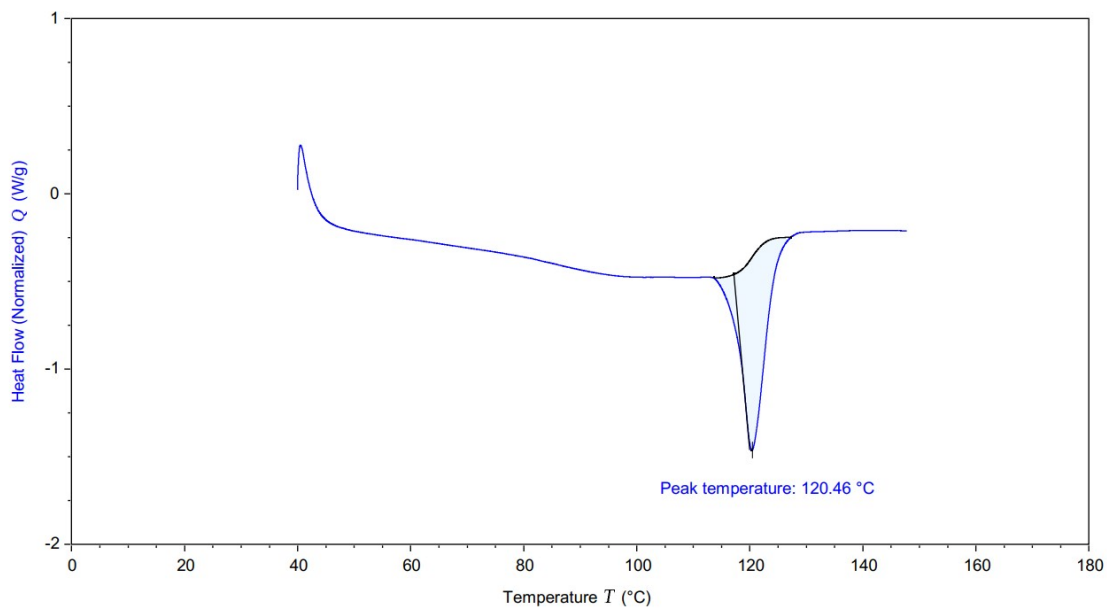

**Figure S45** DSC of the polymer from Table 1, Entry 1.

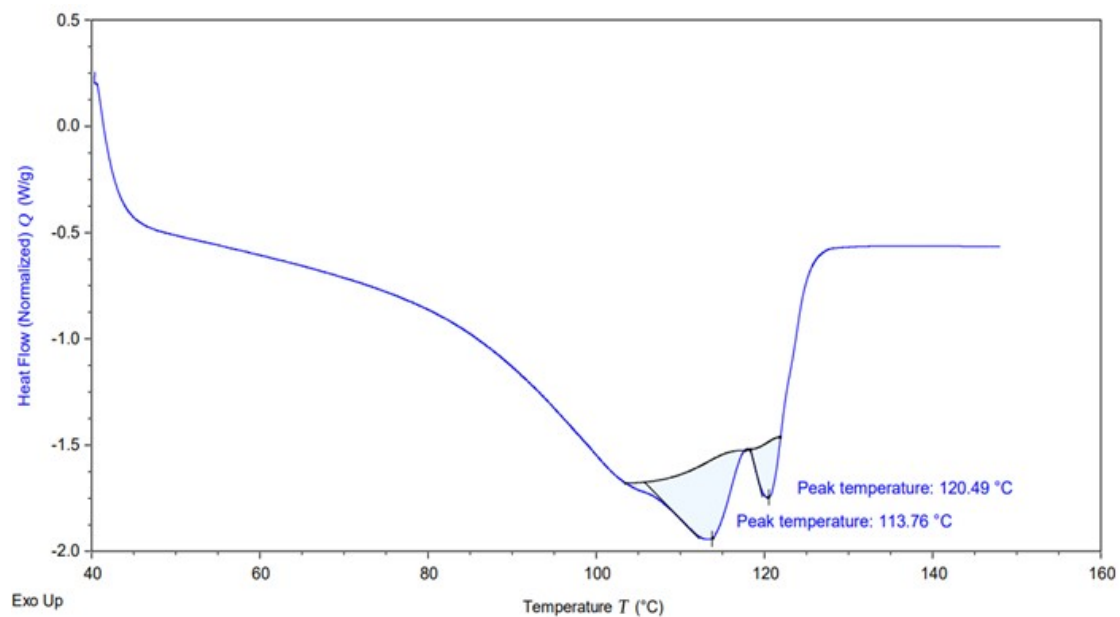

**Figure S46** DSC of the polymer from Table 1, Entry 2.

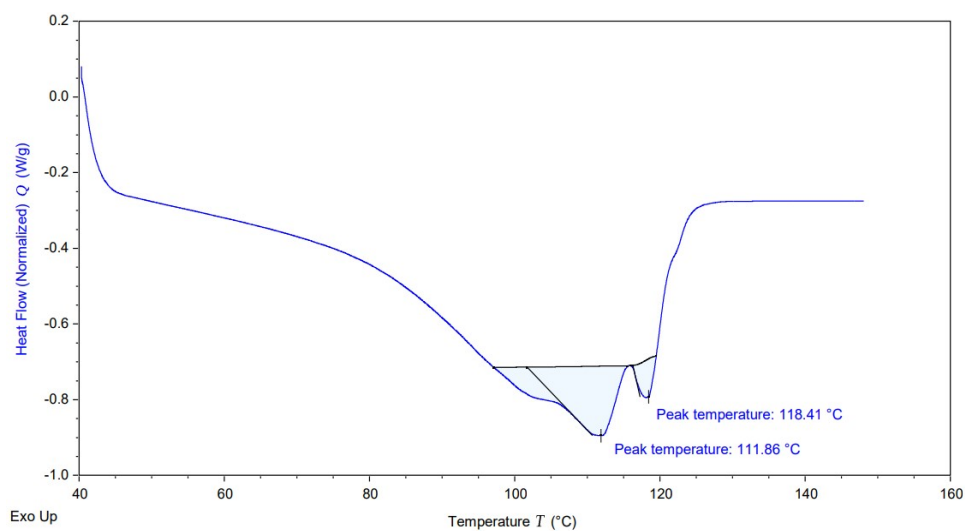

**Figure S47** DSC of the polymer from Table 1, Entry 3.

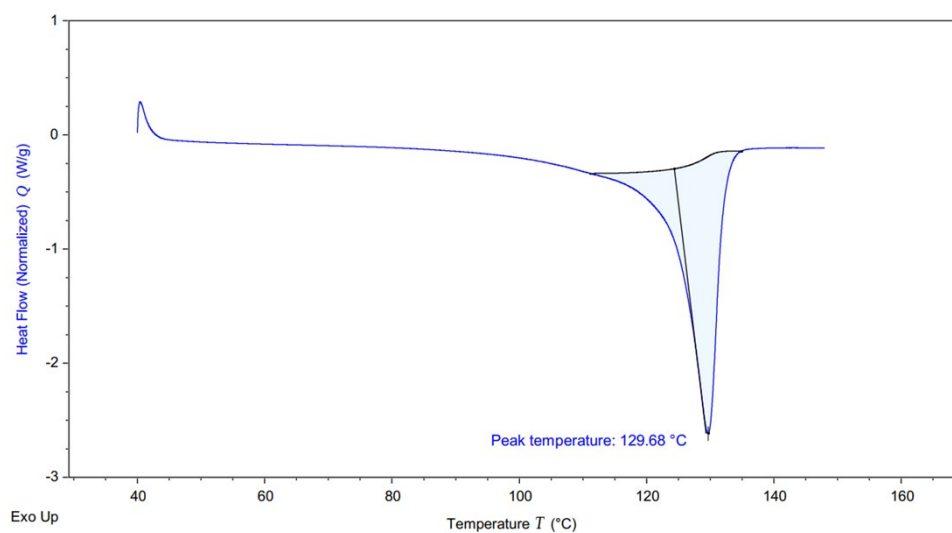

**Figure S48** DSC of the polymer from Table 1, Entry 4.

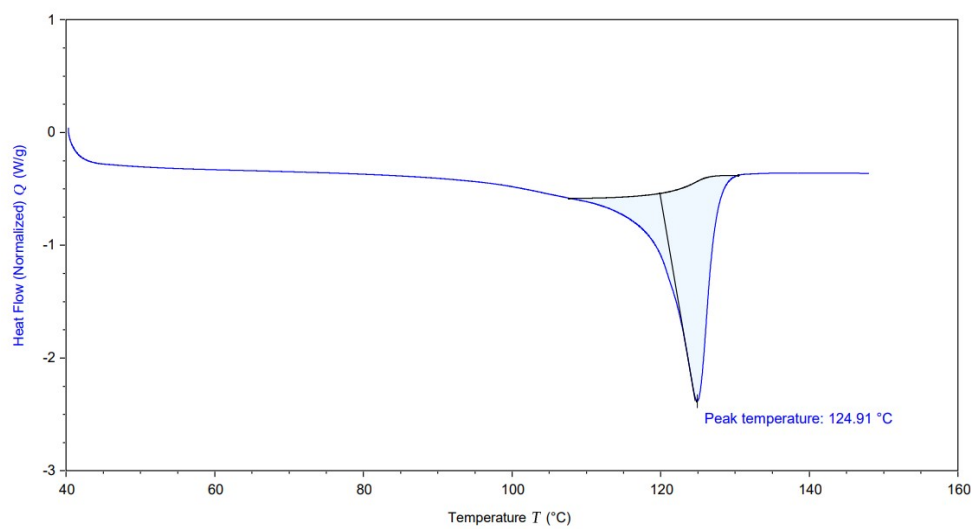

**Figure S49** DSC of the polymer from Table 1, Entry 5.

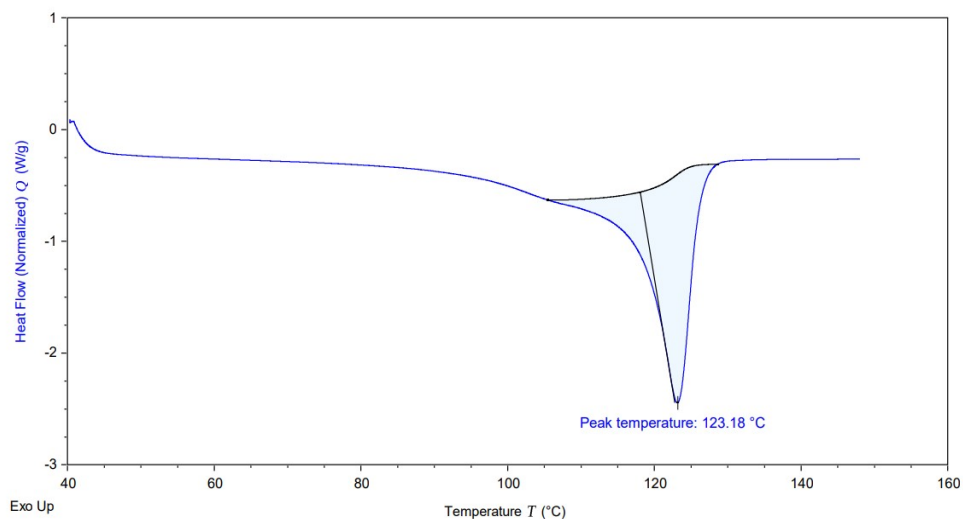

**Figure S50** DSC of the polymer from Table 1, Entry 6.

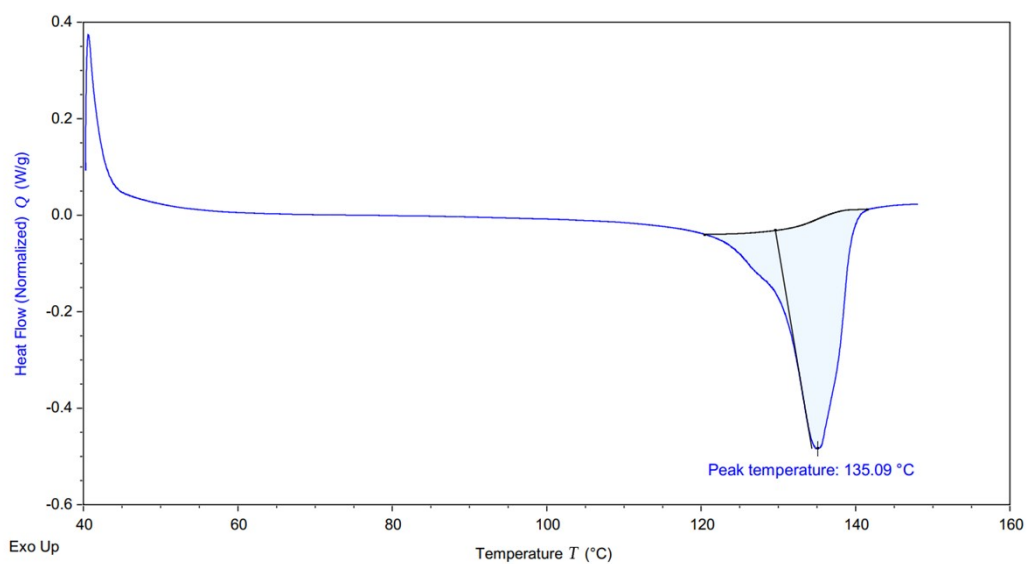

**Figure S51** DSC of the polymer from Table 1, Entry 7.

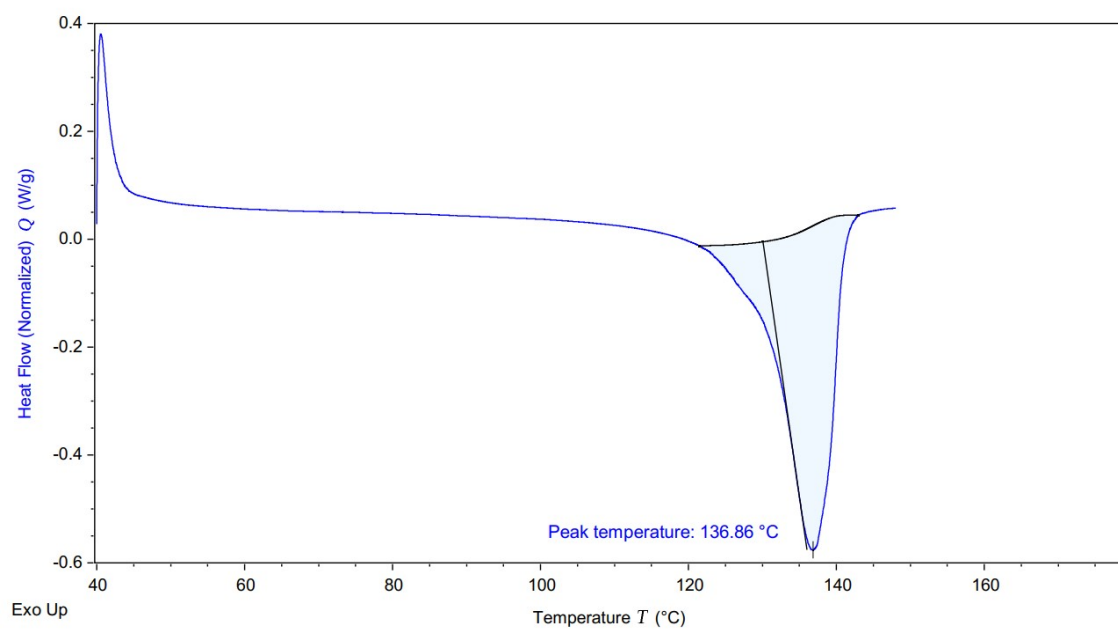

**Figure S52** DSC of the polymer from Table 1, Entry 8.

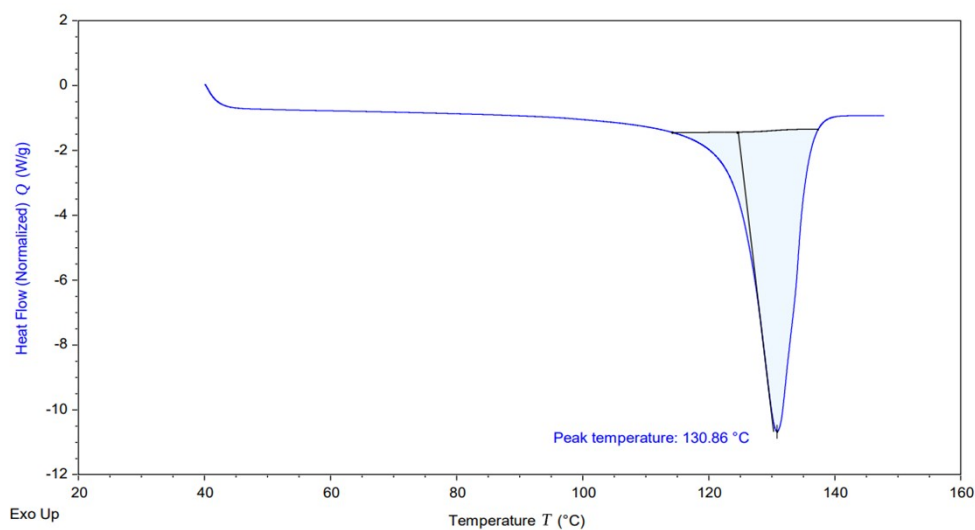

**Figure S53** DSC of the polymer from Table 1, Entry 9.

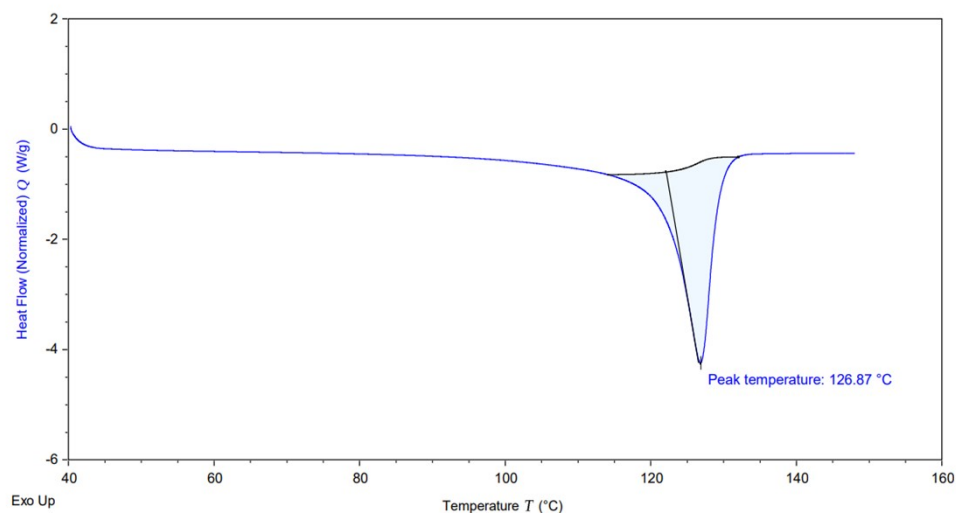

**Figure S54** DSC of the polymer from Table 1, Entry 10.

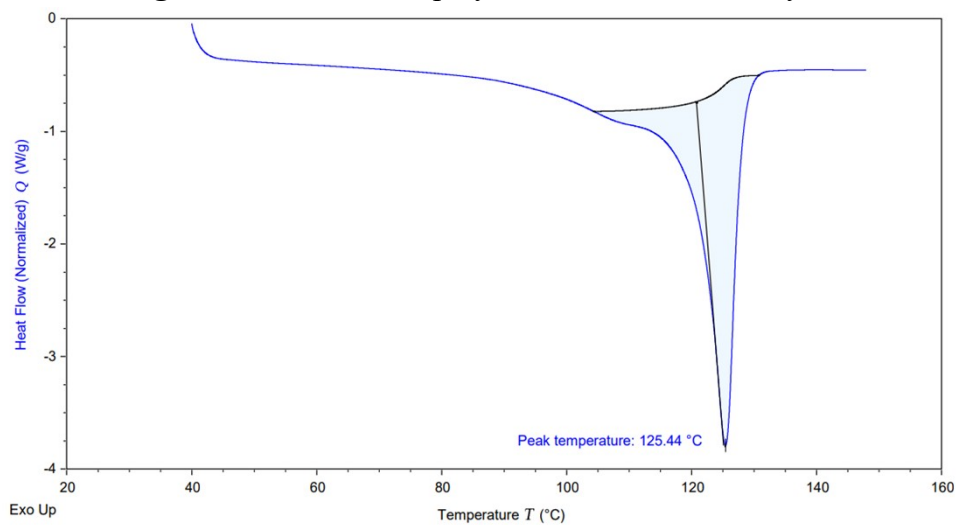

**Figure S55** DSC of the polymer from Table 1, Entry 11.



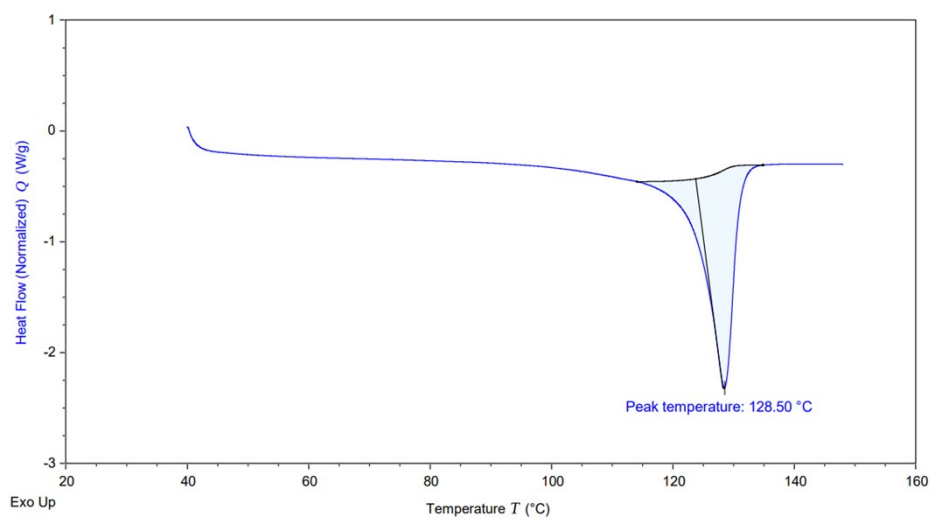

**Figure S56** DSC of the polymer from Table 1, Entry 12.

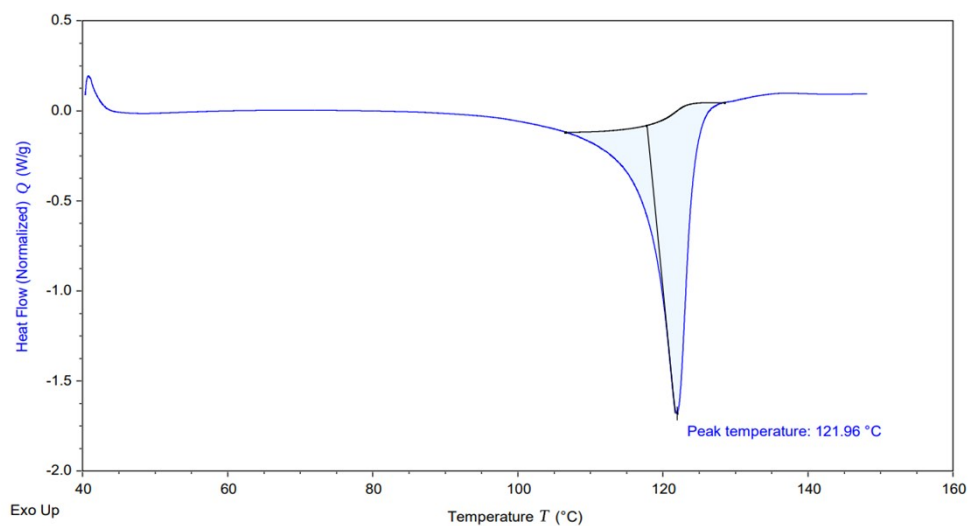

**Figure S57** DSC of the polymer from Table 2, Entry 2.

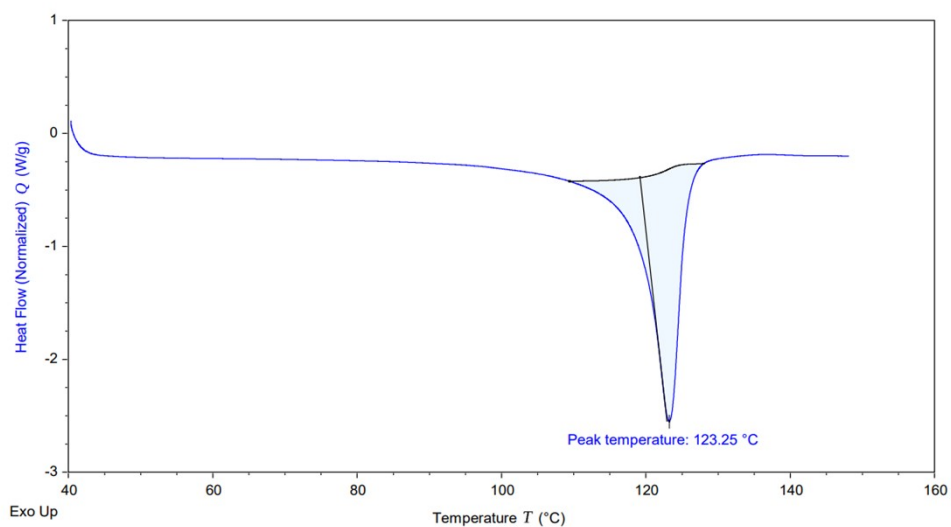

**Figure S58** DSC of the polymer from Table 2, Entry 3.

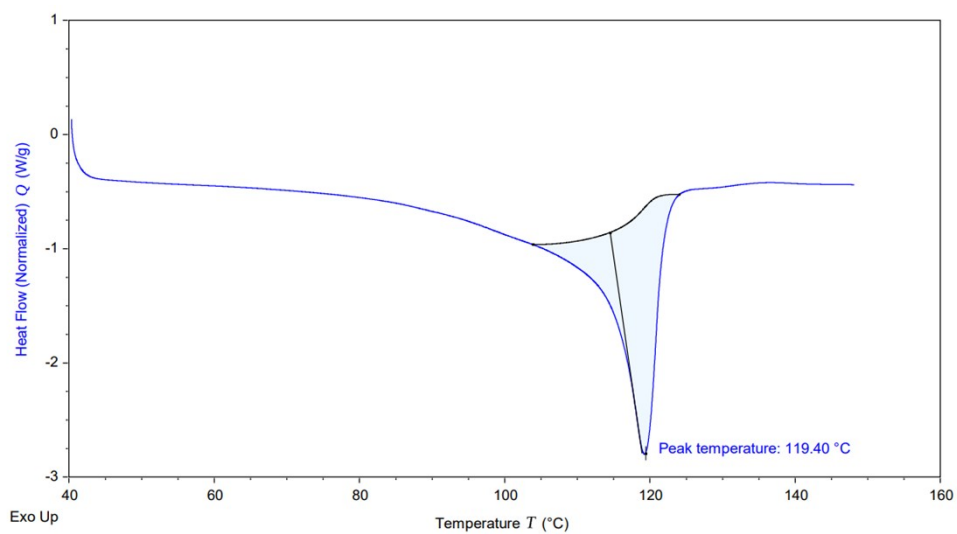

**Figure S59** DSC of the polymer from Table 2, Entry 4.

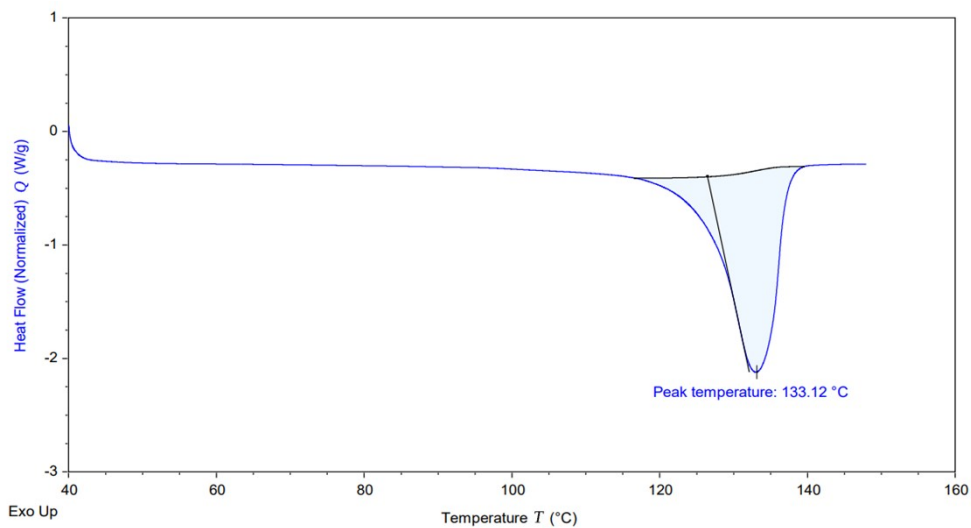

**Figure S60** DSC of the polymer from Table 2, Entry 6.

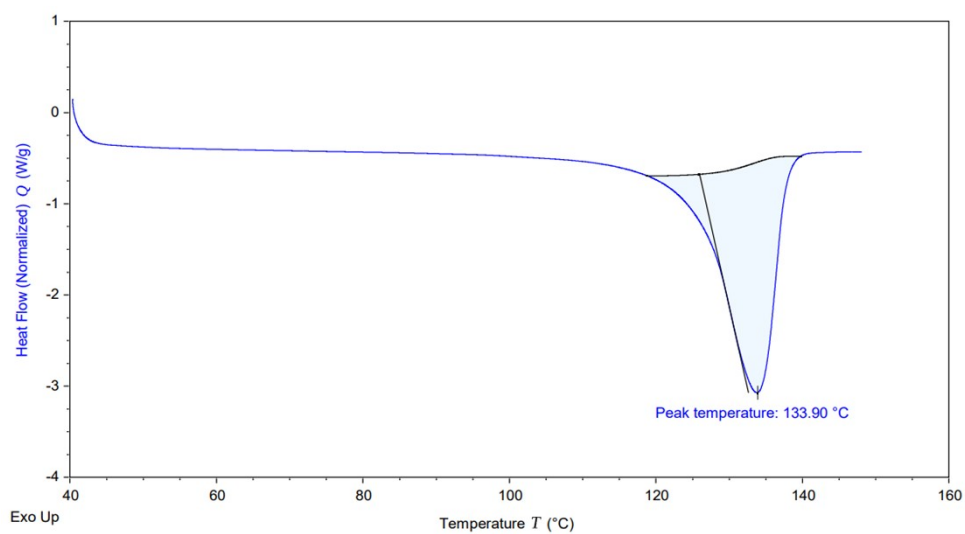

**Figure S61** DSC of the polymer from Table 2, Entry 7.

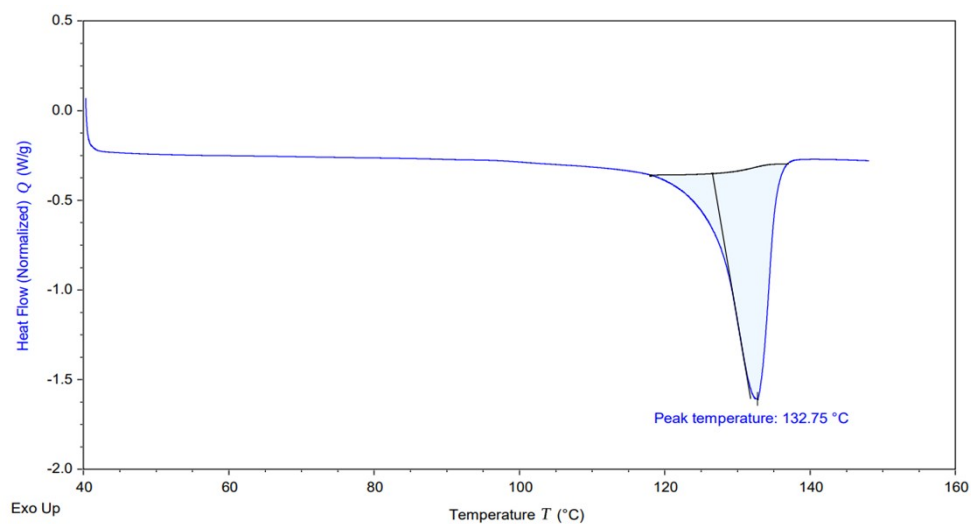

**Figure S62** DSC of the polymer from Table 2, Entry 8.

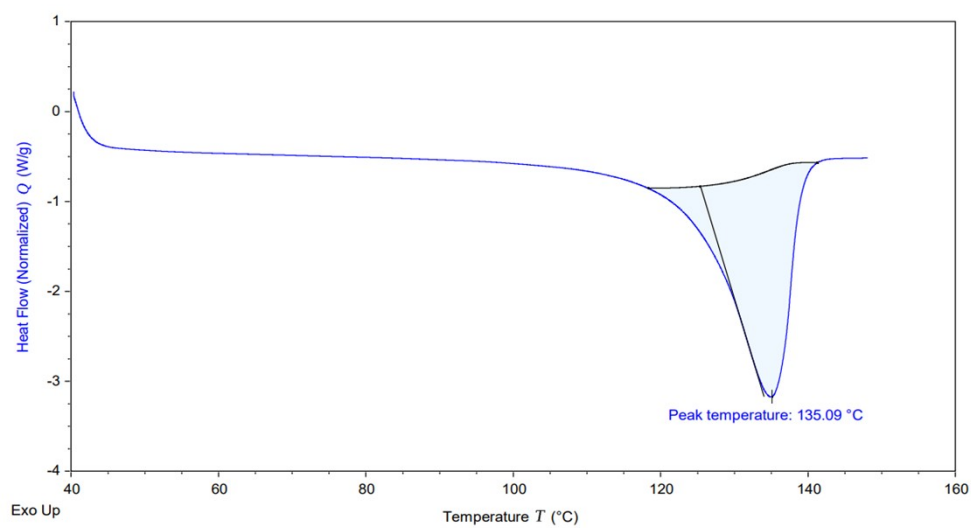

**Figure S63** DSC of the polymer from Table 2, Entry 10.

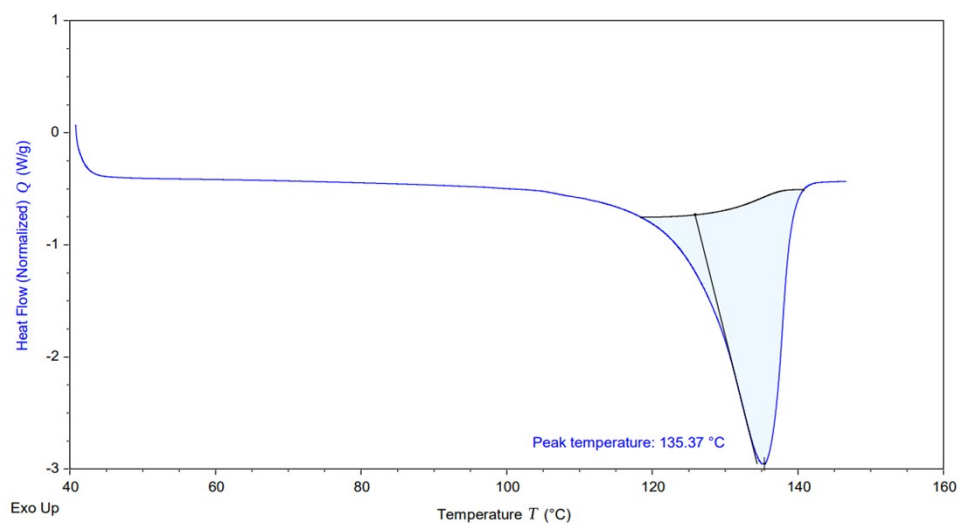

**Figure S64** DSC of the polymer from Table 2, Entry 11.

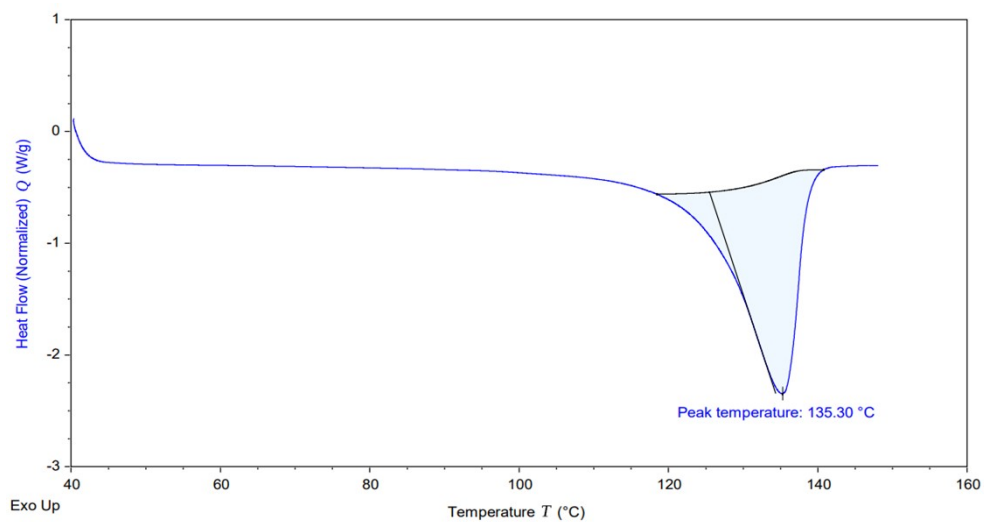

**Figure S65** DSC of the polymer from Table 2, Entry 12.

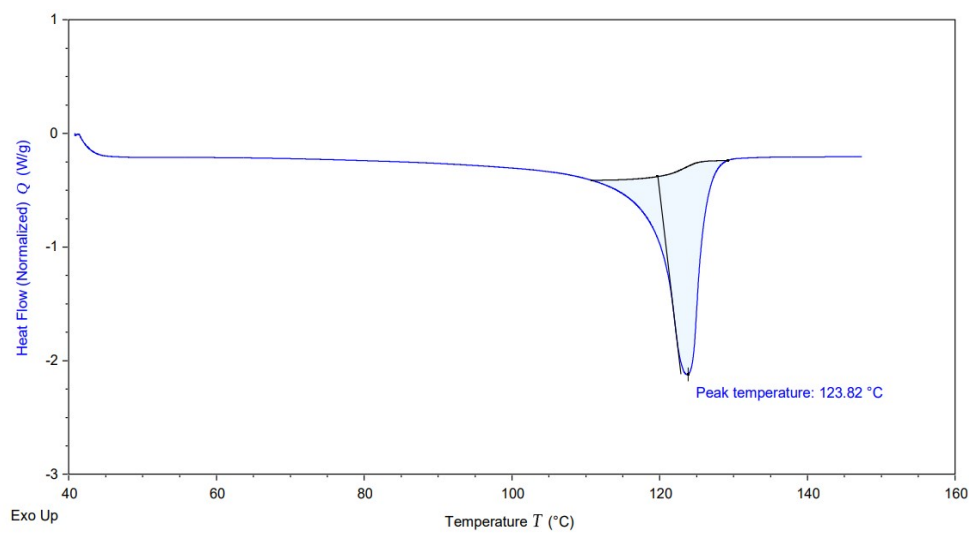

**Figure S66** DSC of the polymer from Table 3, Entry 1.

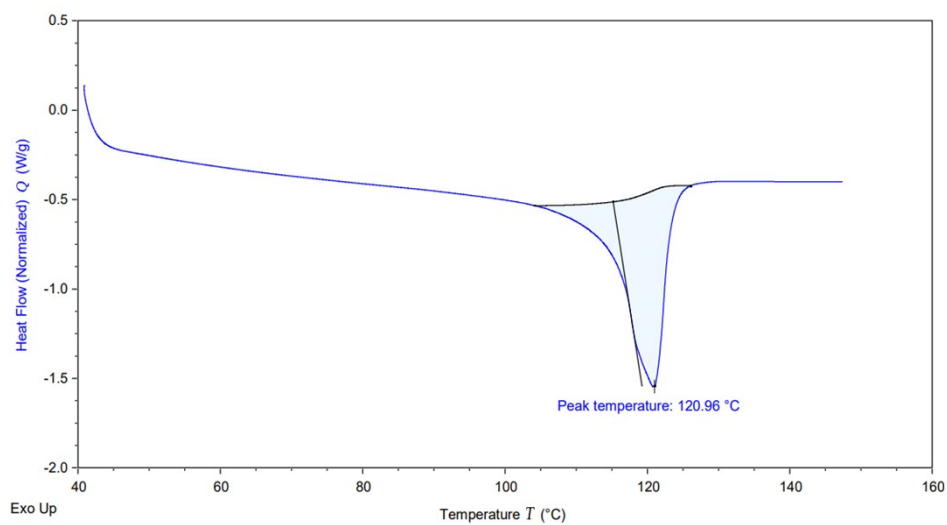

**Figure S67** DSC of the polymer from Table 3, Entry 2.

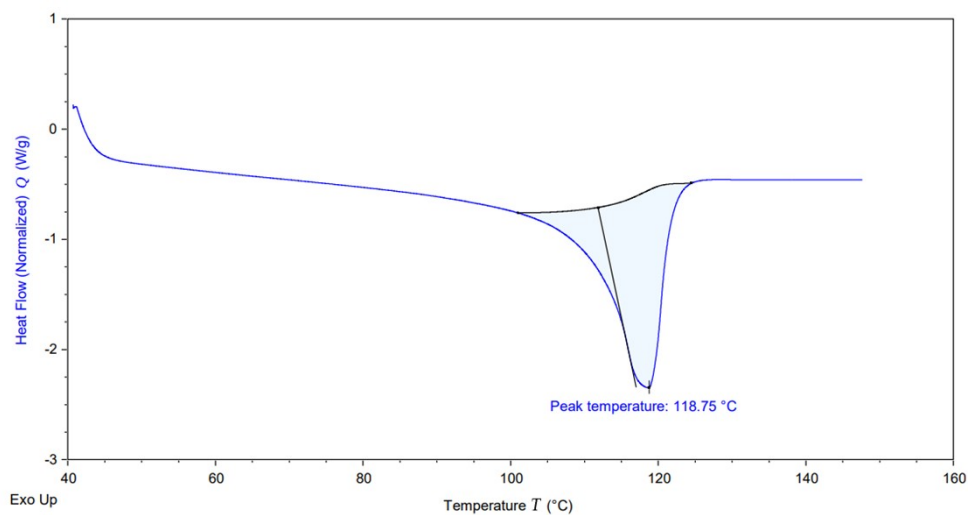

**Figure S68** DSC of the polymer from Table 3, Entry 3.

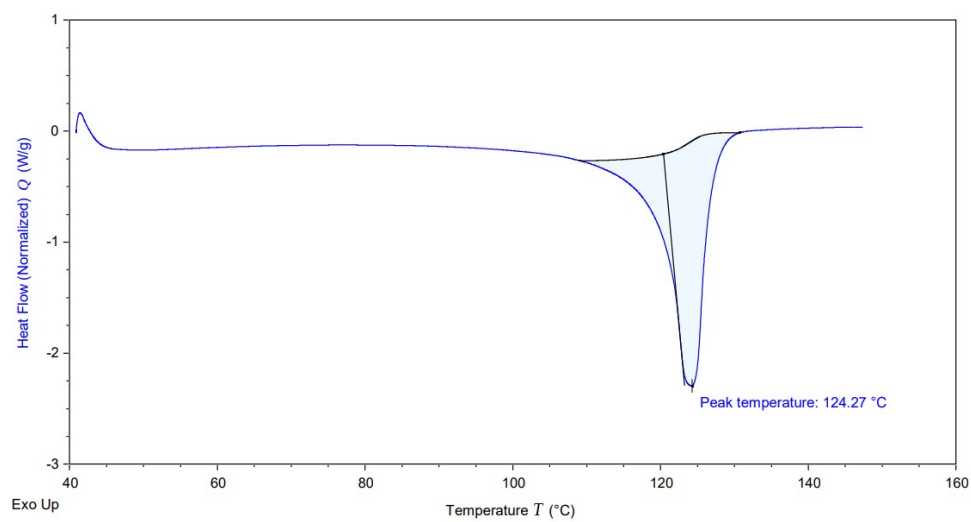

**Figure S69** DSC of the polymer from Table 3, Entry 4.

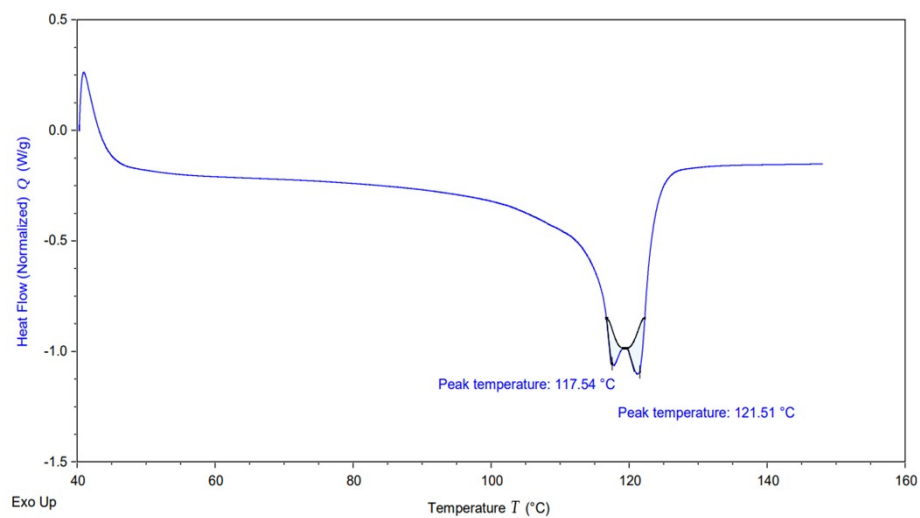

**Figure S70** DSC of the polymer from Table 3, Entry 5.

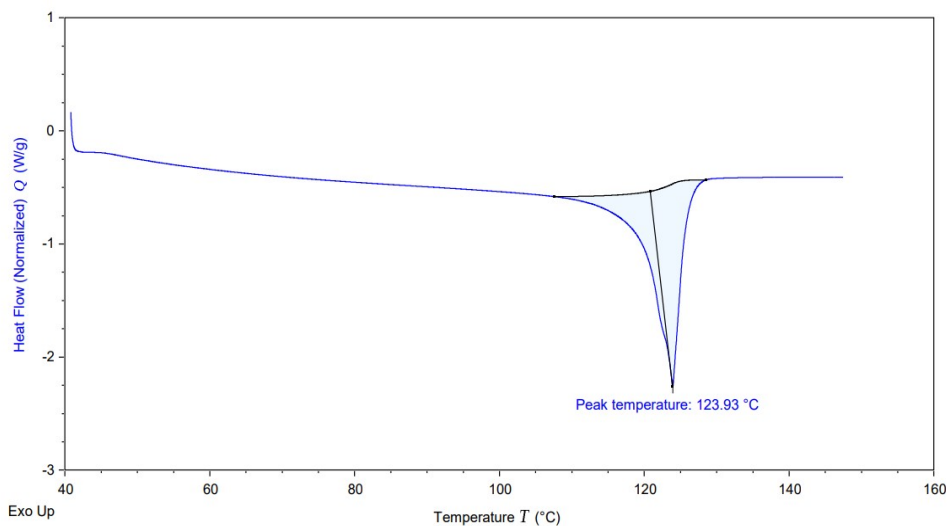

**Figure S71** DSC of the polymer from Table 3, Entry 6.

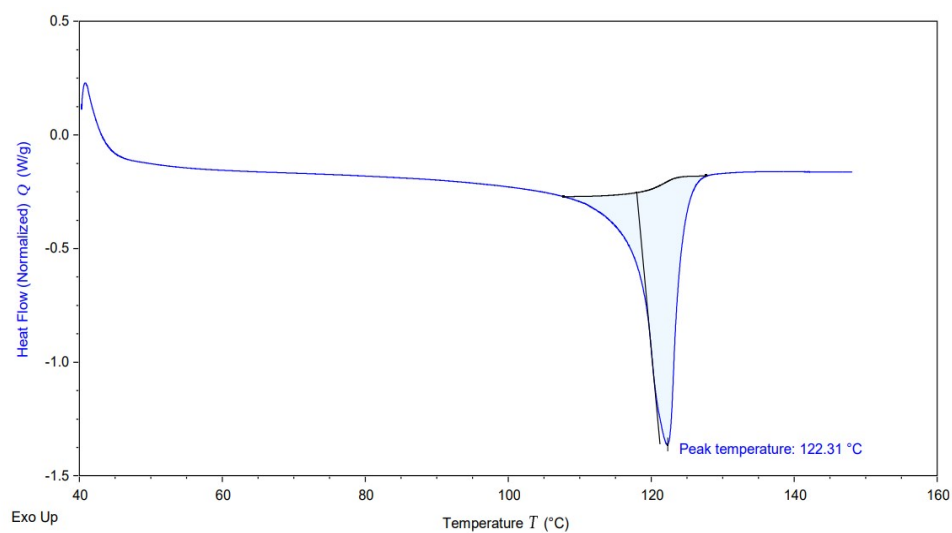

**Figure S72** DSC of the polymer from Table 3, Entry 7.

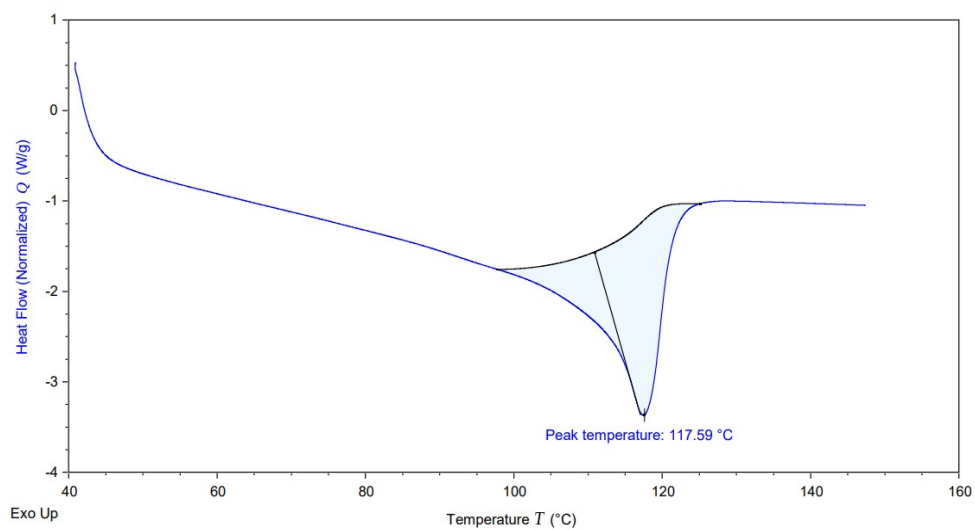

**Figure S73** DSC of the polymer from Table 3, Entry 8.

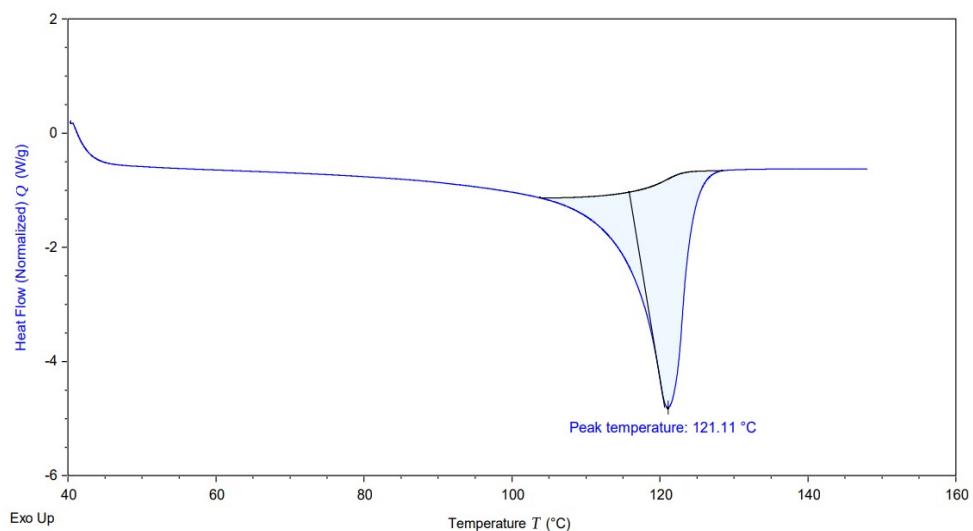

**Figure S74** DSC of the polymer from Table 3, Entry 9.

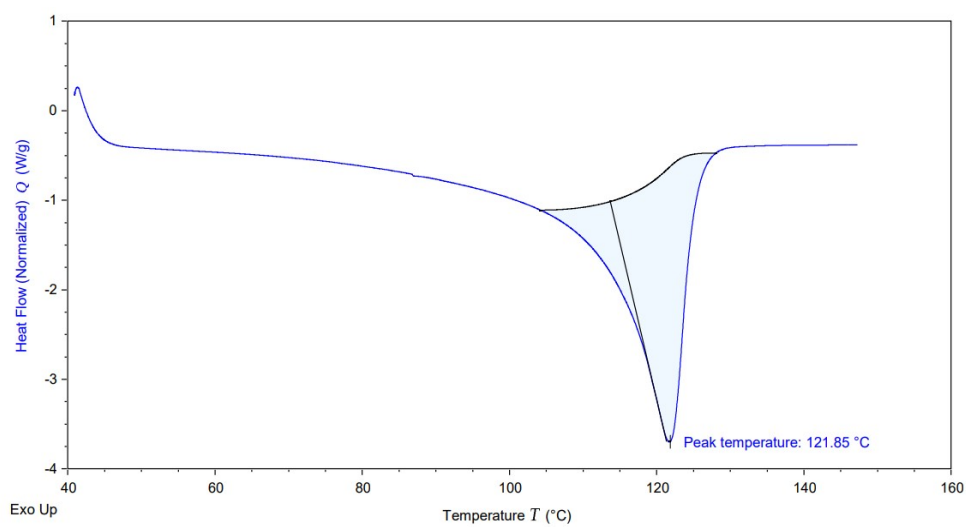

**Figure S75** DSC of the polymer from Table 3, Entry 10.

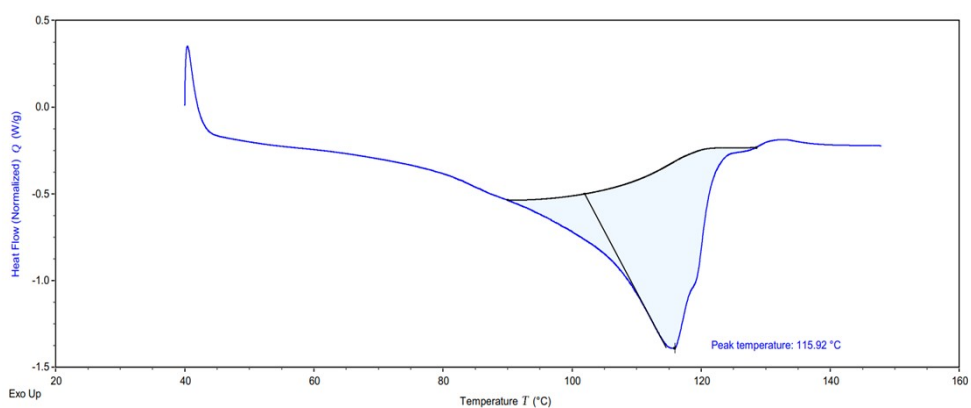

**Figure S76** DSC of the polymer from Table 3, Entry 11.

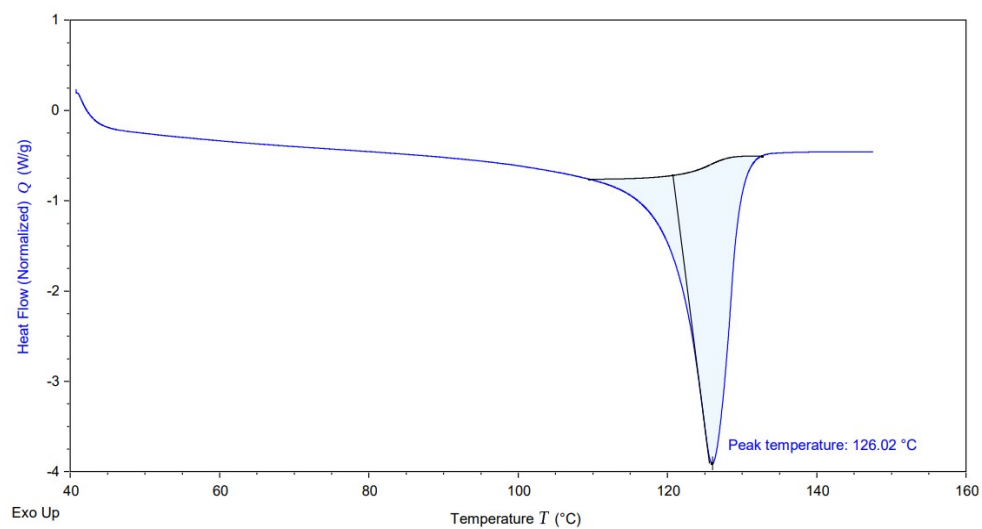

**Figure S77** DSC of the polymer from Table 3, Entry 12.

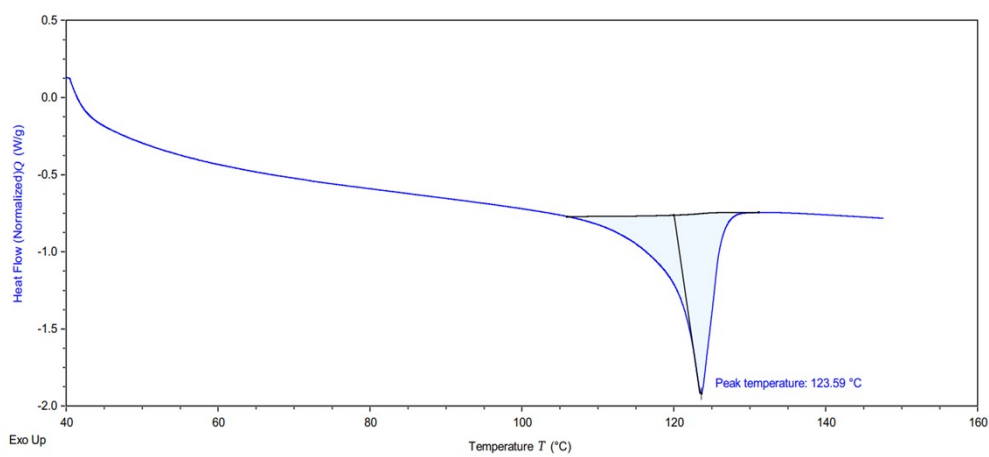

**Figure S78** DSC of the polymer from Table 3, Entry 13.

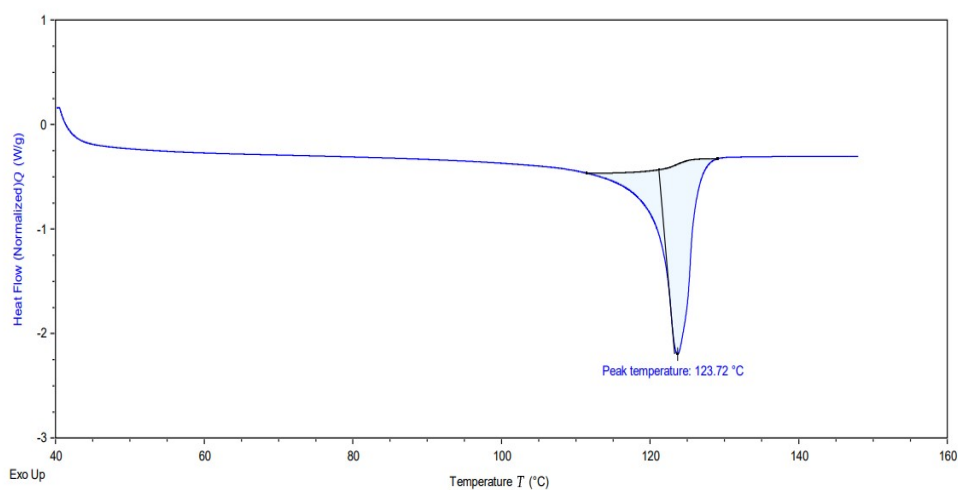

**Figure S79** DSC of the polymer from Table 3, Entry 14.



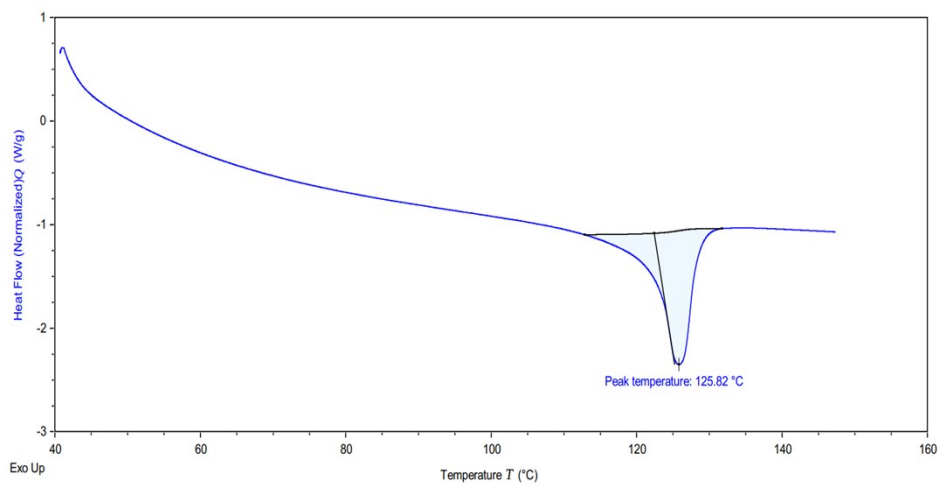

**Figure S80** DSC of the polymer from Table 3, Entry 15.

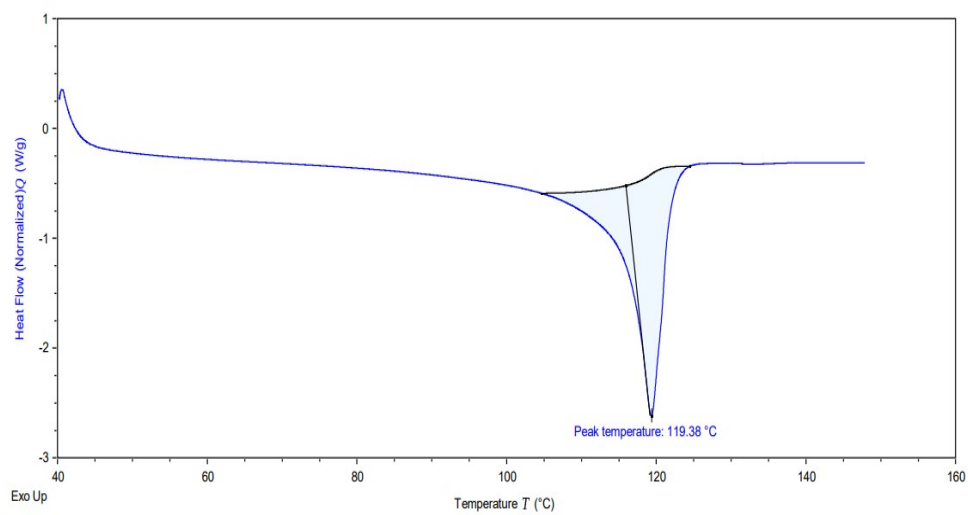

**Figure S81** DSC of the polymer from Table 3, Entry 16.

## 6. GPC of polymers

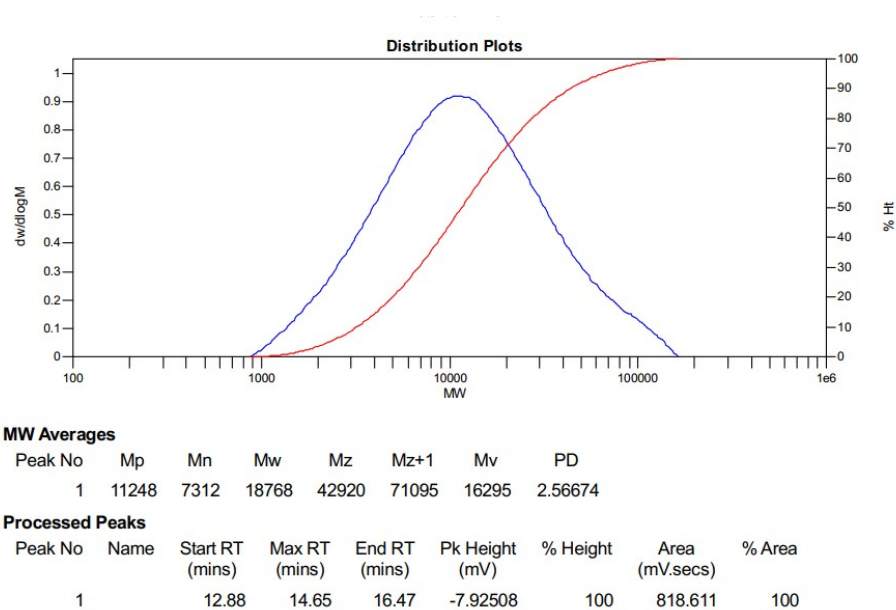

**Figure S82** GPC of the polymer from Table 1, Entry 1.

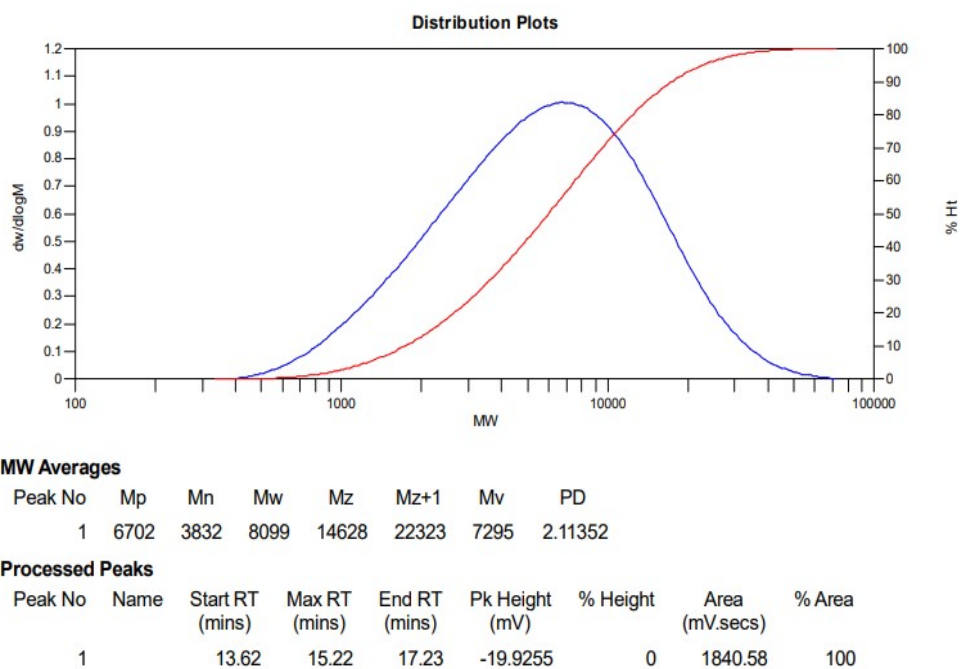

**Figure S83** GPC of the polymer from Table 1, Entry 2.

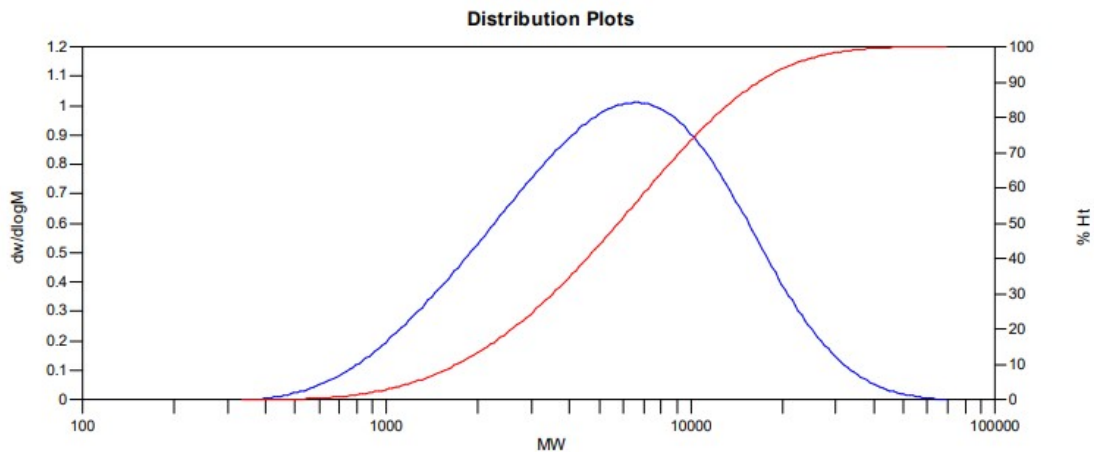

**MW Averages**

| Peak No | Mp   | Mn   | Mw   | Mz    | Mz+1  | Mv   | PD      |
|---------|------|------|------|-------|-------|------|---------|
| 1       | 6538 | 3731 | 7777 | 13882 | 20941 | 7019 | 2.08443 |

**Processed Peaks**

| Peak No | Name | Start RT (mins) | Max RT (mins) | End RT (mins) | Pk Height (mV) | % Height | Area (mV.secs) | % Area |
|---------|------|-----------------|---------------|---------------|----------------|----------|----------------|--------|
| 1       |      | 13.65           | 15.23         | 17.23         | -26.1884       | 0        | 2405.66        | 100    |

**Figure S84** GPC of the polymer from Table 1, Entry 3.

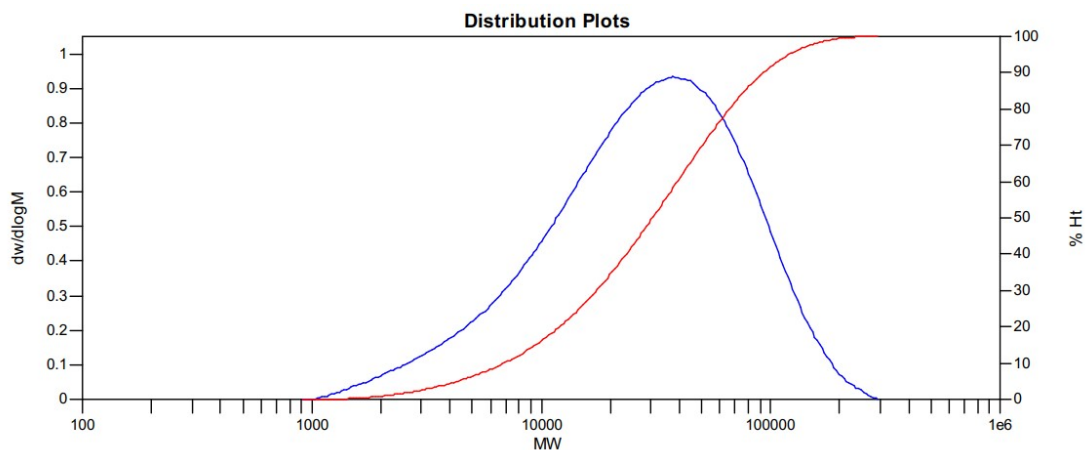

**MW Averages**

| Peak No | Mp    | Mn    | Mw    | Mz    | Mz+1   | Mv    | PD      |
|---------|-------|-------|-------|-------|--------|-------|---------|
| 1       | 37621 | 15567 | 41563 | 75953 | 109769 | 37018 | 2.66994 |

**Processed Peaks**

| Peak No | Name | Start RT (mins) | Max RT (mins) | End RT (mins) | Pk Height (mV) | % Height | Area (mV.secs) | % Area |
|---------|------|-----------------|---------------|---------------|----------------|----------|----------------|--------|
| 1       |      | 12.88           | 14.28         | 16.82         | -10.4162       | 0        | 1049.57        | 100    |

**Figure S85** GPC of the polymer from Table 1, Entry 4.

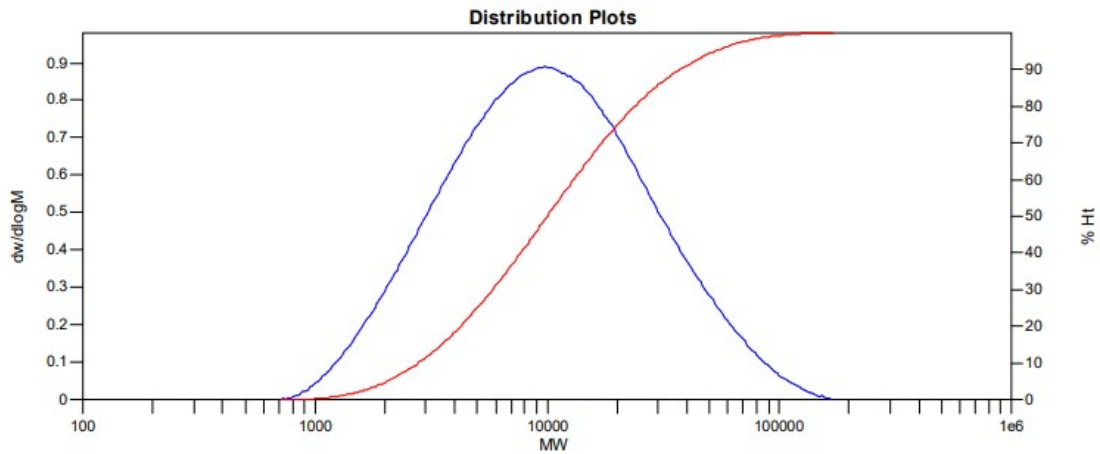

**MW Averages**

| Peak No | Mp   | Mn   | Mw    | Mz    | Mz+1  | Mv    | PD      |
|---------|------|------|-------|-------|-------|-------|---------|
| 1       | 9785 | 6371 | 15992 | 35746 | 60023 | 13879 | 2.51012 |

**Processed Peaks**

| Peak No | Name | Start RT (mins) | Max RT (mins) | End RT (mins) | Pk Height (mV) | % Height | Area (mV.secs) | % Area |
|---------|------|-----------------|---------------|---------------|----------------|----------|----------------|--------|
| 1       |      | 13.25           | 15.20         | 16.98         | -11.0357       | 0        | 1166.28        | 100    |

**Figure S86** GPC of the polymer from Table 1, Entry 5.

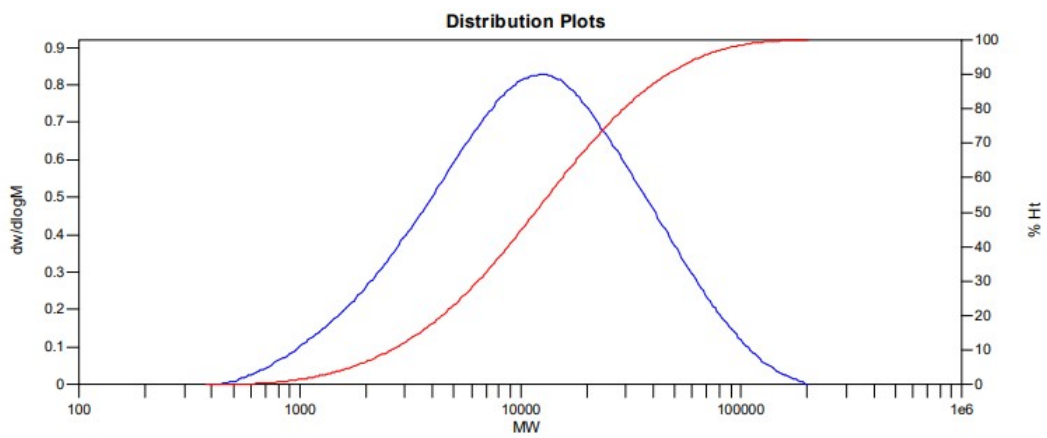

**MW Averages**

| Peak No | Mp    | Mn   | Mw    | Mz    | Mz+1  | Mv    | PD      |
|---------|-------|------|-------|-------|-------|-------|---------|
| 1       | 12772 | 6128 | 19249 | 44767 | 73974 | 16452 | 3.14116 |

**Processed Peaks**

| Peak No | Name | Start RT (mins) | Max RT (mins) | End RT (mins) | Pk Height (mV) | % Height | Area (mV.secs) | % Area |
|---------|------|-----------------|---------------|---------------|----------------|----------|----------------|--------|
| 1       |      | 12.93           | 14.78         | 17.15         | -9.78375       | 0        | 1095.16        | 100    |

**Figure S87** GPC of the polymer from Table 1, Entry 6.

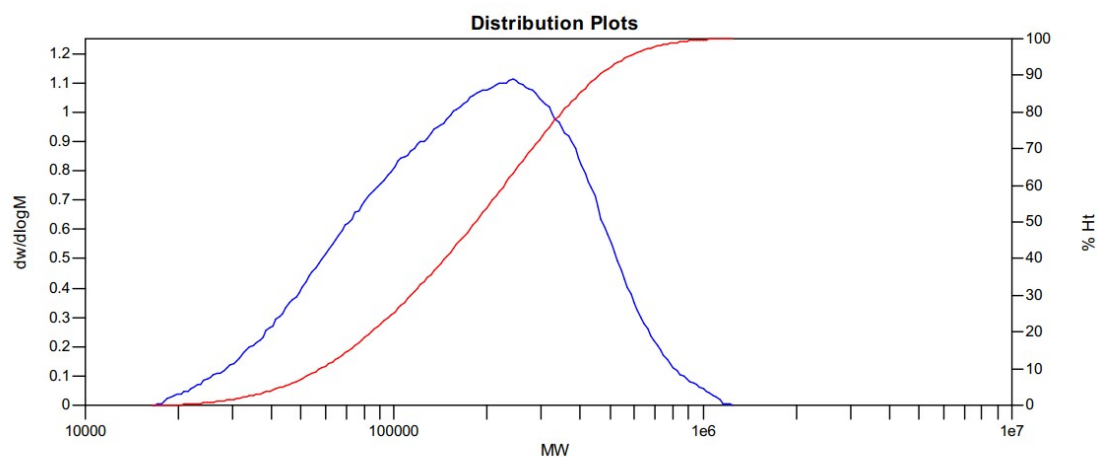

**MW Averages**

| Peak No | Mp     | Mn     | Mw     | Mz     | Mz+1   | Mv     | PD      |
|---------|--------|--------|--------|--------|--------|--------|---------|
| 1       | 241881 | 123068 | 225996 | 355357 | 483397 | 208199 | 1.83635 |

**Processed Peaks**

| Peak No | Name | Start RT (mins) | Max RT (mins) | End RT (mins) | Pk Height (mV) | % Height | Area (mV.secs) | % Area |
|---------|------|-----------------|---------------|---------------|----------------|----------|----------------|--------|
| 1       |      | 11.90           | 13.02         | 14.85         | -3.92012       | 0        | 331.897        | 100    |

**Figure S88** GPC of the polymer from Table 1, Entry 7.

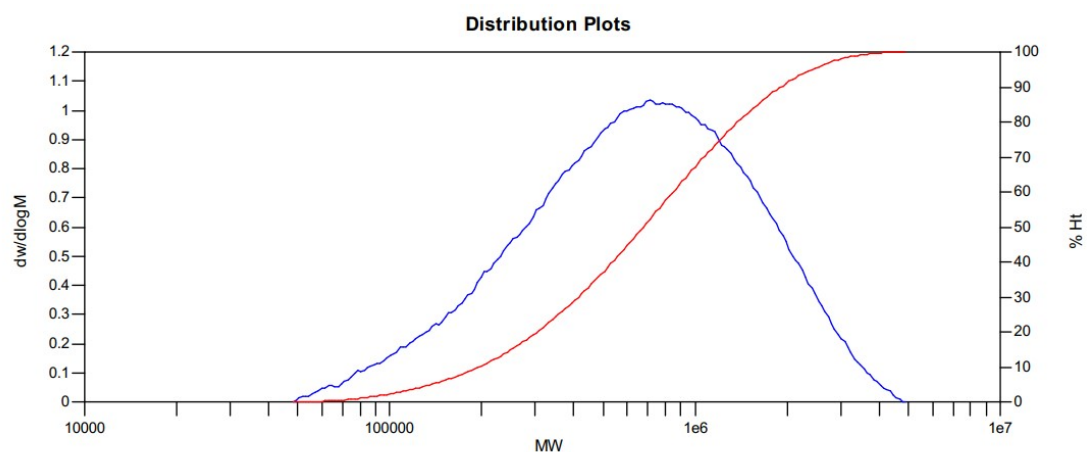

**MW Averages**

| Peak No | Mp     | Mn     | Mw     | Mz      | Mz+1    | Mv     | PD      |
|---------|--------|--------|--------|---------|---------|--------|---------|
| 1       | 710379 | 427578 | 882707 | 1474860 | 2039431 | 802627 | 2.06444 |

**Processed Peaks**

| Peak No | Name | Start RT (mins) | Max RT (mins) | End RT (mins) | Pk Height (mV) | % Height | Area (mV.secs) | % Area |
|---------|------|-----------------|---------------|---------------|----------------|----------|----------------|--------|
| 1       |      | 10.97           | 12.28         | 14.12         | -3.53988       | 0        | 321.729        | 100    |

**Figure S89** GPC of the polymer from Table 1, Entry 8.

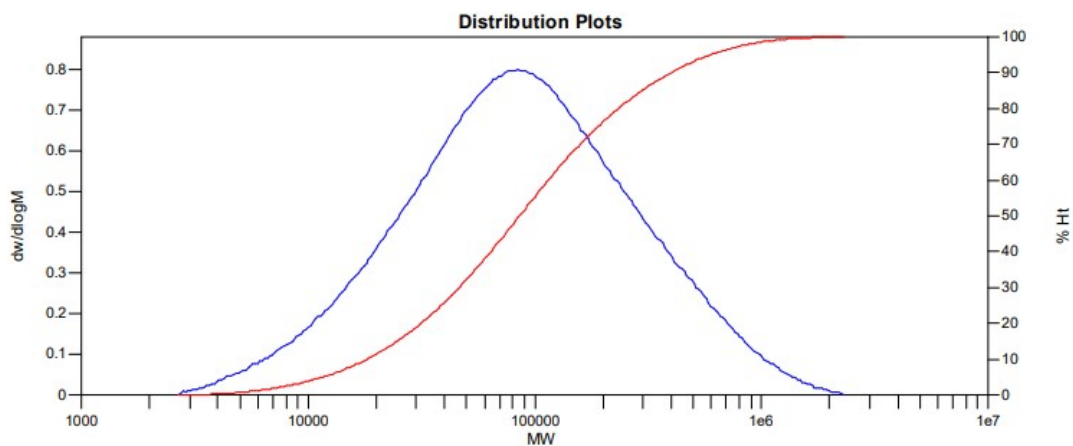

**MW Averages**

| Peak No | Mp    | Mn    | Mw     | Mz     | Mz+1   | Mv     | PD      |
|---------|-------|-------|--------|--------|--------|--------|---------|
| 1       | 84401 | 42629 | 161084 | 455022 | 829482 | 133072 | 3.77874 |

**Processed Peaks**

| Peak No | Name | Start RT (mins) | Max RT (mins) | End RT (mins) | Pk Height (mV) | % Height | Area (mV.secs) | % Area |
|---------|------|-----------------|---------------|---------------|----------------|----------|----------------|--------|
| 1       |      | 11.48           | 13.73         | 16.08         | -6.77933       | 0        | 797.235        | 100    |

Figure S90 GPC of the polymer from Table 1, Entry 9.

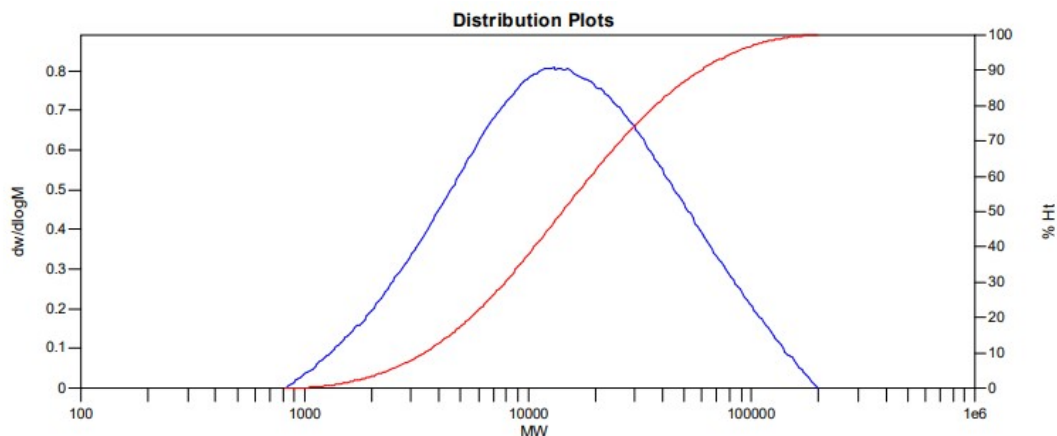

**MW Averages**

| Peak No | Mp    | Mn   | Mw    | Mz    | Mz+1  | Mv    | PD      |
|---------|-------|------|-------|-------|-------|-------|---------|
| 1       | 13017 | 8115 | 24013 | 54656 | 85883 | 20662 | 2.95909 |

**Processed Peaks**

| Peak No | Name | Start RT (mins) | Max RT (mins) | End RT (mins) | Pk Height (mV) | % Height | Area (mV.secs) | % Area |
|---------|------|-----------------|---------------|---------------|----------------|----------|----------------|--------|
| 1       |      | 12.75           | 14.62         | 16.52         | -8.0319        | 100      | 939.764        | 100    |

Figure S91 GPC of the polymer from Table 1, Entry 10.



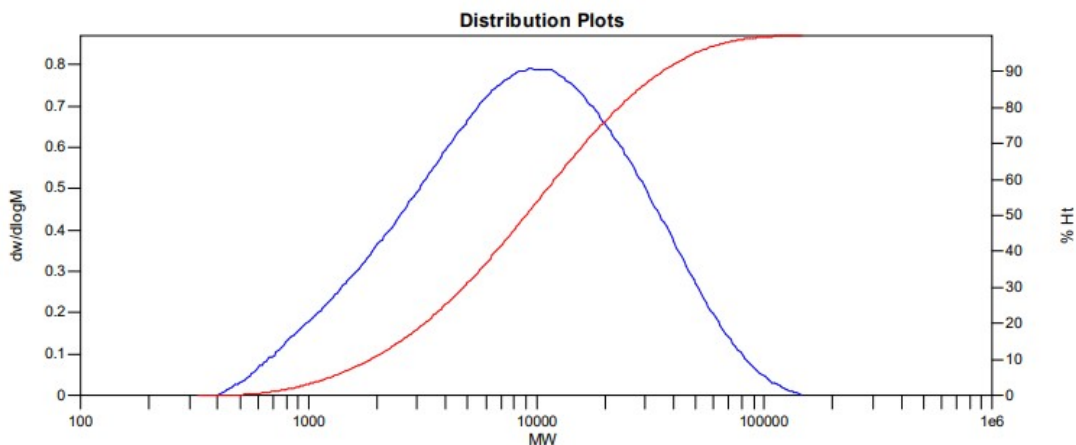

**MW Averages**

| Peak No | Mp   | Mn   | Mw    | Mz    | Mz+1  | Mv    | PD      |
|---------|------|------|-------|-------|-------|-------|---------|
| 1       | 9315 | 4580 | 14675 | 33273 | 53362 | 12553 | 3.20415 |

**Processed Peaks**

| Peak No | Name | Start RT (mins) | Max RT (mins) | End RT (mins) | Pk Height (mV) | % Height | Area (mV.secs) | % Area |
|---------|------|-----------------|---------------|---------------|----------------|----------|----------------|--------|
| 1       |      | 13.05           | 14.90         | 17.15         | -8.77272       | 0        | 1029.38        | 100    |

Figure S92 GPC of the polymer from Table 1, Entry 11.

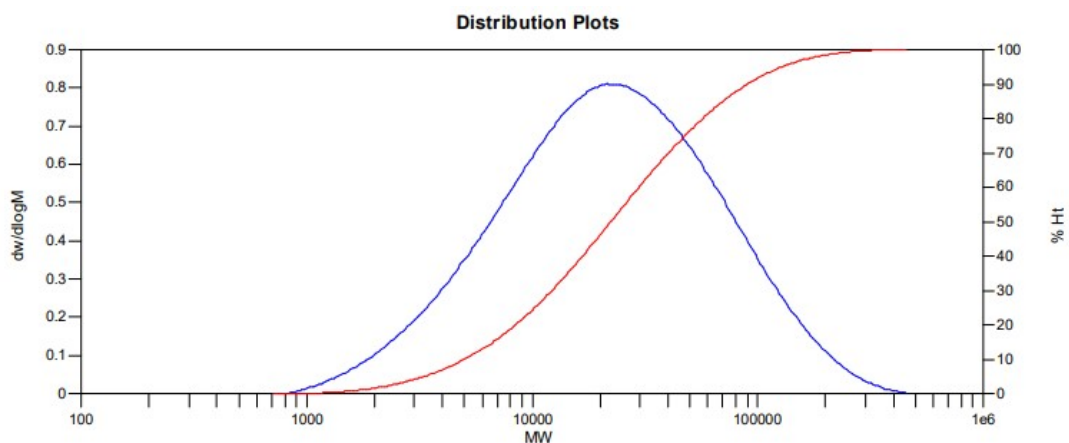

**MW Averages**

| Peak No | Mp    | Mn    | Mw    | Mz    | Mz+1   | Mv    | PD      |
|---------|-------|-------|-------|-------|--------|-------|---------|
| 1       | 21421 | 11789 | 37592 | 90643 | 155250 | 31972 | 3.18874 |

**Processed Peaks**

| Peak No | Name | Start RT (mins) | Max RT (mins) | End RT (mins) | Pk Height (mV) | % Height | Area (mV.secs) | % Area |
|---------|------|-----------------|---------------|---------------|----------------|----------|----------------|--------|
| 1       |      | 12.58           | 14.67         | 16.98         | -17.7935       | 100      | 2065.54        | 100    |

Figure S93 GPC of the polymer from Table 1, Entry 12.

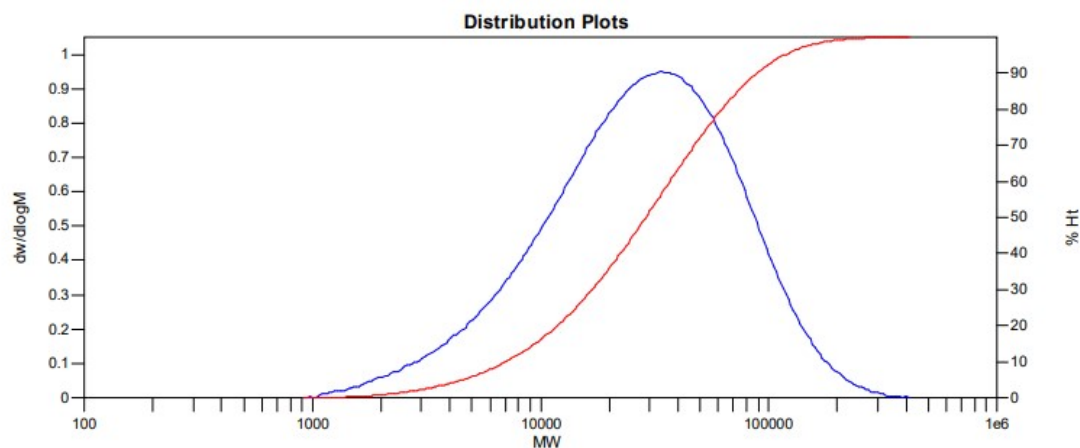

**MW Averages**

| Peak No | Mp    | Mn    | Mw    | Mz    | Mz+1   | Mv    | PD      |
|---------|-------|-------|-------|-------|--------|-------|---------|
| 1       | 33286 | 15568 | 40171 | 77018 | 120938 | 35675 | 2.58036 |

**Processed Peaks**

| Peak No | Name | Start RT (mins) | Max RT (mins) | End RT (mins) | Pk Height (mV) | % Height | Area (mV.secs) | % Area |
|---------|------|-----------------|---------------|---------------|----------------|----------|----------------|--------|
| 1       |      | 12.65           | 14.37         | 16.82         | -9.23924       | 0        | 914.999        | 100    |

**Figure S94** GPC of the polymer from Table 2, Entry 2.

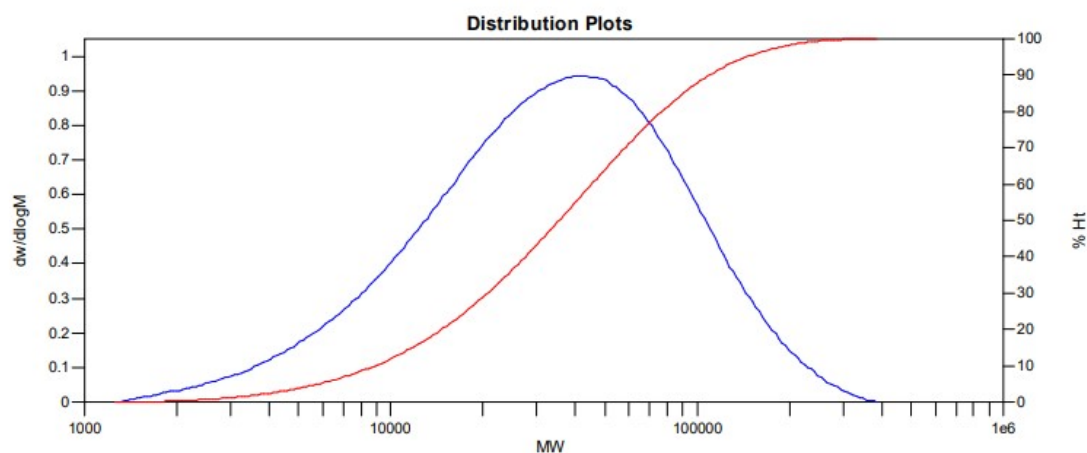

**MW Averages**

| Peak No | Mp    | Mn    | Mw    | Mz    | Mz+1   | Mv    | PD      |
|---------|-------|-------|-------|-------|--------|-------|---------|
| 1       | 42520 | 19556 | 49312 | 92706 | 139299 | 43874 | 2.52158 |

**Processed Peaks**

| Peak No | Name | Start RT (mins) | Max RT (mins) | End RT (mins) | Pk Height (mV) | % Height | Area (mV.secs) | % Area |
|---------|------|-----------------|---------------|---------------|----------------|----------|----------------|--------|
| 1       |      | 12.70           | 14.20         | 16.60         | -11.9419       | 0        | 1189.69        | 100    |

**Figure S95** GPC of the polymer from Table 2, Entry 3.



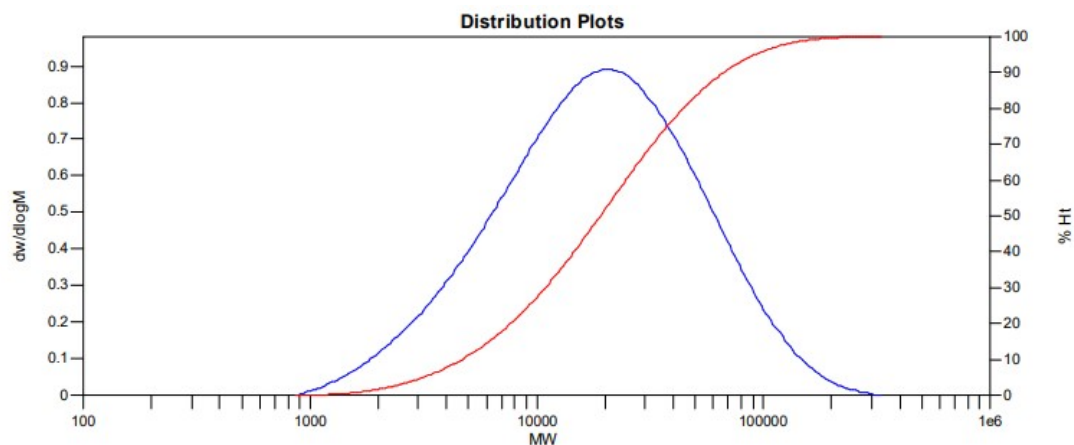

**MW Averages**

| Peak No | Mp    | Mn    | Mw    | Mz    | Mz+1   | Mv    | PD      |
|---------|-------|-------|-------|-------|--------|-------|---------|
| 1       | 19904 | 10772 | 29033 | 62109 | 102630 | 25313 | 2.69523 |

**Processed Peaks**

| Peak No | Name | Start RT (mins) | Max RT (mins) | End RT (mins) | Pk Height (mV) | % Height | Area (mV.secs) | % Area |
|---------|------|-----------------|---------------|---------------|----------------|----------|----------------|--------|
| 1       |      | 12.80           | 14.72         | 16.85         | -15.3728       | 0        | 1622.11        | 100    |

**Figure S96** GPC of the polymer from Table 2, Entry 4.

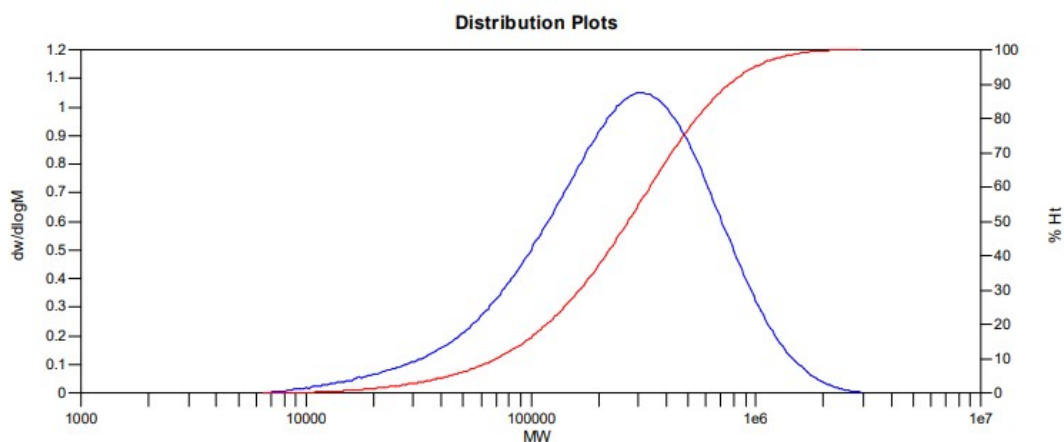

**MW Averages**

| Peak No | Mp     | Mn     | Mw     | Mz     | Mz+1   | Mv     | PD      |
|---------|--------|--------|--------|--------|--------|--------|---------|
| 1       | 308987 | 144788 | 356603 | 636793 | 955183 | 320819 | 2.46293 |

**Processed Peaks**

| Peak No | Name | Start RT (mins) | Max RT (mins) | End RT (mins) | Pk Height (mV) | % Height | Area (mV.secs) | % Area |
|---------|------|-----------------|---------------|---------------|----------------|----------|----------------|--------|
| 1       |      | 11.32           | 12.85         | 15.48         | -15.7281       | 0        | 1409.1         | 100    |

**Figure S97** GPC of the polymer from Table 2, Entry 6.

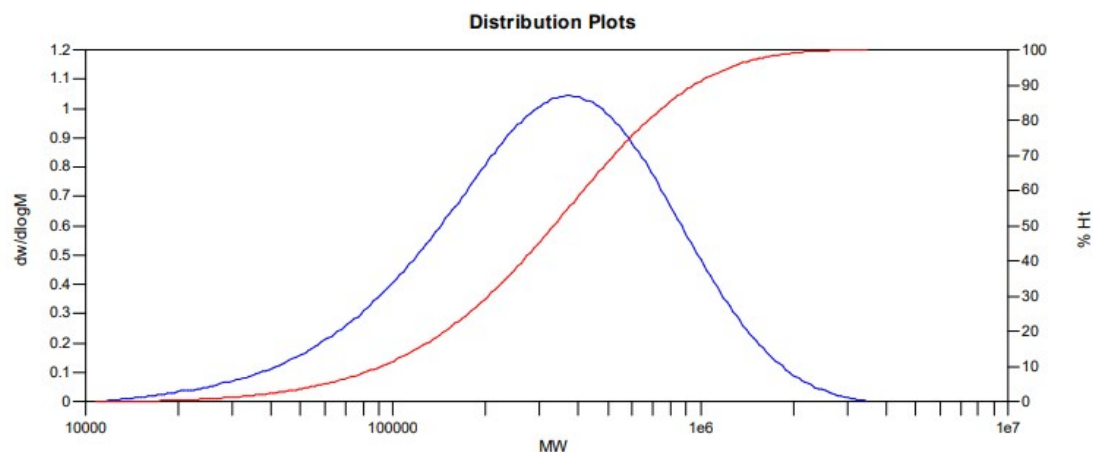

**MW Averages**

| Peak No | Mp     | Mn     | Mw     | Mz     | Mz+1    | Mv     | PD      |
|---------|--------|--------|--------|--------|---------|--------|---------|
| 1       | 375847 | 192731 | 443387 | 794337 | 1193853 | 399201 | 2.30055 |

**Processed Peaks**

| Peak No | Name | Start RT (mins) | Max RT (mins) | End RT (mins) | Pk Height (mV) | % Height | Area (mV.secs) | % Area |
|---------|------|-----------------|---------------|---------------|----------------|----------|----------------|--------|
| 1       |      | 11.20           | 12.72         | 15.13         | -12.1787       | 0        | 1096.9         | 100    |

**Figure S98** GPC of the polymer from Table 2, Entry 7.

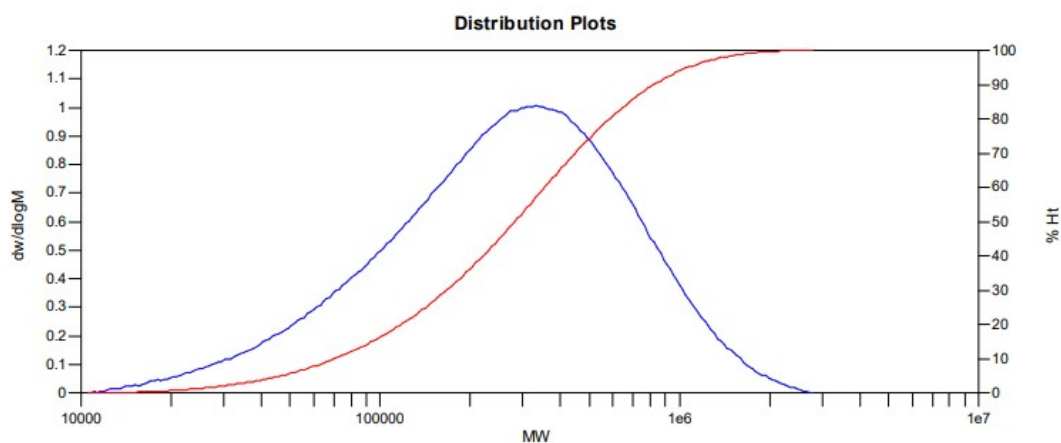

**MW Averages**

| Peak No | Mp     | Mn     | Mw     | Mz     | Mz+1    | Mv     | PD      |
|---------|--------|--------|--------|--------|---------|--------|---------|
| 1       | 332538 | 156499 | 376500 | 678613 | 1000584 | 337629 | 2.40577 |

**Processed Peaks**

| Peak No | Name | Start RT (mins) | Max RT (mins) | End RT (mins) | Pk Height (mV) | % Height | Area (mV.secs) | % Area |
|---------|------|-----------------|---------------|---------------|----------------|----------|----------------|--------|
| 1       |      | 11.35           | 12.80         | 15.15         | -8.26655       | 0        | 773.127        | 100    |

**Figure S99** GPC of the polymer from Table 2, Entry 8.

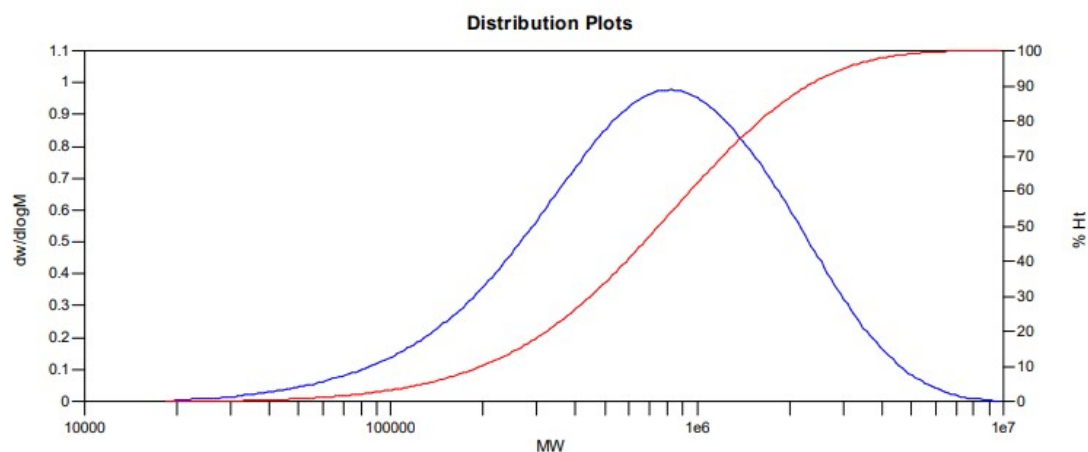

**MW Averages**

| Peak No | Mp     | Mn     | Mw      | Mz      | Mz+1    | Mv     | PD      |
|---------|--------|--------|---------|---------|---------|--------|---------|
| 1       | 822797 | 415864 | 1040081 | 1955677 | 3004301 | 927353 | 2.50101 |

**Processed Peaks**

| Peak No | Name | Start RT (mins) | Max RT (mins) | End RT (mins) | Pk Height (mV) | % Height | Area (mV.secs) | % Area |
|---------|------|-----------------|---------------|---------------|----------------|----------|----------------|--------|
| 1       |      | 10.50           | 12.18         | 14.77         | -17.7542       | 0        | 1708.23        | 100    |

**Figure S100** GPC of the polymer from Table 2, Entry 10.

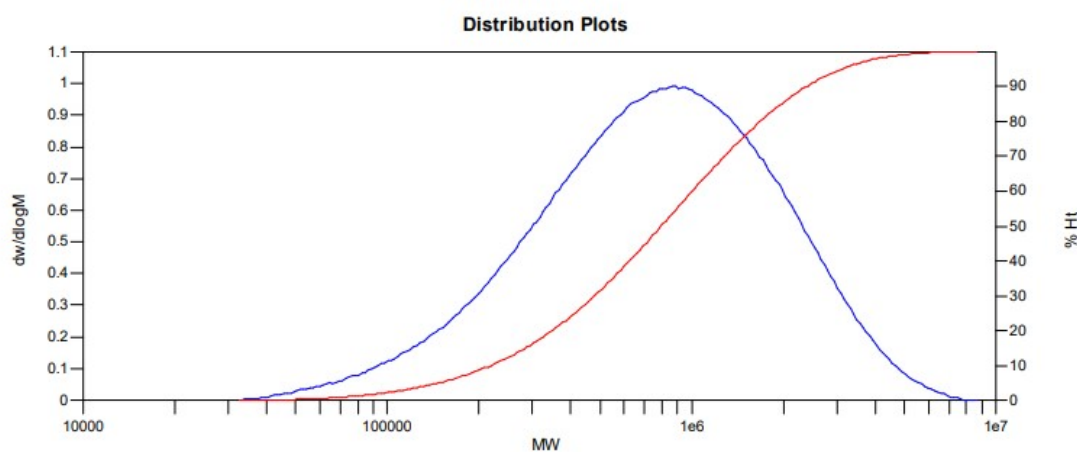

**MW Averages**

| Peak No | Mp     | Mn     | Mw      | Mz      | Mz+1    | Mv     | PD      |
|---------|--------|--------|---------|---------|---------|--------|---------|
| 1       | 864093 | 472071 | 1081851 | 1946250 | 2866644 | 971681 | 2.29171 |

**Processed Peaks**

| Peak No | Name | Start RT (mins) | Max RT (mins) | End RT (mins) | Pk Height (mV) | % Height | Area (mV.secs) | % Area |
|---------|------|-----------------|---------------|---------------|----------------|----------|----------------|--------|
| 1       |      | 10.58           | 12.15         | 14.38         | -8.22666       | 0        | 780.9          | 100    |

**Figure S101** GPC of the polymer from Table 2, Entry 11.

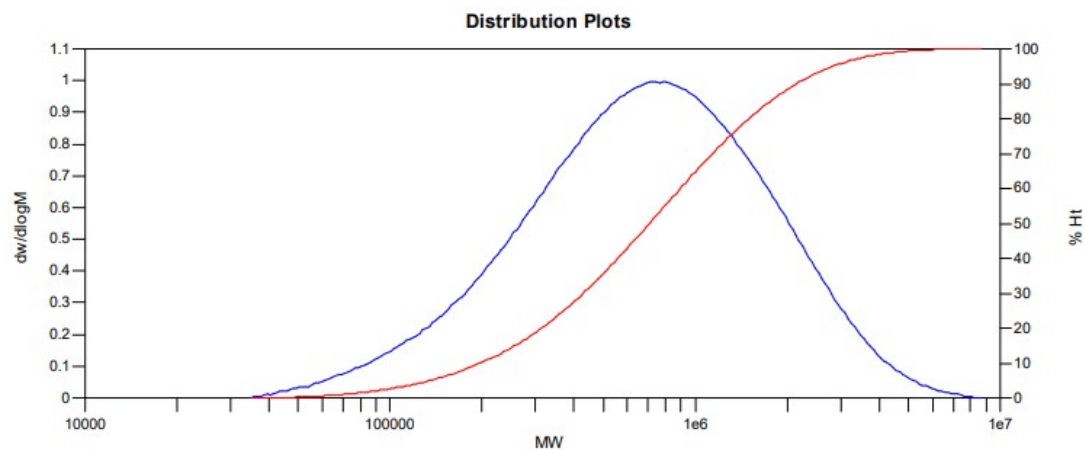

**MW Averages**

| Peak No | Mp     | Mn     | Mw     | Mz      | Mz+1    | Mv     | PD      |
|---------|--------|--------|--------|---------|---------|--------|---------|
| 1       | 727987 | 429798 | 979016 | 1813822 | 2775201 | 876699 | 2.27785 |

**Processed Peaks**

| Peak No | Name | Start RT (mins) | Max RT (mins) | End RT (mins) | Pk Height (mV) | % Height | Area (mV.secs) | % Area |
|---------|------|-----------------|---------------|---------------|----------------|----------|----------------|--------|
| 1       |      | 10.58           | 12.27         | 14.33         | -11.8658       | 0        | 1118.18        | 100    |

**Figure S102** GPC of the polymer from Table 2, Entry 12.

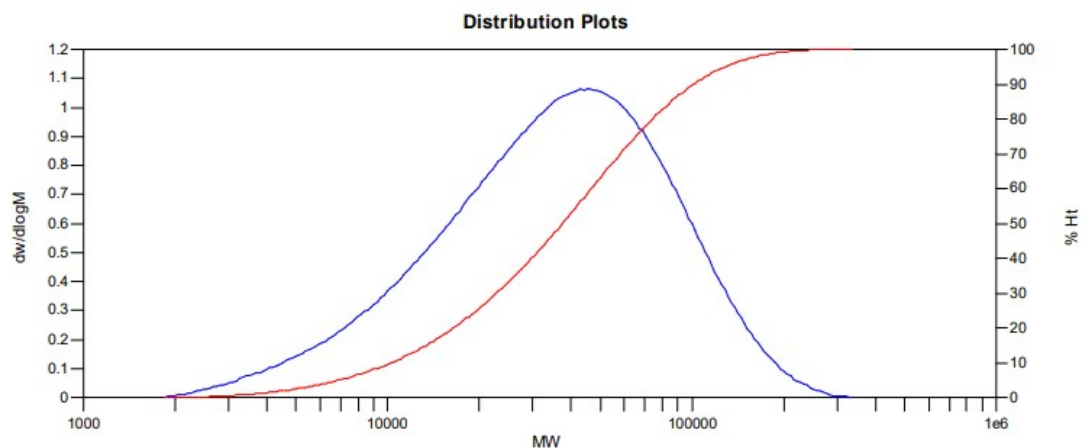

**MW Averages**

| Peak No | Mp    | Mn    | Mw    | Mz    | Mz+1   | Mv    | PD      |
|---------|-------|-------|-------|-------|--------|-------|---------|
| 1       | 45242 | 22290 | 47873 | 80407 | 113843 | 43506 | 2.14773 |

**Processed Peaks**

| Peak No | Name | Start RT (mins) | Max RT (mins) | End RT (mins) | Pk Height (mV) | % Height | Area (mV.secs) | % Area |
|---------|------|-----------------|---------------|---------------|----------------|----------|----------------|--------|
| 1       |      | 12.58           | 13.97         | 16.08         | -14.3308       | 0        | 1253.4         | 100    |

**Figure S103** GPC of the polymer from Table 3, Entry 1.

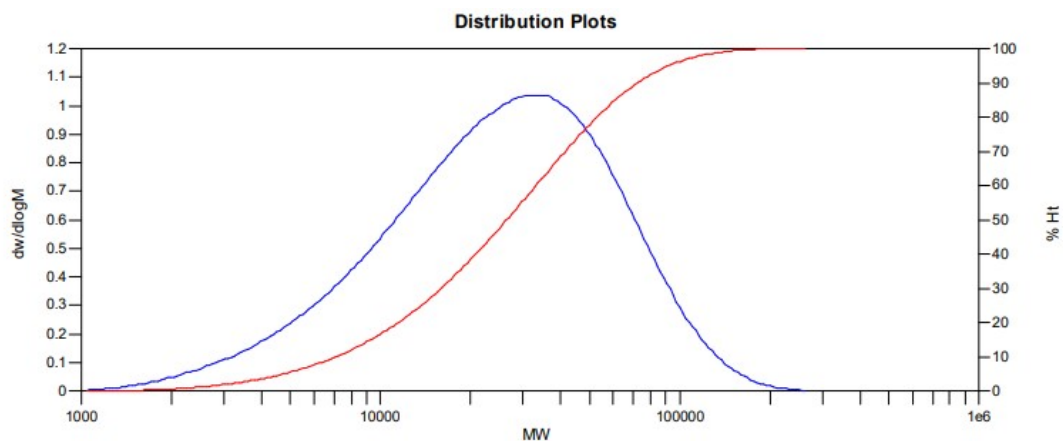

**MW Averages**

| Peak No | Mp    | Mn    | Mw    | Mz    | Mz+1  | Mv    | PD      |
|---------|-------|-------|-------|-------|-------|-------|---------|
| 1       | 31971 | 15382 | 34079 | 58155 | 83567 | 30881 | 2.21551 |

**Processed Peaks**

| Peak No | Name | Start RT (mins) | Max RT (mins) | End RT (mins) | Pk Height (mV) | % Height | Area (mV.secs) | % Area |
|---------|------|-----------------|---------------|---------------|----------------|----------|----------------|--------|
| 1       |      | 12.75           | 14.17         | 16.47         | -12.518        | 0        | 1121.34        | 100    |

Figure S104 GPC of the polymer from Table 3, Entry 2.

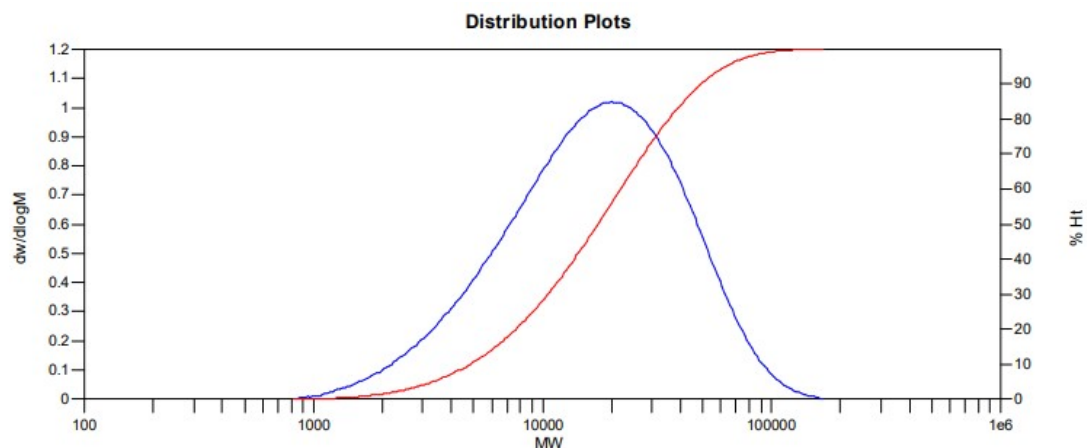

**MW Averages**

| Peak No | Mp    | Mn    | Mw    | Mz    | Mz+1  | Mv    | PD      |
|---------|-------|-------|-------|-------|-------|-------|---------|
| 1       | 19958 | 10582 | 22900 | 39539 | 57173 | 20724 | 2.16405 |

**Processed Peaks**

| Peak No | Name | Start RT (mins) | Max RT (mins) | End RT (mins) | Pk Height (mV) | % Height | Area (mV.secs) | % Area |
|---------|------|-----------------|---------------|---------------|----------------|----------|----------------|--------|
| 1       |      | 13.05           | 14.48         | 16.63         | -14.4653       | 0        | 1318.02        | 100    |

Figure S105 GPC of the polymer from Table 3, Entry 3.



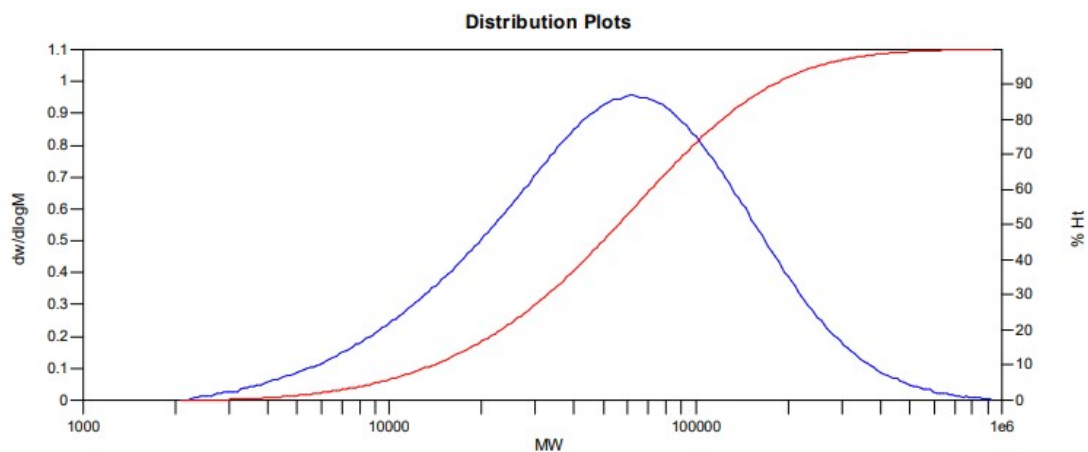

**MW Averages**

| Peak No | Mp    | Mn    | Mw    | Mz     | Mz+1   | Mv    | PD      |
|---------|-------|-------|-------|--------|--------|-------|---------|
| 1       | 62453 | 30849 | 80929 | 169083 | 289518 | 71125 | 2.62339 |

**Processed Peaks**

| Peak No | Name | Start RT (mins) | Max RT (mins) | End RT (mins) | Pk Height (mV) | % Height | Area (mV.secs) | % Area |
|---------|------|-----------------|---------------|---------------|----------------|----------|----------------|--------|
| 1       |      | 11.90           | 13.72         | 16.00         | -12.6424       | 0        | 1227.18        | 100    |

**Figure S106** GPC of the polymer from Table 3, Entry 4.

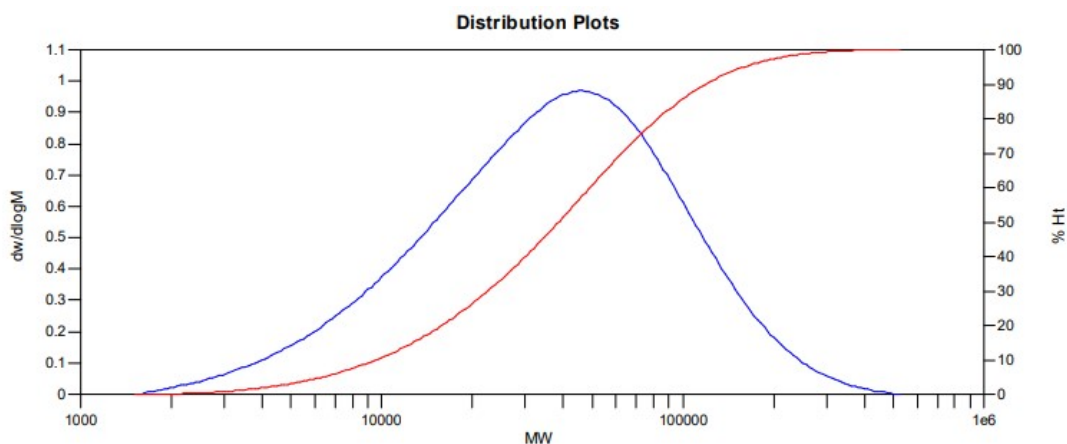

**MW Averages**

| Peak No | Mp    | Mn    | Mw    | Mz     | Mz+1   | Mv    | PD      |
|---------|-------|-------|-------|--------|--------|-------|---------|
| 1       | 45242 | 21448 | 54081 | 105500 | 167855 | 47949 | 2.52149 |

**Processed Peaks**

| Peak No | Name | Start RT (mins) | Max RT (mins) | End RT (mins) | Pk Height (mV) | % Height | Area (mV.secs) | % Area |
|---------|------|-----------------|---------------|---------------|----------------|----------|----------------|--------|
| 1       |      | 12.28           | 13.93         | 16.22         | -15.4098       | 100      | 1475.37        | 100    |

**Figure S107** GPC of the polymer from Table 3, Entry 5.

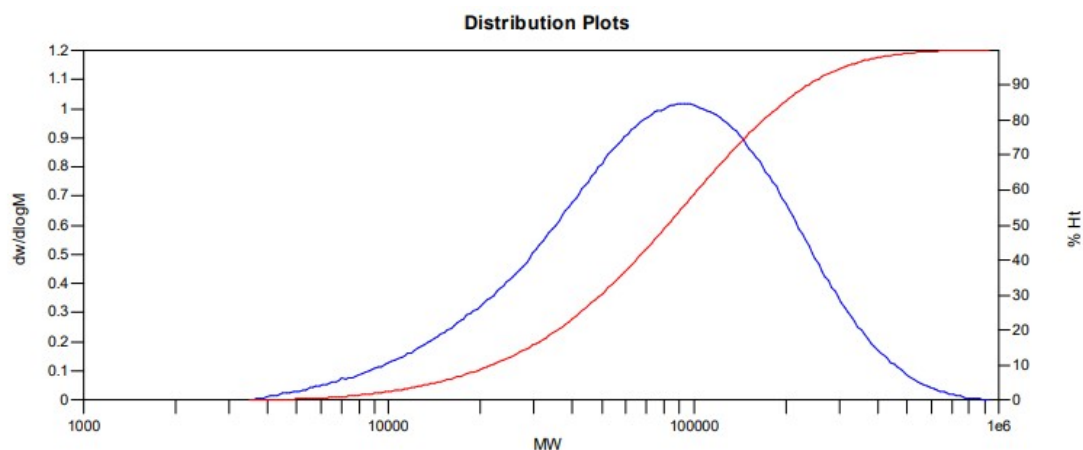

**MW Averages**

| Peak No | Mp    | Mn    | Mw     | Mz     | Mz+1   | Mv    | PD     |
|---------|-------|-------|--------|--------|--------|-------|--------|
| 1       | 90596 | 47570 | 109435 | 196028 | 292770 | 98442 | 2.3005 |

**Processed Peaks**

| Peak No | Name | Start RT (mins) | Max RT (mins) | End RT (mins) | Pk Height (mV) | % Height | Area (mV.secs) | % Area |
|---------|------|-----------------|---------------|---------------|----------------|----------|----------------|--------|
| 1       |      | 11.90           | 13.47         | 15.65         | -10.0106       | 0        | 912.513        | 100    |

**Figure S108** GPC of the polymer from Table 3, Entry 6.

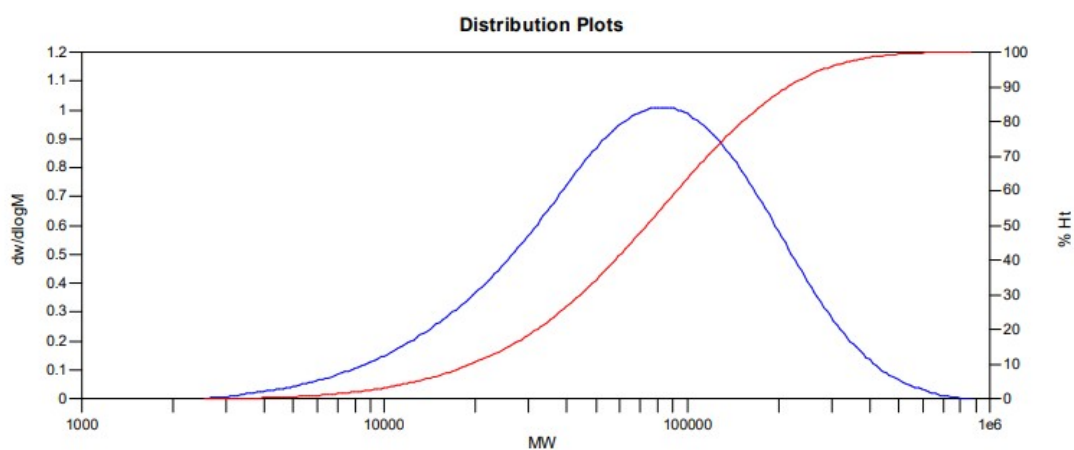

**MW Averages**

| Peak No | Mp    | Mn    | Mw    | Mz     | Mz+1   | Mv    | PD      |
|---------|-------|-------|-------|--------|--------|-------|---------|
| 1       | 80031 | 41961 | 99203 | 180836 | 273702 | 88979 | 2.36417 |

**Processed Peaks**

| Peak No | Name | Start RT (mins) | Max RT (mins) | End RT (mins) | Pk Height (mV) | % Height | Area (mV.secs) | % Area |
|---------|------|-----------------|---------------|---------------|----------------|----------|----------------|--------|
| 1       |      | 11.95           | 13.55         | 15.87         | -16.5856       | 0        | 1526.4         | 100    |

**Figure S109** GPC of the polymer from Table 3, Entry 7.

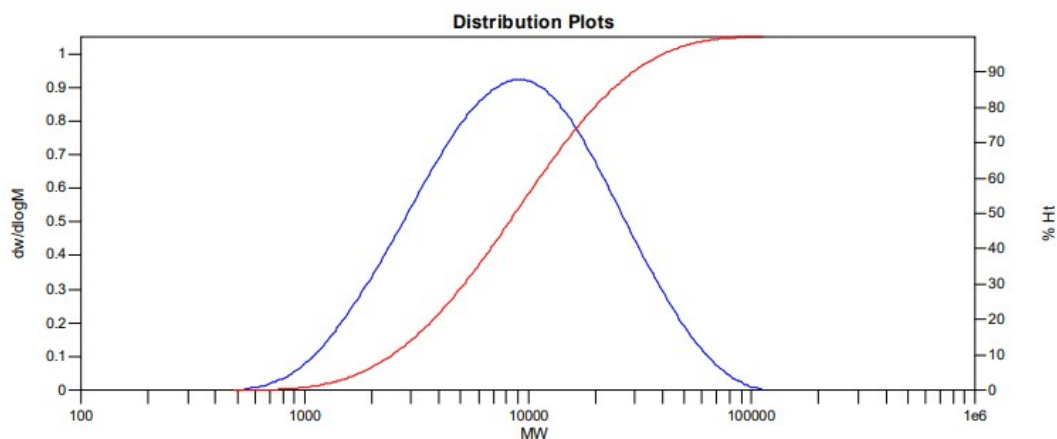

**MW Averages**

| Peak No | Mp   | Mn   | Mw    | Mz    | Mz+1  | Mv    | PD      |
|---------|------|------|-------|-------|-------|-------|---------|
| 1       | 8804 | 5534 | 12925 | 25697 | 40200 | 11429 | 2.33556 |

**Processed Peaks**

| Peak No | Name | Start RT (mins) | Max RT (mins) | End RT (mins) | Pk Height (mV) | % Height | Area (mV.secs) | % Area |
|---------|------|-----------------|---------------|---------------|----------------|----------|----------------|--------|
| 1       |      | 13.32           | 15.03         | 16.98         | -18.5911       | 100      | 1869.49        | 100    |

Figure S110 GPC of the polymer from Table 3, Entry 8.

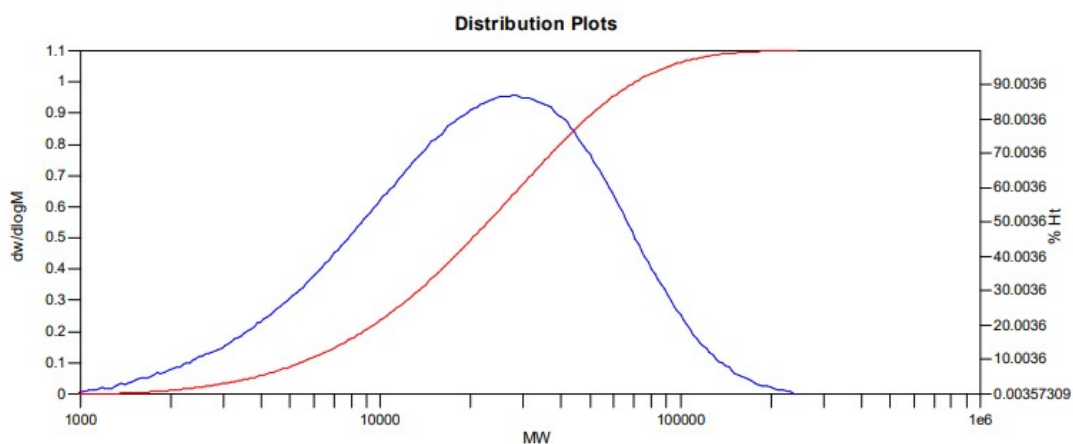

**MW Averages**

| Peak No | Mp    | Mn    | Mw    | Mz    | Mz+1  | Mv    | PD      |
|---------|-------|-------|-------|-------|-------|-------|---------|
| 1       | 27551 | 12806 | 30968 | 56736 | 84705 | 27691 | 2.41824 |

**Processed Peaks**

| Peak No | Name | Start RT (mins) | Max RT (mins) | End RT (mins) | Pk Height (mV) | % Height | Area (mV.secs) | % Area |
|---------|------|-----------------|---------------|---------------|----------------|----------|----------------|--------|
| 1       |      | 12.80           | 14.27         | 16.52         | -7.70159       | 0        | 747.811        | 100    |

Figure S111 GPC of the polymer from Table 3, Entry 9.



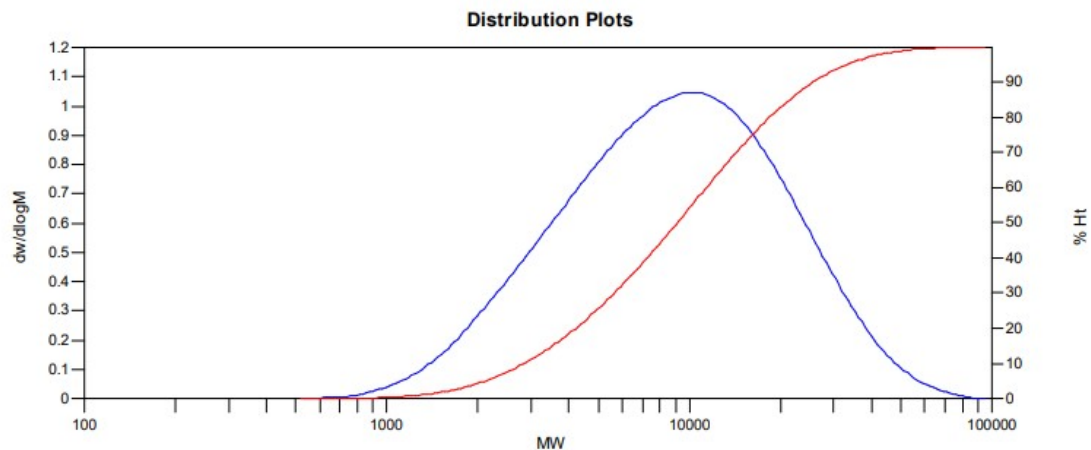

**MW Averages**

| Peak No | Mp    | Mn   | Mw    | Mz    | Mz+1  | Mv    | PD      |
|---------|-------|------|-------|-------|-------|-------|---------|
| 1       | 10473 | 6103 | 12014 | 20620 | 30173 | 10921 | 1.96854 |

**Processed Peaks**

| Peak No | Name | Start RT (mins) | Max RT (mins) | End RT (mins) | Pk Height (mV) | % Height | Area (mV.secs) | % Area |
|---------|------|-----------------|---------------|---------------|----------------|----------|----------------|--------|
| 1       |      | 13.43           | 14.92         | 16.93         | -15.7381       | 0        | 1396.6         | 100    |

**Figure S112** GPC of the polymer from Table 3, Entry 10.

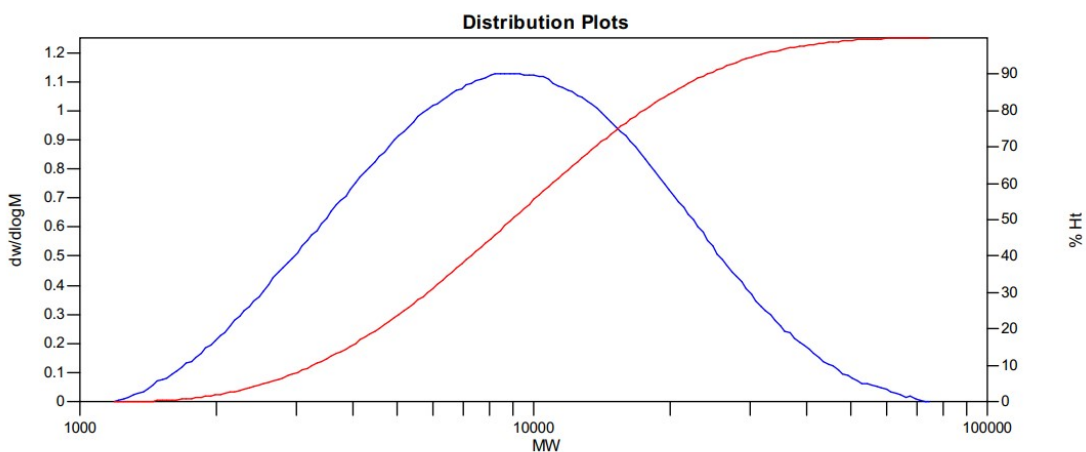

**MW Averages**

| Peak No | Mp   | Mn   | Mw    | Mz    | Mz+1  | Mv    | PD      |
|---------|------|------|-------|-------|-------|-------|---------|
| 1       | 8243 | 6698 | 11653 | 19104 | 27570 | 10714 | 1.73977 |

**Processed Peaks**

| Peak No | Name | Start RT (mins) | Max RT (mins) | End RT (mins) | Pk Height (mV) | % Height | Area (mV.secs) | % Area |
|---------|------|-----------------|---------------|---------------|----------------|----------|----------------|--------|
| 1       |      | 13.82           | 15.32         | 16.63         | -6.53222       | 0        | 545.336        | 100    |

**Figure S113** GPC of the polymer from Table 3, Entry 11.

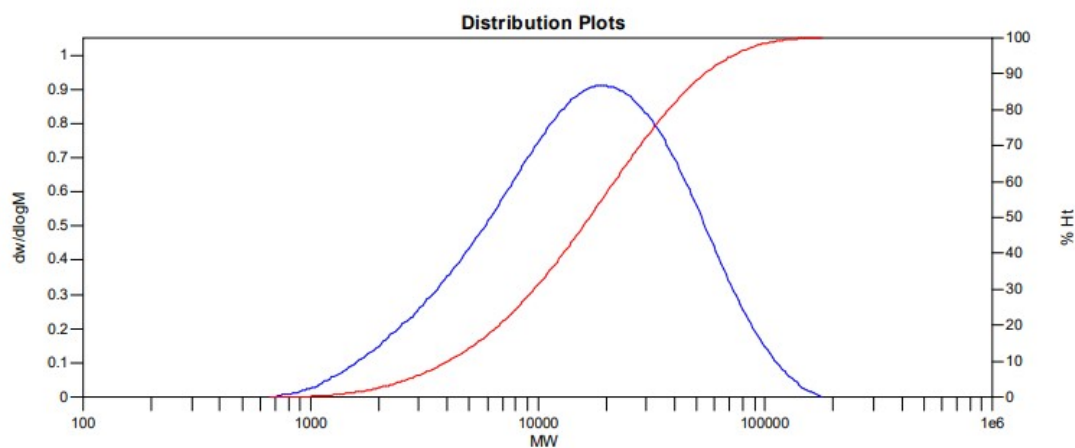

**MW Averages**

| Peak No | Mp    | Mn   | Mw    | Mz    | Mz+1  | Mv    | PD      |
|---------|-------|------|-------|-------|-------|-------|---------|
| 1       | 19469 | 9318 | 23885 | 45429 | 67554 | 21167 | 2.56332 |

**Processed Peaks**

| Peak No | Name | Start RT (mins) | Max RT (mins) | End RT (mins) | Pk Height (mV) | % Height | Area (mV.secs) | % Area |
|---------|------|-----------------|---------------|---------------|----------------|----------|----------------|--------|
| 1       |      | 13.02           | 14.45         | 16.77         | -12.4454       | 0        | 1273.76        | 100    |

Figure S114 GPC of the polymer from Table 3, Entry 12.

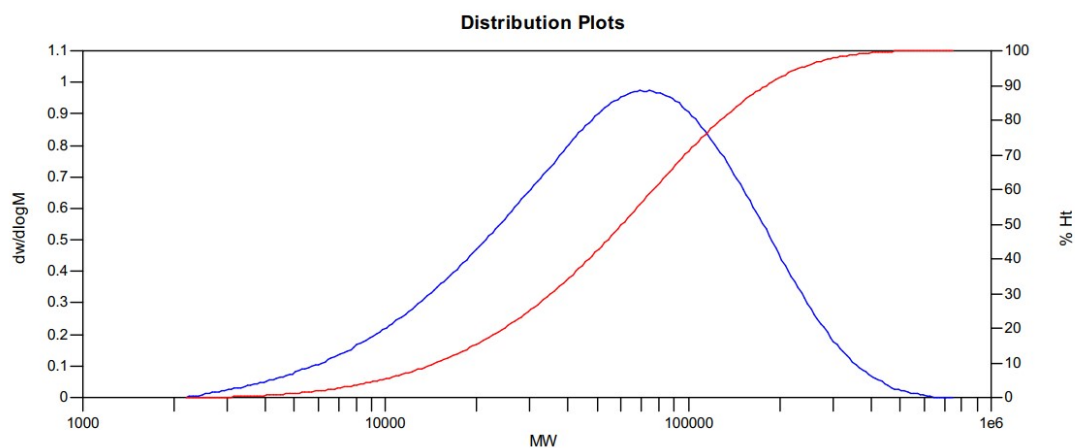

**MW Averages**

| Peak No | Mp    | Mn    | Mw    | Mz     | Mz+1   | Mv    | PD      |
|---------|-------|-------|-------|--------|--------|-------|---------|
| 1       | 74675 | 32751 | 81829 | 149985 | 223305 | 73100 | 2.49852 |

**Processed Peaks**

| Peak No | Name | Start RT (mins) | Max RT (mins) | End RT (mins) | Pk Height (mV) | % Height | Area (mV.secs) | % Area |
|---------|------|-----------------|---------------|---------------|----------------|----------|----------------|--------|
| 1       |      | 12.25           | 13.82         | 16.22         | -12.0205       | 0        | 1161.29        | 100    |

Figure S115 GPC of the polymer from Table 3, Entry 13.

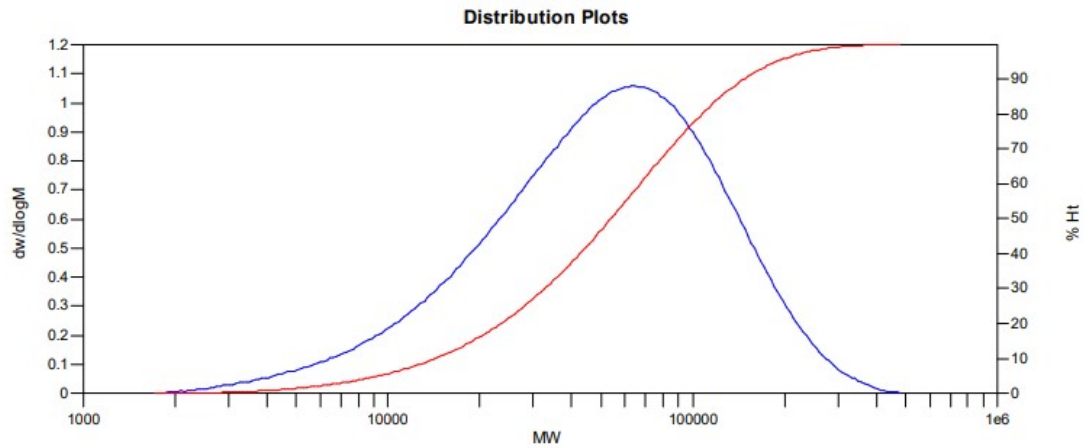

**MW Averages**

| Peak No | Mp    | Mn    | Mw    | Mz     | Mz+1   | Mv    | PD      |
|---------|-------|-------|-------|--------|--------|-------|---------|
| 1       | 62913 | 30558 | 69099 | 117441 | 167348 | 62631 | 2.26124 |

**Processed Peaks**

| Peak No | Name | Start RT (mins) | Max RT (mins) | End RT (mins) | Pk Height (mV) | % Height | Area (mV.secs) | % Area |
|---------|------|-----------------|---------------|---------------|----------------|----------|----------------|--------|
| 1       |      | 12.55           | 13.93         | 16.38         | -13.6434       | 0        | 1212.57        | 100    |

Figure S116 GPC of the polymer from Table 3, Entry 14.

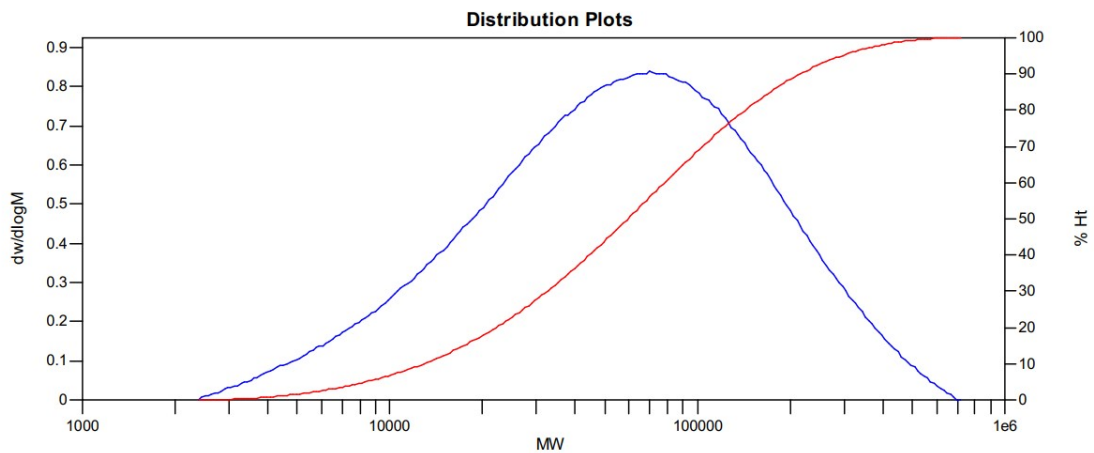

**MW Averages**

| Peak No | Mp    | Mn    | Mw    | Mz     | Mz+1   | Mv    | PD      |
|---------|-------|-------|-------|--------|--------|-------|---------|
| 1       | 69932 | 30352 | 90865 | 189940 | 290248 | 78905 | 2.99371 |

**Processed Peaks**

| Peak No | Name | Start RT (mins) | Max RT (mins) | End RT (mins) | Pk Height (mV) | % Height | Area (mV.secs) | % Area |
|---------|------|-----------------|---------------|---------------|----------------|----------|----------------|--------|
| 1       |      | 12.50           | 14.08         | 16.38         | -7.29707       | 0        | 818.363        | 100    |

Figure S117 GPC of the polymer from Table 3, Entry 15.

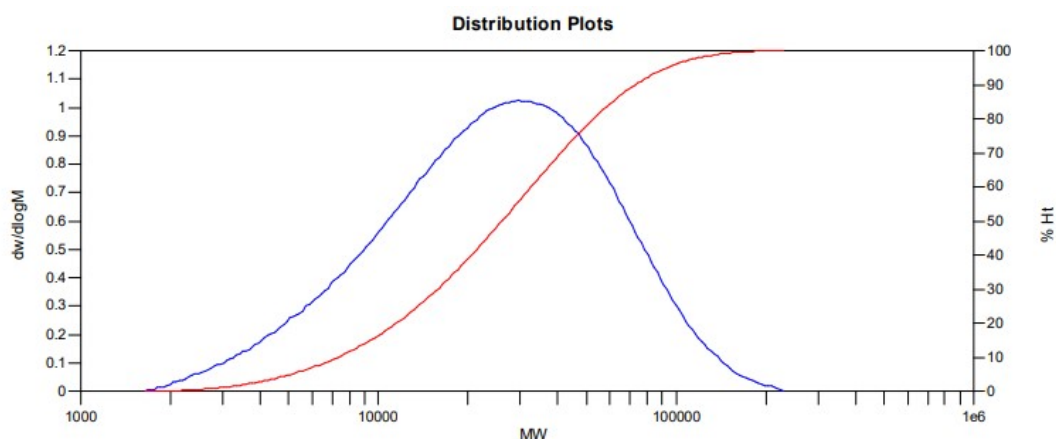

**MW Averages**

| Peak No | Mp    | Mn    | Mw    | Mz    | Mz+1  | Mv    | PD      |
|---------|-------|-------|-------|-------|-------|-------|---------|
| 1       | 29450 | 16103 | 34091 | 58669 | 84567 | 30882 | 2.11706 |

**Processed Peaks**

| Peak No | Name | Start RT (mins) | Max RT (mins) | End RT (mins) | Pk Height (mV) | % Height | Area (mV.secs) | % Area |
|---------|------|-----------------|---------------|---------------|----------------|----------|----------------|--------|
| 1       |      | 13.05           | 14.45         | 16.42         | -8.24736       | 0        | 757.584        | 100    |

**Figure S118** GPC of the polymer from Table 3, Entry 16.

## 7. X-ray Crystallography

|                                   |                                                     |
|-----------------------------------|-----------------------------------------------------|
| Entry                             | Ni1                                                 |
| Empirical formula                 | C <sub>30</sub> H <sub>35</sub> N <sub>2</sub> NiOP |
| Formula weight                    | 529.28                                              |
| Temperature/K                     | 100                                                 |
| Crystal system                    | orthorhombic                                        |
| Space group                       | P2 <sub>1</sub> 2 <sub>1</sub> 2 <sub>1</sub>       |
| a/Å                               | 8.6966(6)                                           |
| b/Å                               | 15.9160(12)                                         |
| c/Å                               | 19.1276(19)                                         |
| α/°                               | 90                                                  |
| β/°                               | 90                                                  |
| γ/°                               | 90                                                  |
| Volume/Å <sup>3</sup>             | 2647.5(4)                                           |
| Z                                 | 4                                                   |
| ρcalcg/cm <sup>3</sup>            | 1.328                                               |
| μ/mm <sup>-1</sup>                | 0.819                                               |
| F(000)                            | 1120.0                                              |
| Crystal size/mm <sup>3</sup>      | 0.19 × 0.08 × 0.05                                  |
| Radiation                         | MoKα (λ = 0.71073)                                  |
| 2θ range for data collection/°    | 4.97 to 52.76                                       |
| Index ranges                      | -10 ≤ h ≤ 10, -19 ≤ k ≤ 18, -23 ≤ l ≤ 16            |
| Reflections collected             | 11685                                               |
| Independent reflections           | 5167 [Rint = 0.0826, Rsigma = 0.1291]               |
| Data/restraints/parameters        | 5167/0/322                                          |
| Goodness-of-fit on F <sup>2</sup> | 1.043                                               |

|                                                |                                  |
|------------------------------------------------|----------------------------------|
| Final R indexes [ $I \geq 2\sigma(I)$ ]        | $R_1 = 0.0572$ , $wR_2 = 0.0925$ |
| Final R indexes [all data]                     | $R_1 = 0.0973$ , $wR_2 = 0.1121$ |
| Largest diff. peak/hole / $e \text{ \AA}^{-3}$ | 0.43/-0.44                       |

Summary of Data – CCDC. 2257728

| Entry                                          | Ni2                                                                |
|------------------------------------------------|--------------------------------------------------------------------|
| Empirical formula                              | $C_{32}H_{37}N_2NiO_2P$                                            |
| Formula weight                                 | 571.31                                                             |
| Temperature/K                                  | 100                                                                |
| Crystal system                                 | triclinic                                                          |
| Space group                                    | P-1                                                                |
| $a/\text{\AA}$                                 | 9.1318(5)                                                          |
| $b/\text{\AA}$                                 | 9.5917(4)                                                          |
| $c/\text{\AA}$                                 | 16.6693(9)                                                         |
| $\alpha/^\circ$                                | 96.988(2)                                                          |
| $\beta/^\circ$                                 | 92.616(2)                                                          |
| $\gamma/^\circ$                                | 104.598(2)                                                         |
| Volume/ $\text{\AA}^3$                         | 1397.99(12)                                                        |
| Z                                              | 2                                                                  |
| $\rho_{\text{calc}}/\text{cm}^3$               | 1.357                                                              |
| $\mu/\text{mm}^{-1}$                           | 0.783                                                              |
| F(000)                                         | 604.0                                                              |
| Crystal size/ $\text{mm}^3$                    | $0.15 \times 0.08 \times 0.05$                                     |
| Radiation                                      | MoK $\alpha$ ( $\lambda = 0.71073$ )                               |
| $2\Theta$ range for data collection/ $^\circ$  | 4.43 to 52.864                                                     |
| Index ranges                                   | $-11 \leq h \leq 11$ , $-11 \leq k \leq 12$ , $-20 \leq l \leq 20$ |
| Reflections collected                          | 16326                                                              |
| Independent reflections                        | 5710 [ $R_{\text{int}} = 0.0533$ , $R_{\text{sigma}} = 0.0636$ ]   |
| Data/restraints/parameters                     | 5710/0/347                                                         |
| Goodness-of-fit on $F^2$                       | 1.045                                                              |
| Final R indexes [ $I \geq 2\sigma(I)$ ]        | $R_1 = 0.0428$ , $wR_2 = 0.0823$                                   |
| Final R indexes [all data]                     | $R_1 = 0.0657$ , $wR_2 = 0.0939$                                   |
| Largest diff. peak/hole / $e \text{ \AA}^{-3}$ | 0.35/-0.40                                                         |

Summary of Data – CCDC. 2257729

| Entry                            | Ni3                   |
|----------------------------------|-----------------------|
| Empirical formula                | $C_{40}H_{37}N_2NiOP$ |
| Formula weight                   | 651.39                |
| Temperature/K                    | 170.0                 |
| Crystal system                   | triclinic             |
| Space group                      | P-1                   |
| $a/\text{\AA}$                   | 10.4219(8)            |
| $b/\text{\AA}$                   | 12.3823(10)           |
| $c/\text{\AA}$                   | 12.6499(9)            |
| $\alpha/^\circ$                  | 88.716(2)             |
| $\beta/^\circ$                   | 83.981(2)             |
| $\gamma/^\circ$                  | 85.981(3)             |
| Volume/ $\text{\AA}^3$           | 1619.3(2)             |
| Z                                | 2                     |
| $\rho_{\text{calc}}/\text{cm}^3$ | 1.336                 |

---

|                                                |                                                              |
|------------------------------------------------|--------------------------------------------------------------|
| $\mu/\text{mm}^{-1}$                           | 0.684                                                        |
| F(000)                                         | 684.0                                                        |
| Crystal size/ $\text{mm}^3$                    | $0.12 \times 0.07 \times 0.05$                               |
| Radiation                                      | MoK $\alpha$ ( $\lambda = 0.71073$ )                         |
| $2\Theta$ range for data collection/ $^\circ$  | 4.962 to 52.826                                              |
| Index ranges                                   | $-13 \leq h \leq 13, -15 \leq k \leq 15, -14 \leq l \leq 15$ |
| Reflections collected                          | 18704                                                        |
| Independent reflections                        | 6567 [Rint = 0.0351, Rsigma = 0.0416]                        |
| Data/restraints/parameters                     | 6567/0/410                                                   |
| Goodness-of-fit on $F^2$                       | 0.990                                                        |
| Final R indexes [ $I \geq 2\sigma(I)$ ]        | $R_1 = 0.0353, wR_2 = 0.0756$                                |
| Final R indexes [all data]                     | $R_1 = 0.0448, wR_2 = 0.0818$                                |
| Largest diff. peak/hole / $e \text{ \AA}^{-3}$ | 0.50/-0.33                                                   |

---

Summary of Data – CCDC. **2257730**
